# Supplementary material for: Gold(iii) chloride catalysed synthesis of 5-alkylidene-dihydrothiazoles
Source: Royal Society of Chemistry journal article supplement (doi:10.1039/c1ob05509g), 2011-01-01

# Gold(III)Chloride Catalysed Synthesis of 5-Alkylidene-dihydrothiazoles

Thomas S.A. Heugebaert, Leander P.D. Vervaecke and Christian V. Stevens\*

Research Group SynBioC, Department of Sustainable Organic Chemistry  
and Technology, Faculty of Bioscience Engineering, Ghent University,  
Coupure links 653, B-9000 Ghent, Belgium

Chris.Stevens@UGent.be

## Contents

|                                                                                                     |    |
|-----------------------------------------------------------------------------------------------------|----|
| General procedure 1: synthesis of dithiocarboimidates <b>7a-7f</b> .....                            | 3  |
| diallylprop-2-ynyl dithiocarboimide <b>7a</b> .....                                                 | 3  |
| bis(2-methylallyl)prop-2-ynyl dithiocarboimide <b>7b</b> .....                                      | 3  |
| Di(but-2-enyl)prop-2-ynyl dithiocarboimide <b>7c</b> .....                                          | 3  |
| bis(3-methylbut-2-enyl)prop-2-ynyl dithiocarboimide <b>7d</b> .....                                 | 4  |
| bis(2-bromo-allyl)prop-2-ynyl dithiocarboimide <b>7e</b> .....                                      | 4  |
| bis((Z)-3-phenylallyl)prop-2-ynyl dithiocarboimide <b>7f</b> .....                                  | 4  |
| General procedure 2: synthesis of dihydrothiazoles <b>9a-9f</b> .....                               | 5  |
| (E)-2-(thioallyl)-5-(but-3-enylidene)-4,5-dihydrothiazole <b>9a</b> .....                           | 5  |
| (E)-2-(thio-2-methylallyl)-5-(3-methylbut-3-enylidene)-4,5-dihydrothiazole <b>9b</b> .....          | 5  |
| (5E)-2-(thiobut-2-enyl)-5-(2-methylbut-3-enylidene)-4,5-dihydrothiazole <b>9c</b> .....             | 5  |
| (E)-5-(2,2-dimethylbut-3-enylidene)-2-(thio-3-methylbut-2-enyl)-4,5-dihydrothiazole <b>9d</b> ..... | 6  |
| (E)-2-(thio-2-bromoallyl)-5-(3-bromo-but-3-enylidene)-4,5-dihydrothiazole <b>9e</b> .....           | 6  |
| (E)-2-(cinnamylthio)-5-(2-phenylbut-3-enylidene)-4,5-dihydrothiazole <b>9f</b> .....                | 6  |
| Copy of <sup>1</sup> H-NMR <b>7a</b> .....                                                          | 7  |
| Copy of <sup>13</sup> C-NMR <b>7a</b> .....                                                         | 8  |
| Copy of <sup>1</sup> H-NMR <b>7b</b> .....                                                          | 9  |
| Copy of <sup>13</sup> C-NMR <b>7b</b> .....                                                         | 10 |
| Copy of <sup>1</sup> H-NMR <b>7c</b> .....                                                          | 11 |
| Copy of <sup>13</sup> C-NMR <b>7c</b> .....                                                         | 12 |
| Copy of <sup>1</sup> H-NMR <b>7d</b> .....                                                          | 13 |
| Copy of <sup>13</sup> C-NMR <b>7d</b> .....                                                         | 14 |
| Copy of <sup>1</sup> H-NMR <b>7e</b> .....                                                          | 15 |
| Copy of <sup>13</sup> C-NMR <b>7e</b> .....                                                         | 16 |
| Copy of <sup>1</sup> H-NMR <b>7f</b> .....                                                          | 17 |
| Copy of <sup>13</sup> C-NMR <b>7f</b> .....                                                         | 18 |
| Copy of <sup>1</sup> H-NMR <b>9a</b> .....                                                          | 19 |
| Copy of <sup>13</sup> C-NMR <b>9a</b> .....                                                         | 20 |
| Copy of <sup>1</sup> H-NMR <b>9b</b> .....                                                          | 21 |
| Copy of <sup>13</sup> C-NMR <b>9b</b> .....                                                         | 22 |
| Copy of <sup>1</sup> H-NMR <b>9c</b> .....                                                          | 23 |
| Copy of <sup>13</sup> C-NMR <b>9c</b> .....                                                         | 24 |
| Copy of <sup>1</sup> H-NMR <b>9d</b> .....                                                          | 25 |

|                                              |    |
|----------------------------------------------|----|
| Copy of $^{13}\text{C}$ -NMR <b>9d</b> ..... | 26 |
| Copy of $^1\text{H}$ -NMR <b>9e</b> .....    | 27 |
| Copy of $^{13}\text{C}$ -NMR <b>9e</b> ..... | 28 |
| Copy of $^1\text{H}$ -NMR <b>9f</b> .....    | 29 |
| Copy of $^{13}\text{C}$ -NMR <b>9f</b> ..... | 30 |

### General procedure 1: synthesis of dithiocarboimidates 7a-7f

In a dry 50 ml flask 0,600 g (10,9 mmol, 1 equiv) propargylamine is dissolved in 30 ml of hexane. To this 11 g (109 mmol, 10 equiv) Et<sub>3</sub>N is added. The flask is placed under inert atmosphere and is cooled to 0°C in order to buffer the exothermic reaction. Slowly 1,26 g (16,4 mmol, 1,5 equiv) carbondisulfide is added, using a syringe. The cooling baths is removed, and the reaction is allowed to stir at room temperature for one hour. A white suspension is formed. Subsequently, 8 equivalents of an allylic bromide are added and the reaction is stirred at room temperature during an overnight period. The extraction is performed from aqueous saturated NaHCO<sub>3</sub> by means of dichloromethane (3x). The combined organic phases are dried using MgSO<sub>4</sub> and the volatiles are removed by rotary evaporation. Further purification is performed by means of column chromatography when the allylic bromide could not be evaporated.

#### diallylprop-2-ynyl dithiocarboimide 7a

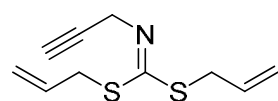

<sup>1</sup>H-NMR (300MHz, CDCl<sub>3</sub>): δ 2.26 (1H, t, J=2.8Hz, C<sub>q</sub>≡CH); 3.67 (2H, d, J=7.2Hz, SCH<sub>2</sub>); 3.72 (2H, d, J=6.6Hz, SCH<sub>2</sub>); 4.23 (2H, d, J=2.8Hz, NCH<sub>2</sub>); 5.08 (1H, d, J=9.9Hz, CH=CH<sub>E</sub>H<sub>2</sub>); 5.15 (1H, d, J=9.9Hz, CH=CH<sub>E</sub>H<sub>2</sub>); 5.23 (1H, d, J=16.5Hz, CH=CH<sub>E</sub>H<sub>2</sub>); 5.28 (1H, d, J=15.7Hz, CH=CH<sub>E</sub>H<sub>2</sub>); 5.79-5.94 (2H, m, 2x CH=CH<sub>2</sub>). <sup>13</sup>C-NMR (75MHz, CDCl<sub>3</sub>): δ 34.5 (SCH<sub>2</sub>); 35.5 (SCH<sub>2</sub>); 42.3 (C<sub>q</sub>CH<sub>2</sub>); 71.1 (C<sub>q</sub>≡CH); 81.6 (C<sub>q</sub>≡CH); 118.3 (CH=CH<sub>2</sub>); 119.0 (CH=CH<sub>2</sub>); 132.7 (CH=CH<sub>2</sub>); 133.0 (CH=CH<sub>2</sub>); 159.7 (NC<sub>q</sub>S<sub>2</sub>). MS (ESI): m/z (%): 212 (M + H<sup>+</sup>, 100). HRMS (ESI): m/z calcd for C<sub>10</sub>H<sub>13</sub>NS<sub>2</sub> + H<sup>+</sup> = 212.0568, found = 212.0571. IR (cm<sup>-1</sup>) v<sub>max</sub>: 1567 (N=CS<sub>2</sub>); 1636 (CH=CH<sub>2</sub>); 3296 (C≡CH). Chromatography: PE/EtOAc 95/5 R<sub>f</sub> = 0.20. Y: 78%.

#### bis(2-methylallyl)prop-2-ynyl dithiocarboimide 7b

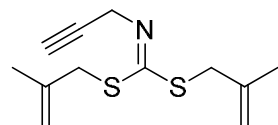

<sup>1</sup>H-NMR (300MHz, CDCl<sub>3</sub>): δ 1.80 (3H, s, CH<sub>3</sub>); 1.84 (3H, s, CH<sub>3</sub>); 2.26 (1H, t, J=2.5Hz, HC≡C<sub>q</sub>); 3.72 (2H, s, SCH<sub>2</sub>); 3.74 (2H, s, SCH<sub>2</sub>); 4.29 (2H, d, J=2.5Hz, NCH<sub>2</sub>); 4.86 (1H, s, C<sub>q</sub>=CH<sub>a</sub>H<sub>b</sub>); 4.92 (1H, s, C<sub>q</sub>=CH<sub>a</sub>H<sub>b</sub>); 4.97 (1H, s, C<sub>q</sub>=CH<sub>a</sub>H<sub>b</sub>); 5.03 (1H, s, C<sub>q</sub>=CH<sub>a</sub>H<sub>b</sub>). <sup>13</sup>C-NMR (75MHz, CDCl<sub>3</sub>): δ 21.4 (CH<sub>3</sub>); 21.6 (CH<sub>3</sub>); 38.5 (SCH<sub>2</sub>); 39.8 (SCH<sub>2</sub>); 42.3 (NCH<sub>2</sub>); 70.8 (HC≡C<sub>q</sub>); 81.1 (HC≡C<sub>q</sub>); 114.6 (H<sub>2</sub>C=C<sub>q</sub>); 115.3 (H<sub>2</sub>C=C<sub>q</sub>); 140.0 (H<sub>2</sub>C=C<sub>q</sub>); 140.7 (H<sub>2</sub>C=C<sub>q</sub>); 160.9 (NC<sub>q</sub>S<sub>2</sub>). MS (ESI): m/z (%): 240.3 (M + H<sup>+</sup>, 100). HRMS (ESI): m/z calcd for C<sub>12</sub>H<sub>17</sub>NS<sub>2</sub> + H<sup>+</sup> = 240.0881, found = 240.0885. IR (cm<sup>-1</sup>) v<sub>max</sub>: 1568 (N=CS<sub>2</sub>); 1649 (C=CH<sub>2</sub>); 3298 (C≡CH). Y: 89%.

#### Di(but-2-enyl)prop-2-ynyl dithiocarboimide 7c

An inseparable mixture of EE, EZ and ZZ **7c** was characterised.

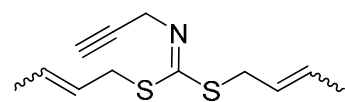

<sup>1</sup>H-NMR (300MHz, CDCl<sub>3</sub>): δ 1.70 (6H, m, 2x CH<sub>3</sub>, EE of 2x CH<sub>3</sub>, EZ of 2x CH<sub>3</sub>, ZZ); 2.27 (1H, ~t, J=2.2Hz, C<sub>q</sub>≡CH); 3.65 (2H, d, J=6.1Hz, SC<sub>a,E</sub>H<sub>2</sub>); 3.70 (2H, d, J=7.2Hz, SC<sub>b,E</sub>H<sub>2</sub>); 3.73 (2H, d, J=7.2Hz, SC<sub>a,Z</sub>H<sub>2</sub>); 3.78 (2H, d, J=7.7Hz, SC<sub>b,Z</sub>H<sub>2</sub>); 4.26 (2H, d, J=2.2Hz, C<sub>q</sub>CH<sub>2</sub>); 5.47-5.57 (2H, m, 2x CH<sub>2</sub>CH<sub>3</sub>); 5.60-5.79 (2H, m, 2x CH<sub>2</sub>CH). <sup>13</sup>C-NMR (75MHz, CDCl<sub>3</sub>): δ 13.0 (C<sub>Z</sub>H<sub>3</sub>); 17.9 (C<sub>E</sub>H<sub>3</sub>); 28.7 (SC<sub>a,Z</sub>H<sub>2</sub>); 29.3 (SC<sub>b,Z</sub>H<sub>2</sub>); 34.0 (SC<sub>a,E</sub>H<sub>2</sub>); 34.9 (SC<sub>b,E</sub>H<sub>2</sub>); 42.1 (C<sub>q</sub>CH<sub>2</sub>); 70.9 (C<sub>q</sub>≡CH); 81.2 (C<sub>q</sub>≡CH); 124.2 (CH<sub>2</sub>C<sub>a</sub>H, EZ); 124.3 (CH<sub>2</sub>C<sub>a</sub>H, ZZ); 124.4 (CH<sub>2</sub>C<sub>b</sub>H, EZ); 125.27 (CH<sub>2</sub>C<sub>a</sub>H, EE); 125.35 (CH<sub>2</sub>C<sub>b</sub>H, ZZ); 125.4 (CH<sub>2</sub>C<sub>b</sub>H, EE); 128.5 (C<sub>a</sub>HCH<sub>3</sub>, EZ); 128.6 (C<sub>a</sub>HCH<sub>3</sub>, ZZ); 129.2 (C<sub>b</sub>HCH<sub>3</sub>, EZ); 129.67 (C<sub>a</sub>HCH<sub>3</sub>, EE); 129.71 (C<sub>b</sub>HCH<sub>3</sub>, ZZ); 130.4 (C<sub>b</sub>HCH<sub>3</sub>, EE); 160.6 (NC<sub>q</sub>S<sub>2</sub>, EE); 160.8 (NC<sub>q</sub>S<sub>2</sub>, EZ); 160.9 (NC<sub>q</sub>S<sub>2</sub>, ZZ). MS (ESI): m/z (%): 240 (M + H<sup>+</sup>, 100).

**HRMS (ESI):**  $m/z$  calcd for  $C_{12}H_{17}NS_2 + H^+ = 240.0880$ , found = 240.0879. **IR (cm<sup>-1</sup>) v<sub>max</sub>:** 1561 (N=CS<sub>2</sub>); 1698 (HC=CH); 3292 (C≡CH). **Y:** 79%.

**bis(3-methylbut-2-enyl)prop-2-ynyl dithiocarboimidate 7d**

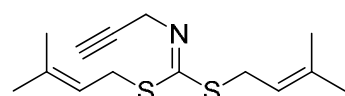

**<sup>1</sup>H-NMR (300MHz, CDCl<sub>3</sub>):**  $\delta$  1.70 (6H, s, 2x C<sub>q</sub>C<sub>2</sub>H<sub>3</sub>); 1.74 (6H, s, 2x C<sub>q</sub>C<sub>E</sub>H<sub>3</sub>); 2.27 (1H, t, J=2.2Hz, C<sub>q</sub>≡CH); 3.69 (2H, d, J=8.3Hz, SCH<sub>2</sub>); 3.74 (2H, d, J=7.7Hz, SCH<sub>2</sub>); 4.24 (2H, d, J=2.2Hz, C<sub>q</sub>CH<sub>2</sub>); 5.23-5.31 (2H, m, 2x SCH<sub>2</sub>CH). **<sup>13</sup>C-NMR (75MHz, CDCl<sub>3</sub>):**  $\delta$  17.9 (2x C<sub>q</sub>C<sub>Z</sub>H<sub>3</sub>); 25.8 (2x C<sub>q</sub>C<sub>E</sub>H<sub>3</sub>); 30.2 (SCH<sub>2</sub>); 30.8 (SCH<sub>2</sub>); 42.1 (NCH<sub>2</sub>); 70.7 (C<sub>q</sub>≡CH); 81.3 (C<sub>q</sub>≡CH); 118.1 (SCH<sub>2</sub>CH); 118.2 (SCH<sub>2</sub>CH); 137.2 (C<sub>q</sub>(CH<sub>3</sub>)<sub>2</sub>); 138.0 (C<sub>q</sub>(CH<sub>3</sub>)<sub>2</sub>); 161.7 (NCS<sub>2</sub>). **MS (ESI):**  $m/z$  (%): 268 (M + H<sup>+</sup>, 100). **HRMS (ESI):**  $m/z$  calcd for  $C_{14}H_{21}NS_2 + H^+ = 268.1193$ , found = 268.1201. **IR (cm<sup>-1</sup>) v<sub>max</sub>:** 1570 (N=CS<sub>2</sub>); 1666 (HC=C); 3294 (C≡CH).

**Chromatography:** Hex/EtOAc 95/5 R<sub>f</sub> = 0.41. **Y:** 88%.

**bis(2-bromo-allyl)prop-2-ynyl dithiocarboimidate 7e**

Freshly distilled bromide must be used. The isolated product is to be used for ring closure immediately.

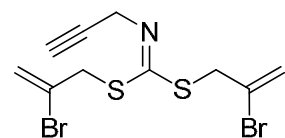

**<sup>1</sup>H-NMR (300MHz, CDCl<sub>3</sub>):**  $\delta$  2.28 (1H, t, J=2.8Hz, HC≡C<sub>q</sub>); 4.06 (2H, s, SCH<sub>2</sub>); 4.07 (2H, s, SCH<sub>2</sub>); 4.34 (2H, d, J=2.8Hz, NCH<sub>2</sub>); 5.51 (1H, d, J=1.4Hz, C<sub>q</sub>=CH<sub>a</sub>H<sub>b</sub>); 5.60 (1H, d, J=2.2Hz, C<sub>q</sub>=CH<sub>a</sub>H<sub>b</sub>); 5.90 (1H, ~d, J=1.4Hz, C<sub>q</sub>=CH<sub>a</sub>H<sub>b</sub>); 5.98 (1H, ~d, J=2.2Hz, C<sub>q</sub>=CH<sub>a</sub>H<sub>b</sub>). **<sup>13</sup>C-NMR (75MHz, CDCl<sub>3</sub>):**  $\delta$  41.4 (NCH<sub>2</sub>); 42.67 (SCH<sub>2</sub>); 42.71 (SCH<sub>2</sub>); 71.3 (CH≡C<sub>q</sub>); 80.6 (CH≡C<sub>q</sub>); 120.6 (2x C<sub>q</sub>=CH<sub>2</sub>); 127.6 (2x C<sub>q</sub>Br); 157.9 (NCS<sub>2</sub>). **MS (ESI):**  $m/z$  (%): 368 (M + H<sup>+</sup>, 40); 370 (M + H<sup>+</sup>, 100); 372 (M + H<sup>+</sup>, 60). **HRMS (ESI):**  $m/z$  calcd for  $C_{10}H_{11}Br_2NS_2 + H^+ = 369.8757$ , found = 369.8754. **IR (cm<sup>-1</sup>) v<sub>max</sub>:** 1576 (N=CS<sub>2</sub>); 1623 (C=CH<sub>2</sub>); 3295 (C≡CH). **Chromatography:** PE/EtOAc 95/5 R<sub>f</sub> = 0.38. **Y:** 80%.

**bis((Z)-3-phenylallyl)prop-2-ynyl dithiocarboimidate 7f**

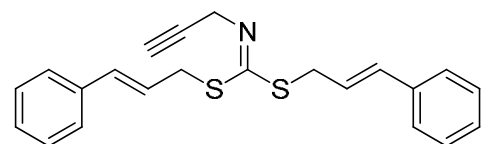

**<sup>1</sup>H-NMR (300MHz, CDCl<sub>3</sub>):**  $\delta$  2.27 (1H, t, J=2.5Hz, HC≡C<sub>q</sub>); 3.89 (2H, d, J=7.2Hz, SCH<sub>2</sub>); 3.92 (2H, d, J=7.2Hz, SCH<sub>2</sub>); 4.31 (2H, d, J=2.5Hz, NCH<sub>2</sub>); 6.23 (1H, dt, J=15.7Hz, J=7.2Hz, SCH<sub>2</sub>CH); 3.24 (1H, dt, J=15.7Hz, J=7.2Hz, SCH<sub>2</sub>CH); 6.60 (2H, ~d, J=15.7Hz, 2x CH<sub>2</sub>CH=CH); 7.26-7.38 (10H, m, 10x CH<sub>arom.</sub>). **<sup>13</sup>C-NMR (75MHz, CDCl<sub>3</sub>):**  $\delta$  34.5 (SCH<sub>2</sub>); 35.5 (SCH<sub>2</sub>); 42.4 (NCH<sub>2</sub>); 71.0 (HC≡C<sub>q</sub>); 81.2 (HC≡C<sub>q</sub>); 123.8 (SCH<sub>2</sub>CH); 124.2 (SCH<sub>2</sub>CH); 126.5 (2x C<sub>q</sub>CH<sub>arom.</sub> ortho); 126.6 (2x C<sub>q</sub>CH<sub>arom.</sub> ortho); 127.7 (CH<sub>arom.</sub> para); 128.1 (CH<sub>arom.</sub> para); 128.7 (2x CH<sub>arom.</sub> meta); 128.7 (2x CH<sub>arom.</sub> meta); 133.7 (CH=C<sub>q</sub>CH); 134.2 (CH=C<sub>q</sub>CH); 136.4 (C<sub>q, arom.</sub>); 136.9 (C<sub>q, arom.</sub>); 169.2 (NCS<sub>2</sub>). **MS (ESI):**  $m/z$  (%): 364 (M + H<sup>+</sup>, 100). **HRMS (ESI):**  $m/z$  calcd for  $C_{22}H_{21}NS_2 - H^+ = 362.1037$ , found = 362.1045. **IR (cm<sup>-1</sup>) v<sub>max</sub>:** 1566 (N=CS<sub>2</sub>); 1672 (CH<sub>arom.</sub>); 3288 (C≡CH). **Chromatography:** Hex/EtOAc 98/2 R<sub>f</sub> = 0.20. **Y:** 81%.

### General procedure 2: synthesis of dihydrothiazoles 9a-9f

In a dry 25 ml flask under inert atmosphere, dithiocarboimidate **7** is dissolved in dry dichloromethane. Subsequently 0.05 equivalents of AuCl<sub>3</sub> is added and the reaction is stirred at room temperature for 15 minutes. The reaction mixture is filtered over a small plug of silica gel and after evaporation of the volatiles, dihydrothiazoles **9** are obtained.

#### (E)-2-(thioallyl)-5-(but-3-enylidene)-4,5-dihydrothiazole 9a

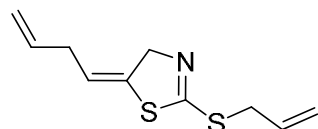

<sup>1</sup>H-NMR (300MHz, CDCl<sub>3</sub>): δ 2.76 (2H, dd, J=7.7Hz, J=6.1Hz, HCCH<sub>2</sub>CH); 3.76 (2H, d, J=6.6Hz, SCH<sub>2</sub>); 4.83 (2H, ~d, J=3.0Hz, NCH<sub>2</sub>); 5.01 (1H, ~dd, J=9.9Hz, J=1.1Hz, CHCH<sub>2</sub>CH=CH<sub>E</sub>H<sub>Z</sub>); 5.06 (1H, ~dd, J=17.1Hz, J=1.1Hz, CHCH<sub>2</sub>CH=CH<sub>E</sub>H<sub>Z</sub>); 5.15 (1H, dd, J=9.9Hz, J=1.1Hz, SCH<sub>2</sub>CH=CH<sub>E</sub>H<sub>Z</sub>); 5.28 (1H, dd, J=17.1, J=1.1Hz, SCH<sub>2</sub>CH=CH<sub>E</sub>H<sub>Z</sub>); 5.50 (1H, tt, J=7.7Hz, J=3.0Hz, C<sub>q</sub>=CH); 5.76 (1H, ddt, J=17.1Hz, J=9.9Hz, J=6.1Hz, C<sub>q</sub>CHCH<sub>2</sub>CH); 5.93 (1H, ddt, J=17.1Hz, J=9.9Hz, J=6.6Hz, SCH<sub>2</sub>CH). <sup>13</sup>C-NMR (75MHz, CDCl<sub>3</sub>): δ 34.3 (HCCH<sub>2</sub>CH); 34.7 (SCH<sub>2</sub>); 67.1 (NCH<sub>2</sub>); 115.6 (CH=CH<sub>2</sub>); 116.1 (C<sub>q</sub>=CH); 118.7 (SCH<sub>2</sub>CH=CH<sub>2</sub>); 132.7 (SCH<sub>2</sub>CH); 135.0 (HCCH<sub>2</sub>CH=CH<sub>2</sub>); 139.8 (SC<sub>q</sub>CH<sub>2</sub>); 163.1 (NC<sub>q</sub>S<sub>2</sub>). MS (ESI): m/z (%): 212 (M + H<sup>+</sup>, 100). HRMS (ESI): m/z calcd for C<sub>10</sub>H<sub>13</sub>NS<sub>2</sub> + H<sup>+</sup> = 212.0567, found = 212.0564. IR (cm<sup>-1</sup>) v<sub>max</sub>: 1573 (N=CS<sub>2</sub>); 1637 (HC=CH<sub>2</sub>). Y: 92%.

#### (E)-2-(thio-2-methylallyl)-5-(3-methylbut-3-enylidene)-4,5-dihydrothiazole 9b

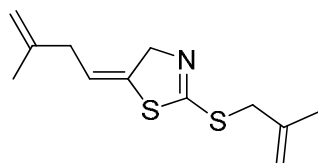

<sup>1</sup>H-NMR (300MHz, CDCl<sub>3</sub>): δ 1.73 (3H, s, CH<sub>3</sub>); 1.84 (3H, s, CH<sub>3</sub>); 2.71 (2H, d, J=7.7Hz, CHCH<sub>2</sub>); 3.79 (2H, s, SCH<sub>2</sub>); 4.72 (1H, s, CHCH<sub>2</sub>C<sub>q</sub>=CH<sub>a</sub>H<sub>b</sub>); 4.74 (1H, s, CHCH<sub>2</sub>C<sub>q</sub>=CH<sub>a</sub>H<sub>b</sub>); 4.85 (2H, ~d, J=3.0Hz, NCH<sub>2</sub>); 4.91 (1H, s, SCH<sub>2</sub>C<sub>q</sub>CH<sub>a</sub>H<sub>b</sub>); 5.02 (1H, s, SCH<sub>2</sub>C<sub>q</sub>CH<sub>a</sub>H<sub>b</sub>); 5.54 (1H, tt, J=7.7Hz, J=3.0Hz, SC<sub>q</sub>=CH). <sup>13</sup>C-NMR (75MHz, CDCl<sub>3</sub>): δ 21.5 (CH<sub>3</sub>); 22.5 (CH<sub>3</sub>); 38.6 (CHCH<sub>2</sub>); 38.8 (SCH<sub>2</sub>); 66.9 (NCH<sub>2</sub>); 111.1 (C<sub>q</sub>=CH<sub>2</sub>); 114.9 (C<sub>q</sub>=CH<sub>2</sub>); 116.6 (C<sub>q</sub>=CHCH<sub>2</sub>); 139.7 (C<sub>q</sub>=CH<sub>2</sub>); 140.2 (C<sub>q</sub>=CH<sub>2</sub>); 143.1 (SC<sub>q</sub>=CH); 163.8 (NC<sub>q</sub>S<sub>2</sub>). MS (ESI): m/z (%): 240 (M + H<sup>+</sup>, 100). HRMS (ESI): m/z calcd for C<sub>12</sub>H<sub>17</sub>NS<sub>2</sub> + H<sup>+</sup> = 240.0881, found = 240.0875. IR (cm<sup>-1</sup>) v<sub>max</sub>: 1575 (N=CS<sub>2</sub>); 1651 (C=CH<sub>2</sub>). Y: 93%.

#### (5E)-2-(thiobut-2-enyl)-5-(2-methylbut-3-enylidene)-4,5-dihydrothiazole 9c

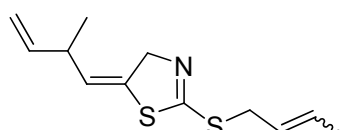

<sup>1</sup>H-NMR (300MHz, CDCl<sub>3</sub>): δ 1.10 (3H, d, J=6.6Hz, CHCH<sub>3</sub>); 1.69 (3H, 2x d, J=6.0Hz, CH<sub>2</sub>CH=CHCH<sub>3</sub>, E and Z); 2.89 (1H, m, C<sub>q</sub>=CHCHCH<sub>3</sub>); 3.72 (2H, d, J=6.6Hz, SCH<sub>2</sub>, E); 3.80 (2H, d, J=7.7Hz, SCH<sub>2</sub>, Z); 4.85 (2H, m, NCH<sub>2</sub>); 5.34 (1H, dt, J=9.4Hz, J=3.0Hz, C<sub>q</sub>=CH); 5.50-5.75 (3H, m, CH=CH, CH=CH<sub>2</sub>). <sup>13</sup>C-NMR (75MHz, CDCl<sub>3</sub>): δ 13.0 (CH<sub>2</sub>CH=CHC<sub>Z</sub>H<sub>3</sub>); 17.9 (CH<sub>2</sub>CH=CHC<sub>E</sub>H<sub>3</sub>); 20.3 (C<sub>q</sub>=CHCHCH<sub>3</sub>); 28.8 (SCH<sub>2</sub>, Z); 34.2 (SCH<sub>2</sub>, E); 39.3 (C<sub>q</sub>=CHCHCH<sub>3</sub>); 66.9 (NCH<sub>2</sub>); 113.2 (CH=CH<sub>2</sub>); 122.3 (C<sub>q</sub>=CH); 124.1 (=C<sub>Z,a</sub>H); 125.2 (=C<sub>E,a</sub>H); 129.1 (=C<sub>Z,b</sub>H); 130.2 (=C<sub>E,b</sub>H); 138.4 (SC<sub>q</sub>=CH); 140.8 (CH=CH<sub>2</sub>); 163.5 (NC<sub>q</sub>S<sub>2</sub>). MS (ESI): m/z (%): 240 (M + H<sup>+</sup>, 100). HRMS (ESI): m/z calcd for C<sub>12</sub>H<sub>17</sub>NS<sub>2</sub> + H<sup>+</sup> = 240.0881, found = 240.0889. IR (cm<sup>-1</sup>) v<sub>max</sub>: 1570 (N=CS<sub>2</sub>); 1637, 1667 (C=C). Y: 91%.

**(E)-5-(2,2-dimethylbut-3-enylidene)-2-(thio-3-methylbut-2-enyl)-4,5-dihydrothiazole 9d**

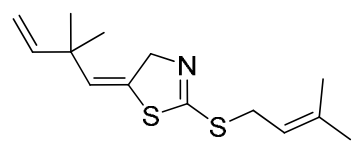

**<sup>1</sup>H-NMR (300MHz, CDCl<sub>3</sub>):** δ 1.16 (6H, s, C<sub>q</sub>(CH<sub>3</sub>)<sub>2</sub>); 1.69 (3H, s, HC=C<sub>q</sub>CH<sub>3</sub>); 1.73 (3H, s, HC=C<sub>q</sub>CH<sub>3</sub>); 3.74 (2H, d, J=7.7Hz, SCH<sub>2</sub>); 4.83 (2H, d, J=3.0Hz, NCH<sub>2</sub>); 5.01 (1H, d, J=17.6Hz, CH=CH<sub>E</sub>H<sub>Z</sub>); 5.05 (1H, d, J=9.9Hz, CH=CH<sub>E</sub>H<sub>Z</sub>); 5.30 (1H, t, 7.7Hz, SCH<sub>2</sub>CH); 5.50 (1H, t, J=3.0Hz, SC<sub>q</sub>=CH); 5.82 (1H, dd, J=17.6Hz, J=9.9Hz; C<sub>q</sub>CH=CH<sub>2</sub>). **<sup>13</sup>C-NMR (75MHz, CDCl<sub>3</sub>):** δ 17.9 (HC=C<sub>q</sub>CH<sub>3</sub>); 25.8 (HC=C<sub>q</sub>CH<sub>3</sub>); 27.6 (HCC<sub>q</sub>(CH<sub>3</sub>)<sub>2</sub>); 30.3 (SCH<sub>2</sub>); 40.1 (C<sub>q</sub>(CH)<sub>2</sub>); 66.4 (NCH<sub>2</sub>); 111.4 (HC=CH<sub>2</sub>); 118.0 (SCH<sub>2</sub>CH); 126.6 (SC<sub>q</sub>=CH); 137.9 (HC=C<sub>q</sub>(CH<sub>3</sub>)<sub>2</sub>); 139.4 (SC<sub>q</sub>=CH); 145.2 (HC=CH<sub>2</sub>); 163.2 (NC<sub>q</sub>S<sub>2</sub>). **MS (ESI): m/z (%):** 268 (M + H<sup>+</sup>, 100). **HRMS (ESI):** m/z calcd for C<sub>14</sub>H<sub>21</sub>NS<sub>2</sub> + H<sup>+</sup> = 268.1194, found = 268.1189. **IR (cm<sup>-1</sup>) v<sub>max</sub>:** 1572 (N=CS<sub>2</sub>); 1633, 1670 (C=C). **Y:** 92%.

**(E)-2-(thio-2-bromoallyl)-5-(3-bromo-but-3-enylidene)-4,5-dihydrothiazole 9e**

An analytically pure sample can be obtained only through three consecutive chromatographic steps. In this case, yield drops considerably to 51%.

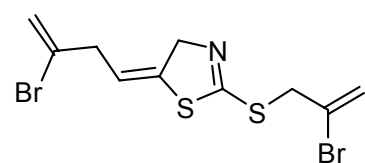

**<sup>1</sup>H-NMR (300MHz, CDCl<sub>3</sub>):** δ 3.15 (2H, d, J=7.7Hz, CHCH<sub>2</sub>); 4.12 (2H, s, SCH<sub>2</sub>); 4.85 (2H, m, NCH<sub>2</sub>); 5.43 (1H, d, J=1.8 Hz, C<sub>q</sub>=CH<sub>a</sub>H<sub>b</sub>); 5.51-5.55 (1H, m, SC<sub>q</sub>=CH); 5.56 (1H, d, J=1.8 Hz, C<sub>q</sub>=CH<sub>a</sub>H<sub>b</sub>); 5.63 (1H, d, J=1.8 Hz, C<sub>q</sub>=CH<sub>a</sub>H<sub>b</sub>); 5.95 (1H, d, J=1.8 Hz, C<sub>q</sub>=CH<sub>a</sub>H<sub>b</sub>). **<sup>13</sup>C-NMR (75MHz, CDCl<sub>3</sub>):** δ 41.2 (CHCH<sub>2</sub>); 42.1 (SCH<sub>2</sub>); 67.1 (NCH<sub>2</sub>); 114.4 (C<sub>q</sub>=CH<sub>2</sub>); 117.5 (C<sub>q</sub>=CH<sub>2</sub>); 120.4 (C<sub>q</sub>=CHCH<sub>2</sub>); 127.3 (C<sub>q</sub>=CH<sub>2</sub>); 130.7 (C<sub>q</sub>=CH<sub>2</sub>); 142.4 (SC<sub>q</sub>=CH); 162.1 (NC<sub>q</sub>S<sub>2</sub>). **MS (ESI): m/z (%):** 368 (M + H<sup>+</sup>, 45); 370 (M + H<sup>+</sup>, 100); 372 (M + H<sup>+</sup>, 55). **HRMS (ESI):** m/z calcd for C<sub>10</sub>H<sub>11</sub>Br<sub>2</sub>NS<sub>2</sub> + H<sup>+</sup> = 369.8757, found = 369.8762. **IR (cm<sup>-1</sup>) v<sub>max</sub>:** 1570 (N=CS<sub>2</sub>); 1631 (C=CH<sub>2</sub>). **Chromatography:** PE/EtOAc 95/5 R<sub>f</sub> = 0.21. **Y:** quant, purity 85%.

**(E)-2-(cinnamylthio)-5-(2-phenylbut-3-enylidene)-4,5-dihydrothiazole 9f**

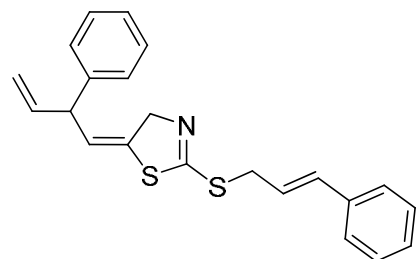

**<sup>1</sup>H-NMR (300MHz, CDCl<sub>3</sub>):** δ 3.94 (2H, d, J=7.2Hz, SCH<sub>2</sub>); 4.05 (1H, m, CHCH=CH<sub>2</sub>); 4.91 (2H, m, NCH<sub>2</sub>); 5.13 (1H, d, J=17.6Hz, CH=CH<sub>E</sub>H<sub>Z</sub>); 5.13 (1H, d, J=9.9Hz, CH=CH<sub>E</sub>H<sub>Z</sub>); 5.70 (1H, dt, J=9.4Hz, J=3.0Hz, SC<sub>q</sub>=CH); 5.94 (1H, ddd, J=17.6Hz, J=9.9Hz, J=6.6Hz, CHCH=CH<sub>2</sub>); 6.29 (1H, dt, J=15.6Hz, J=7.2Hz, SCH<sub>2</sub>CH); 6.60 (1H, d, 15.6Hz, CH<sub>2</sub>CH=CH); 7.20-7.38 (10H, m, CH<sub>arom.</sub>). **<sup>13</sup>C-NMR (75MHz, CDCl<sub>3</sub>):** δ 34.6 (SCH<sub>2</sub>); 50.5 (CH<sub>2</sub>=CHCH); 67.2 (NCH<sub>2</sub>); 115.4 (CHCH=CH<sub>2</sub>); 120.0 (SC<sub>q</sub>CH); 123.9 (SCH<sub>2</sub>CH); 126.6 (2x CH<sub>arom.</sub> ortho); 126.7 (CH<sub>arom.</sub> para); 127.6 (2x CH<sub>arom.</sub> meta); 128.0 (CH<sub>arom.</sub> para); 128.7 (2x CH<sub>arom.</sub> ortho); 128.9 (2x CH<sub>arom.</sub> meta); 133.9 (SCH<sub>2</sub>CH=CH); 136.6 (C<sub>q</sub>); 138.8 (CHCH=CH<sub>2</sub>); 139.9 (C<sub>q</sub>); 142.2 (C<sub>q</sub>); 163.4 (NC<sub>q</sub>S<sub>2</sub>). **MS (ESI): m/z (%):** 364 (M + H<sup>+</sup>, 100). **HRMS (ESI):** m/z calcd for C<sub>22</sub>H<sub>21</sub>NS<sub>2</sub> + H<sup>+</sup> = 364.1193, found = 364.1185. **IR (cm<sup>-1</sup>) v<sub>max</sub>:** 1573 (N=CS<sub>2</sub>); 1670 (C=C). **Chromatography:** PE/EtOAc 98/2 R<sub>f</sub> = 0.29. **Y:** 74%.

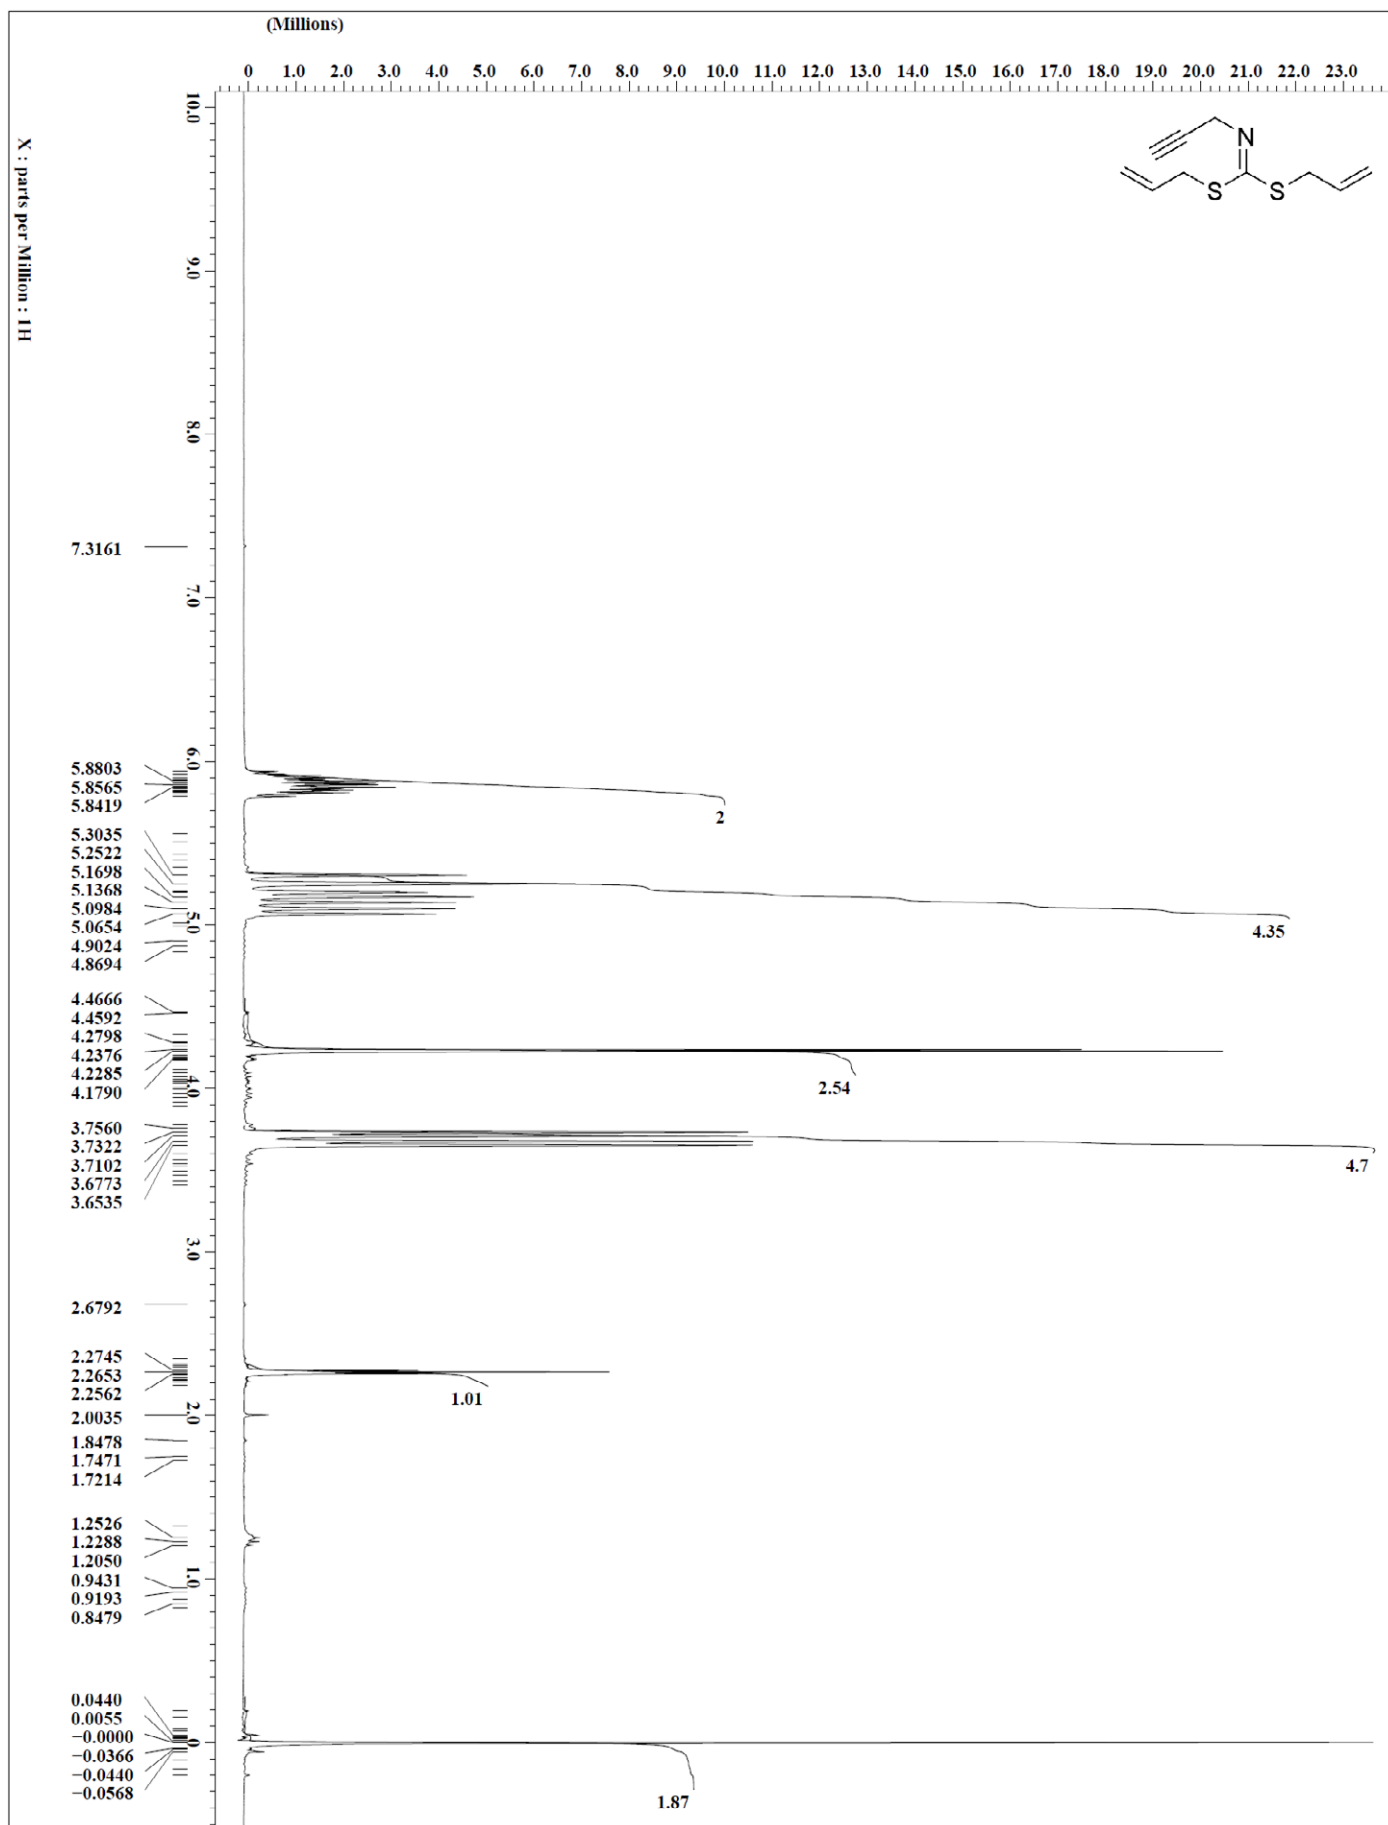

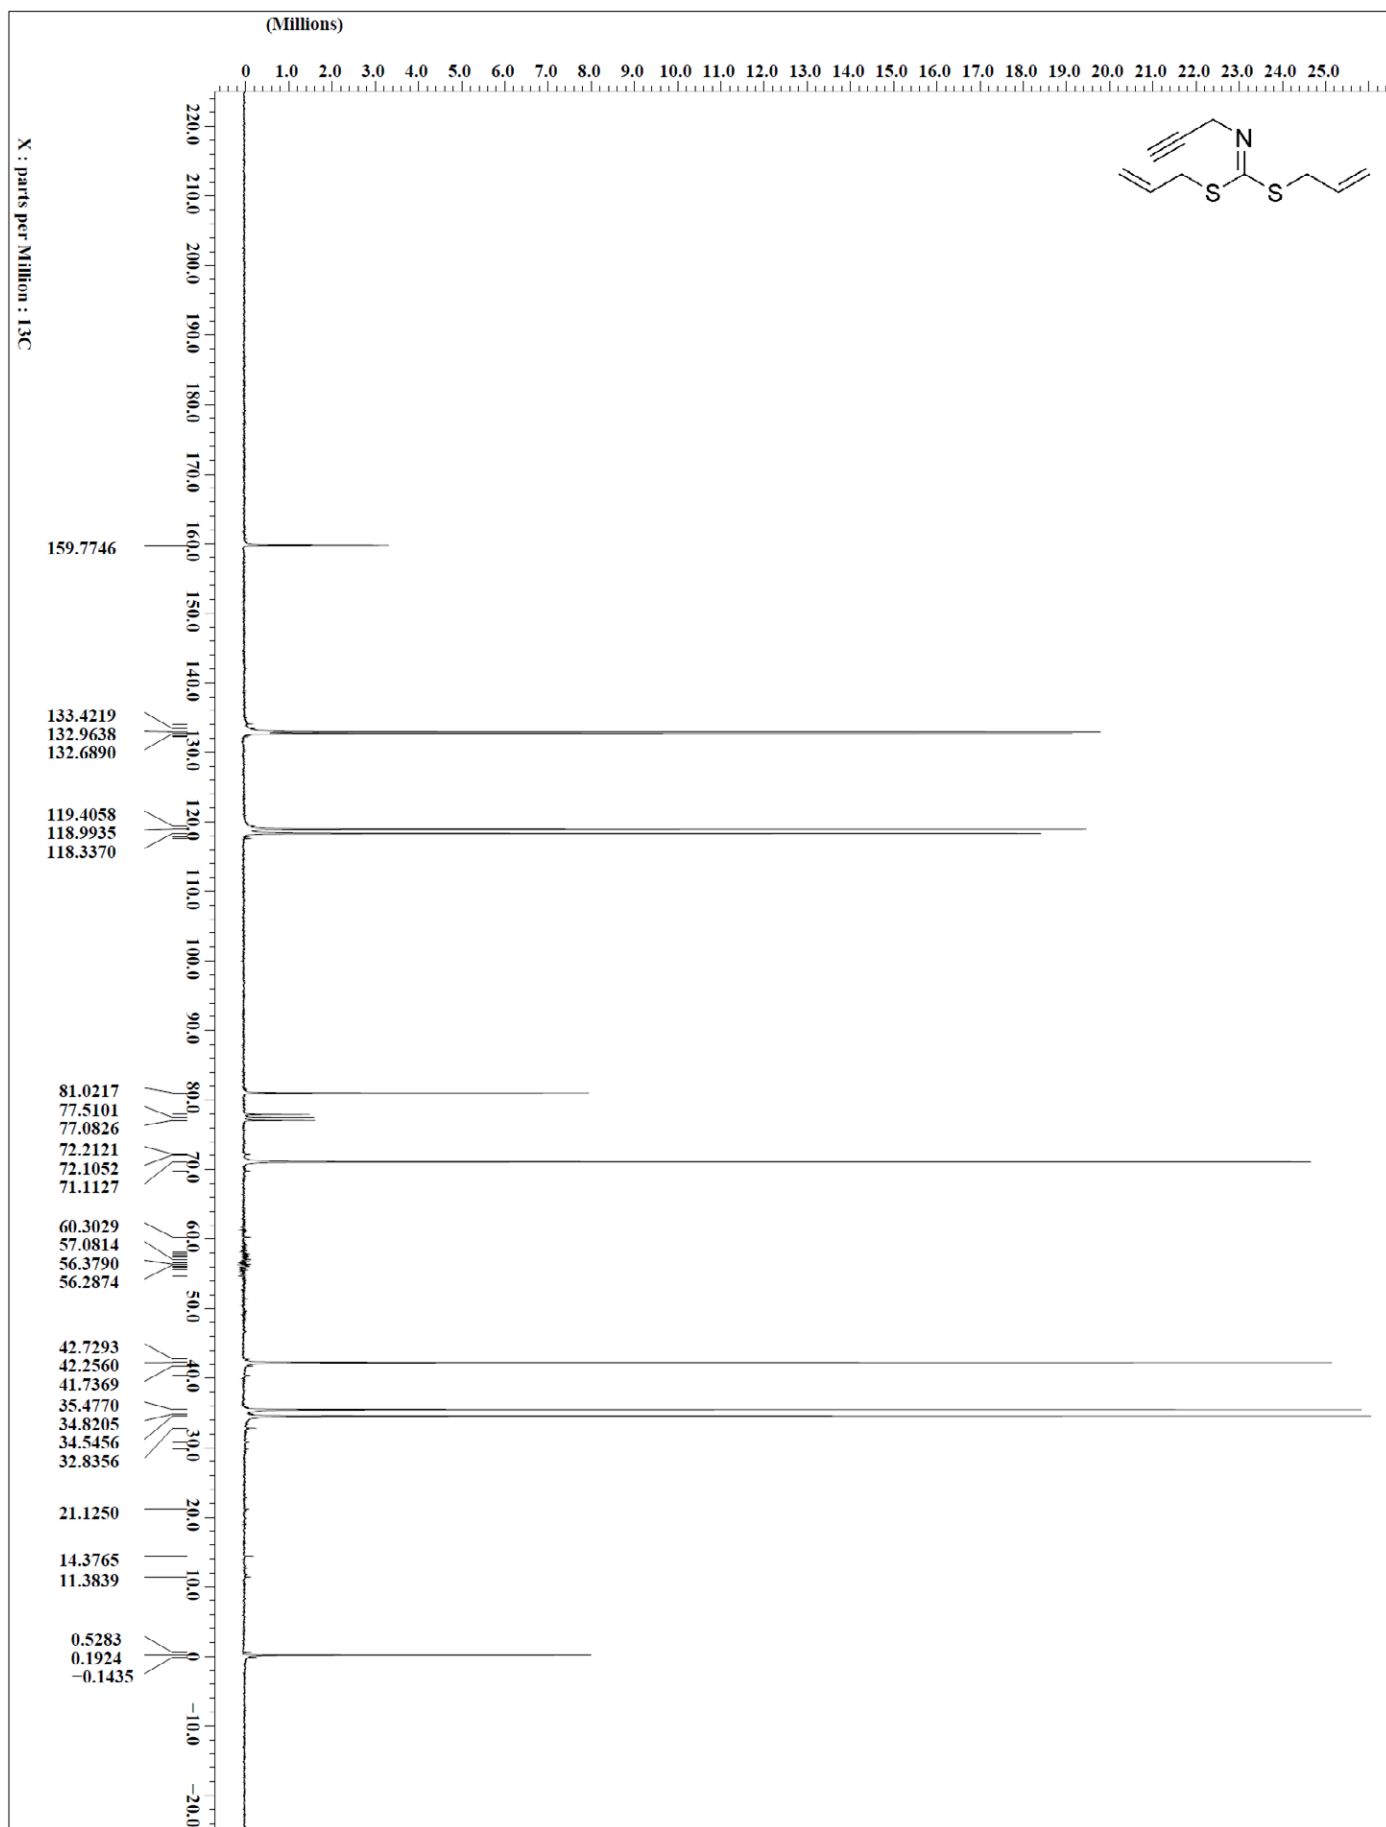



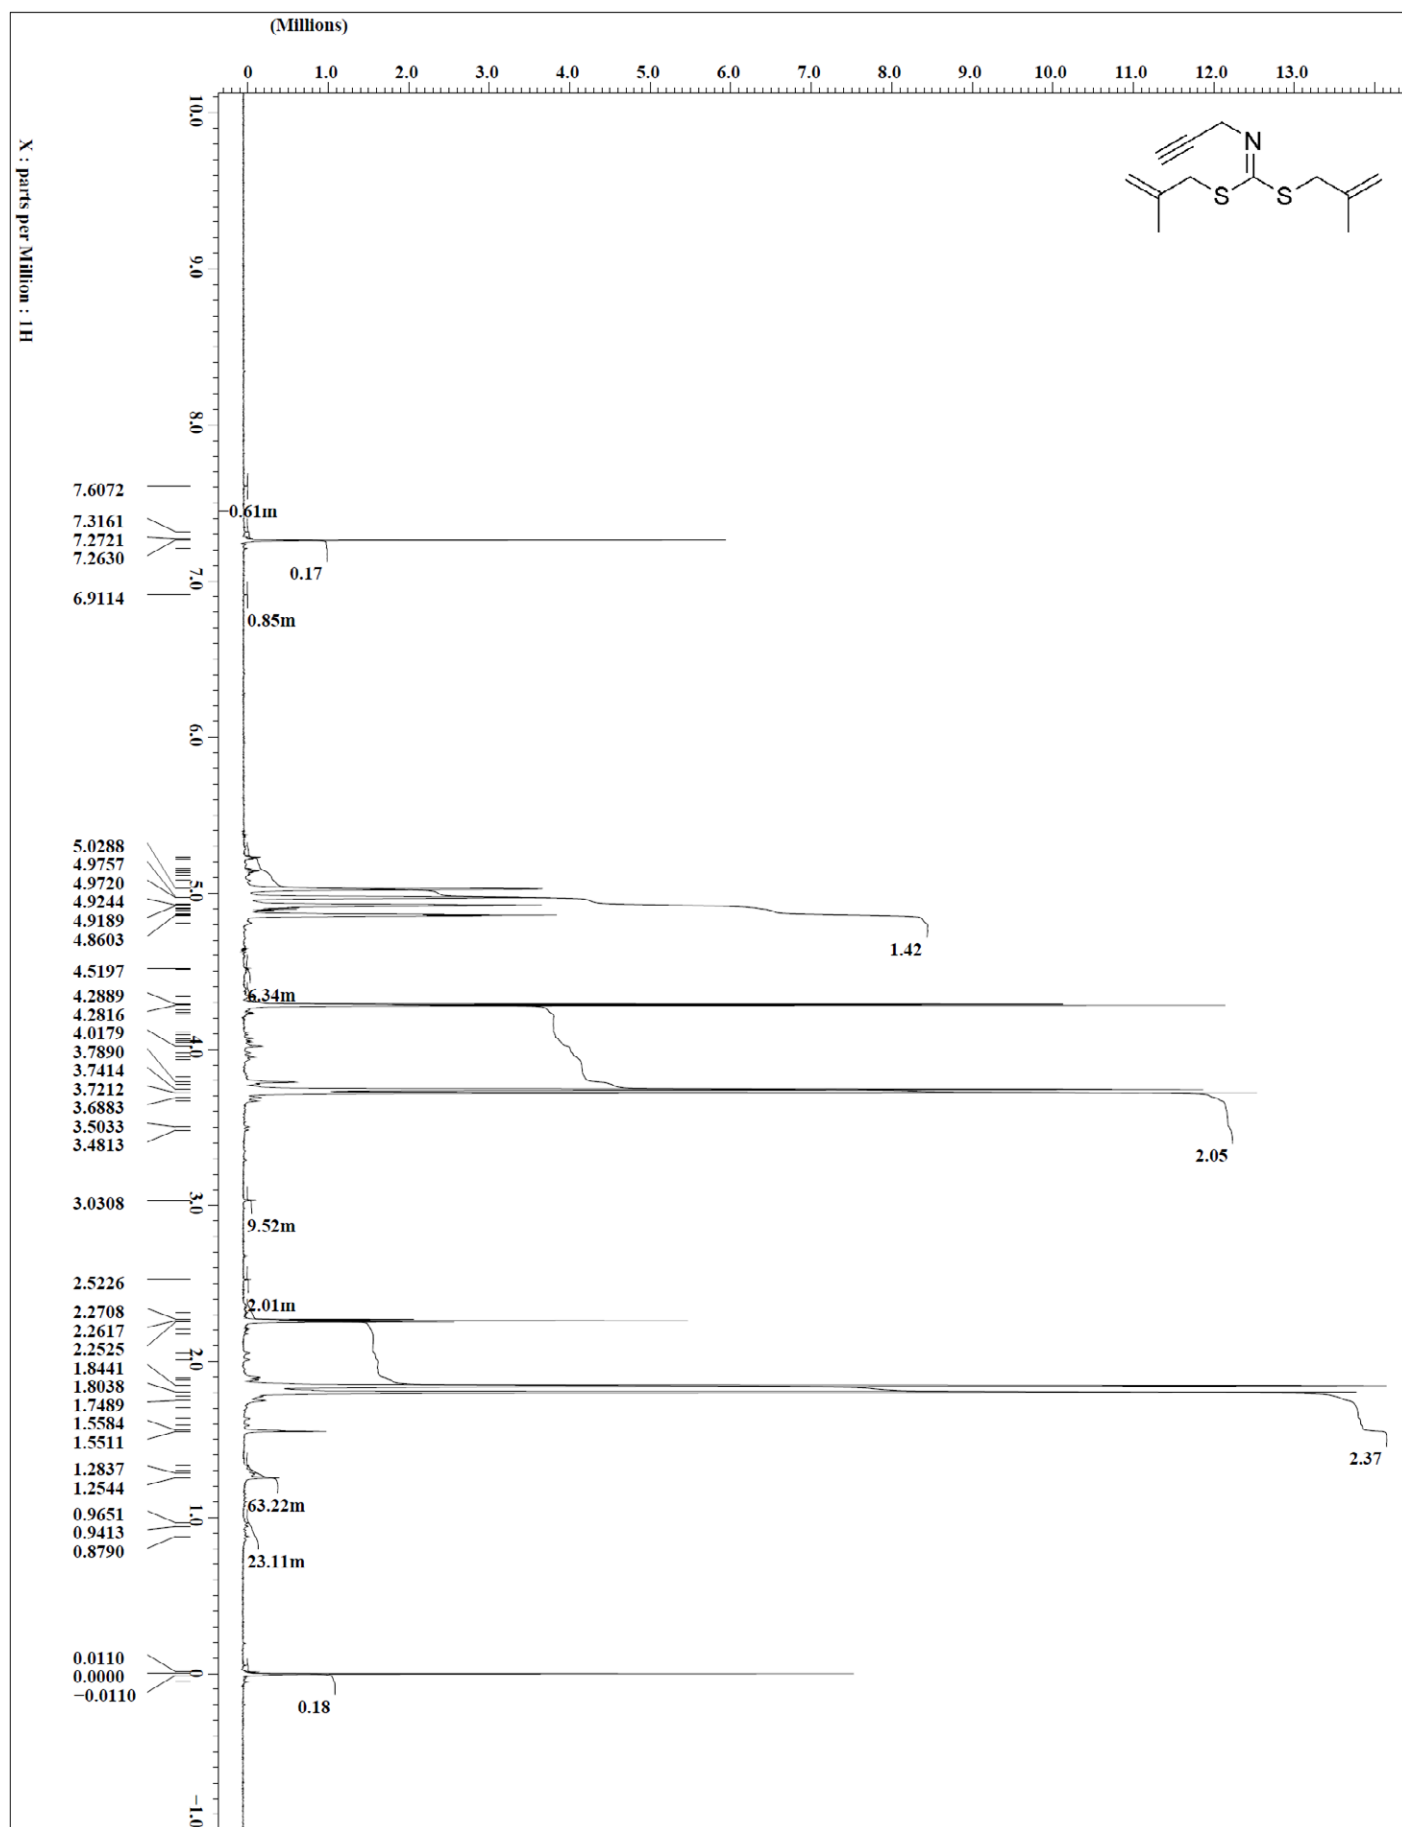

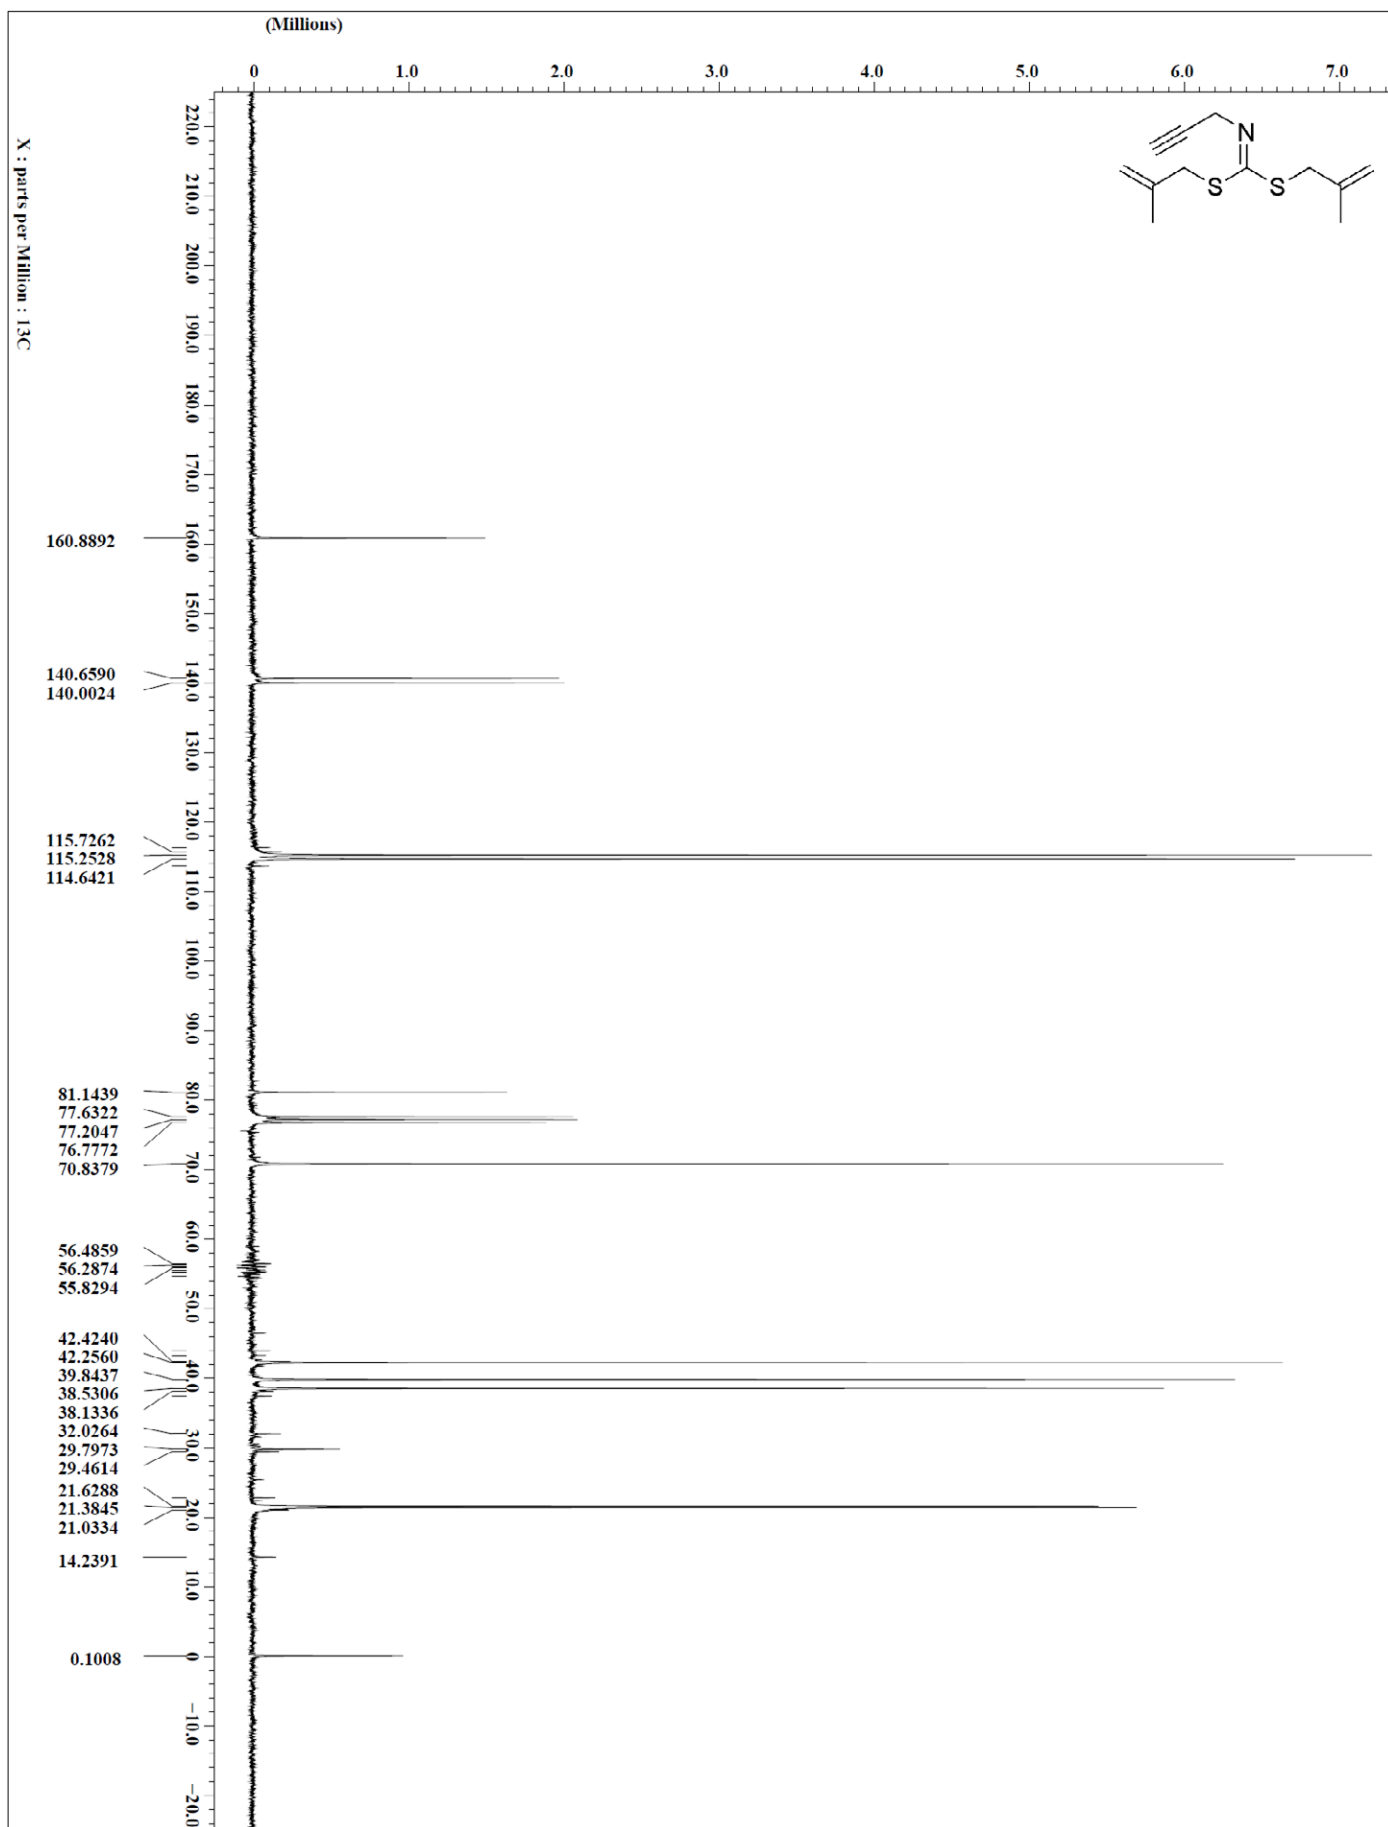

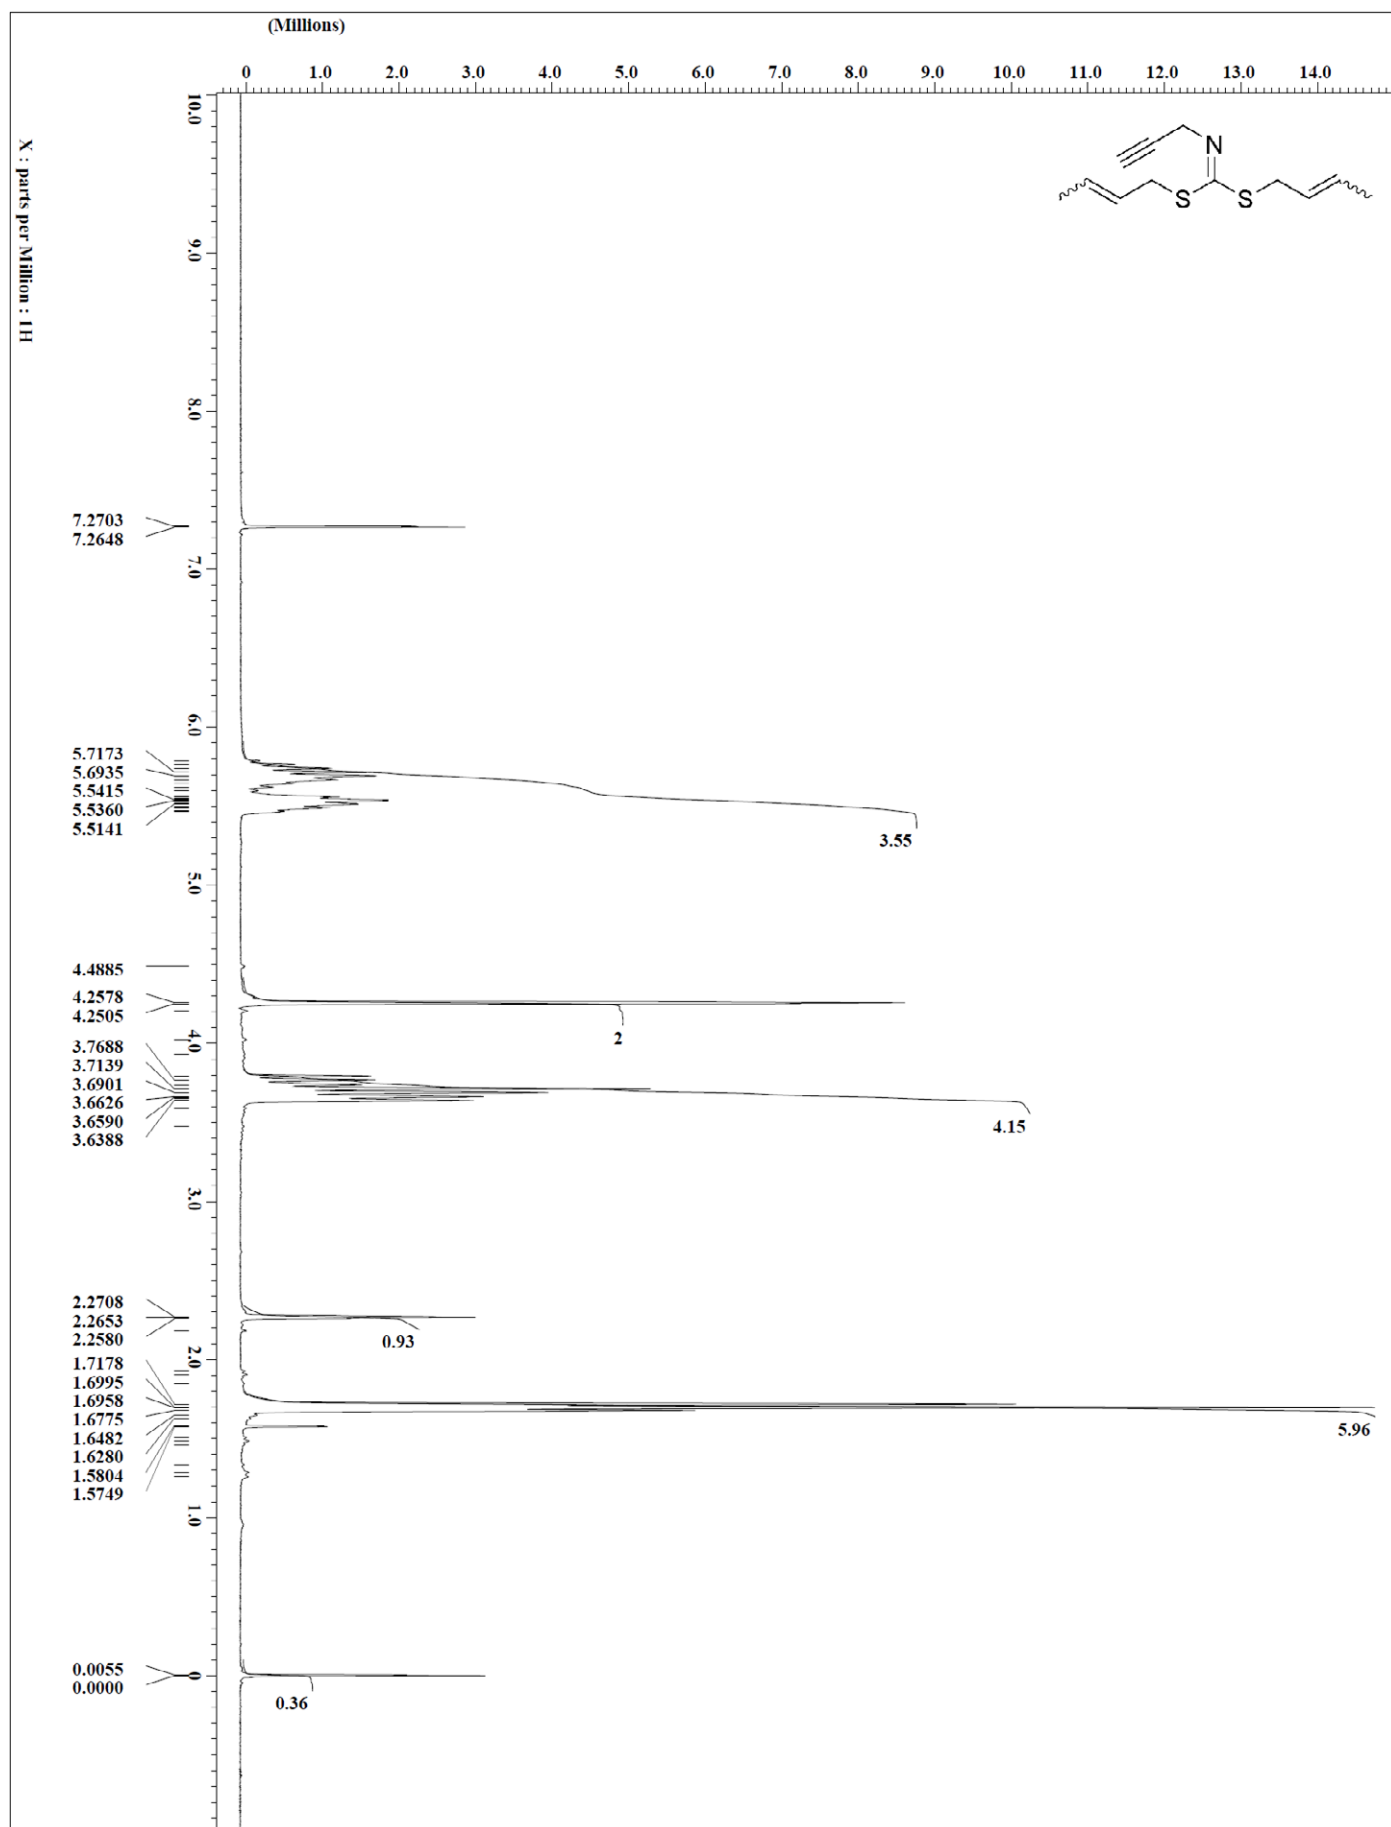

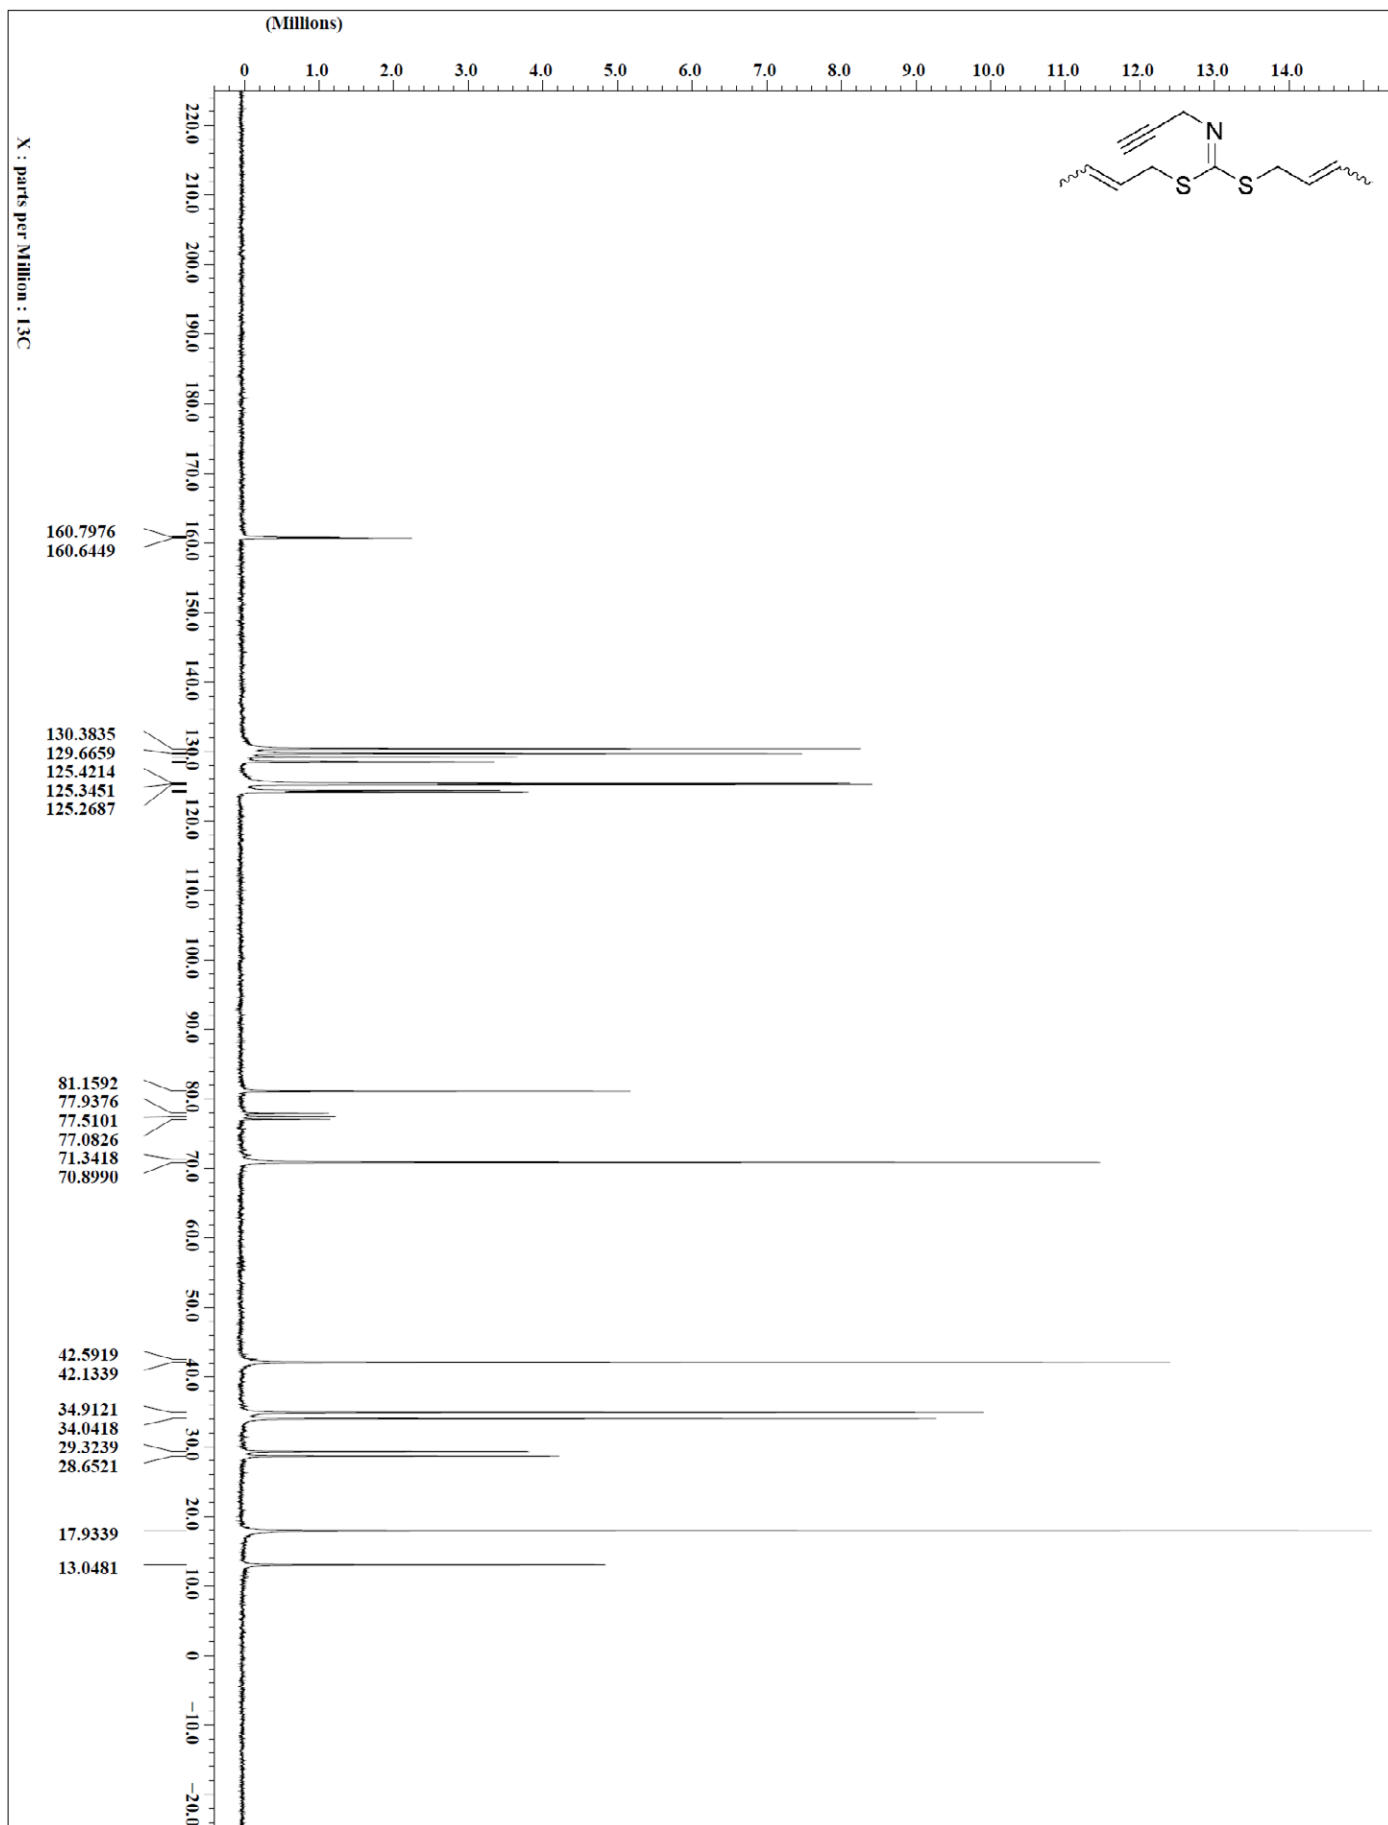

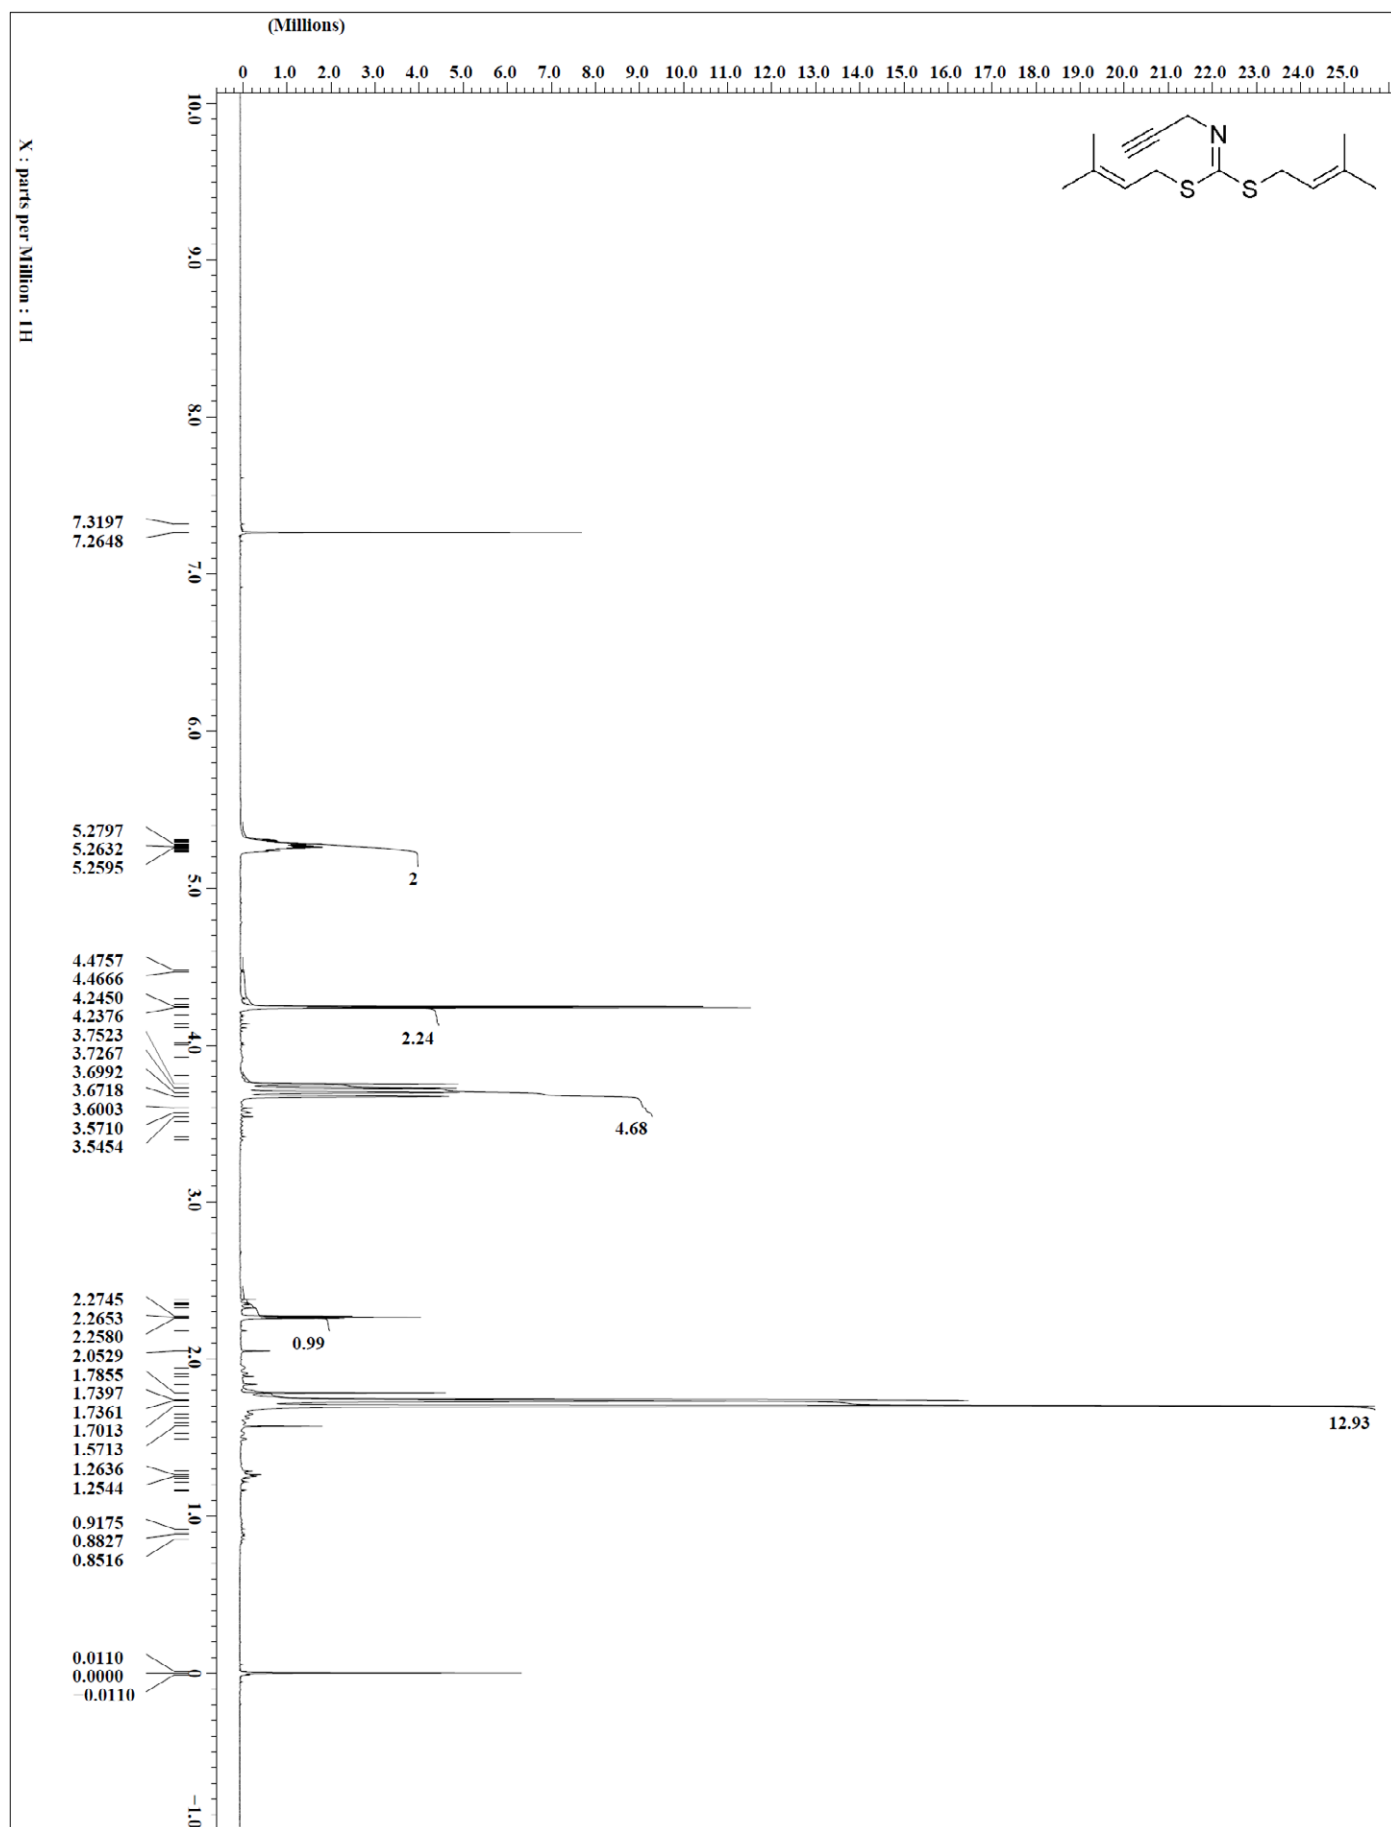

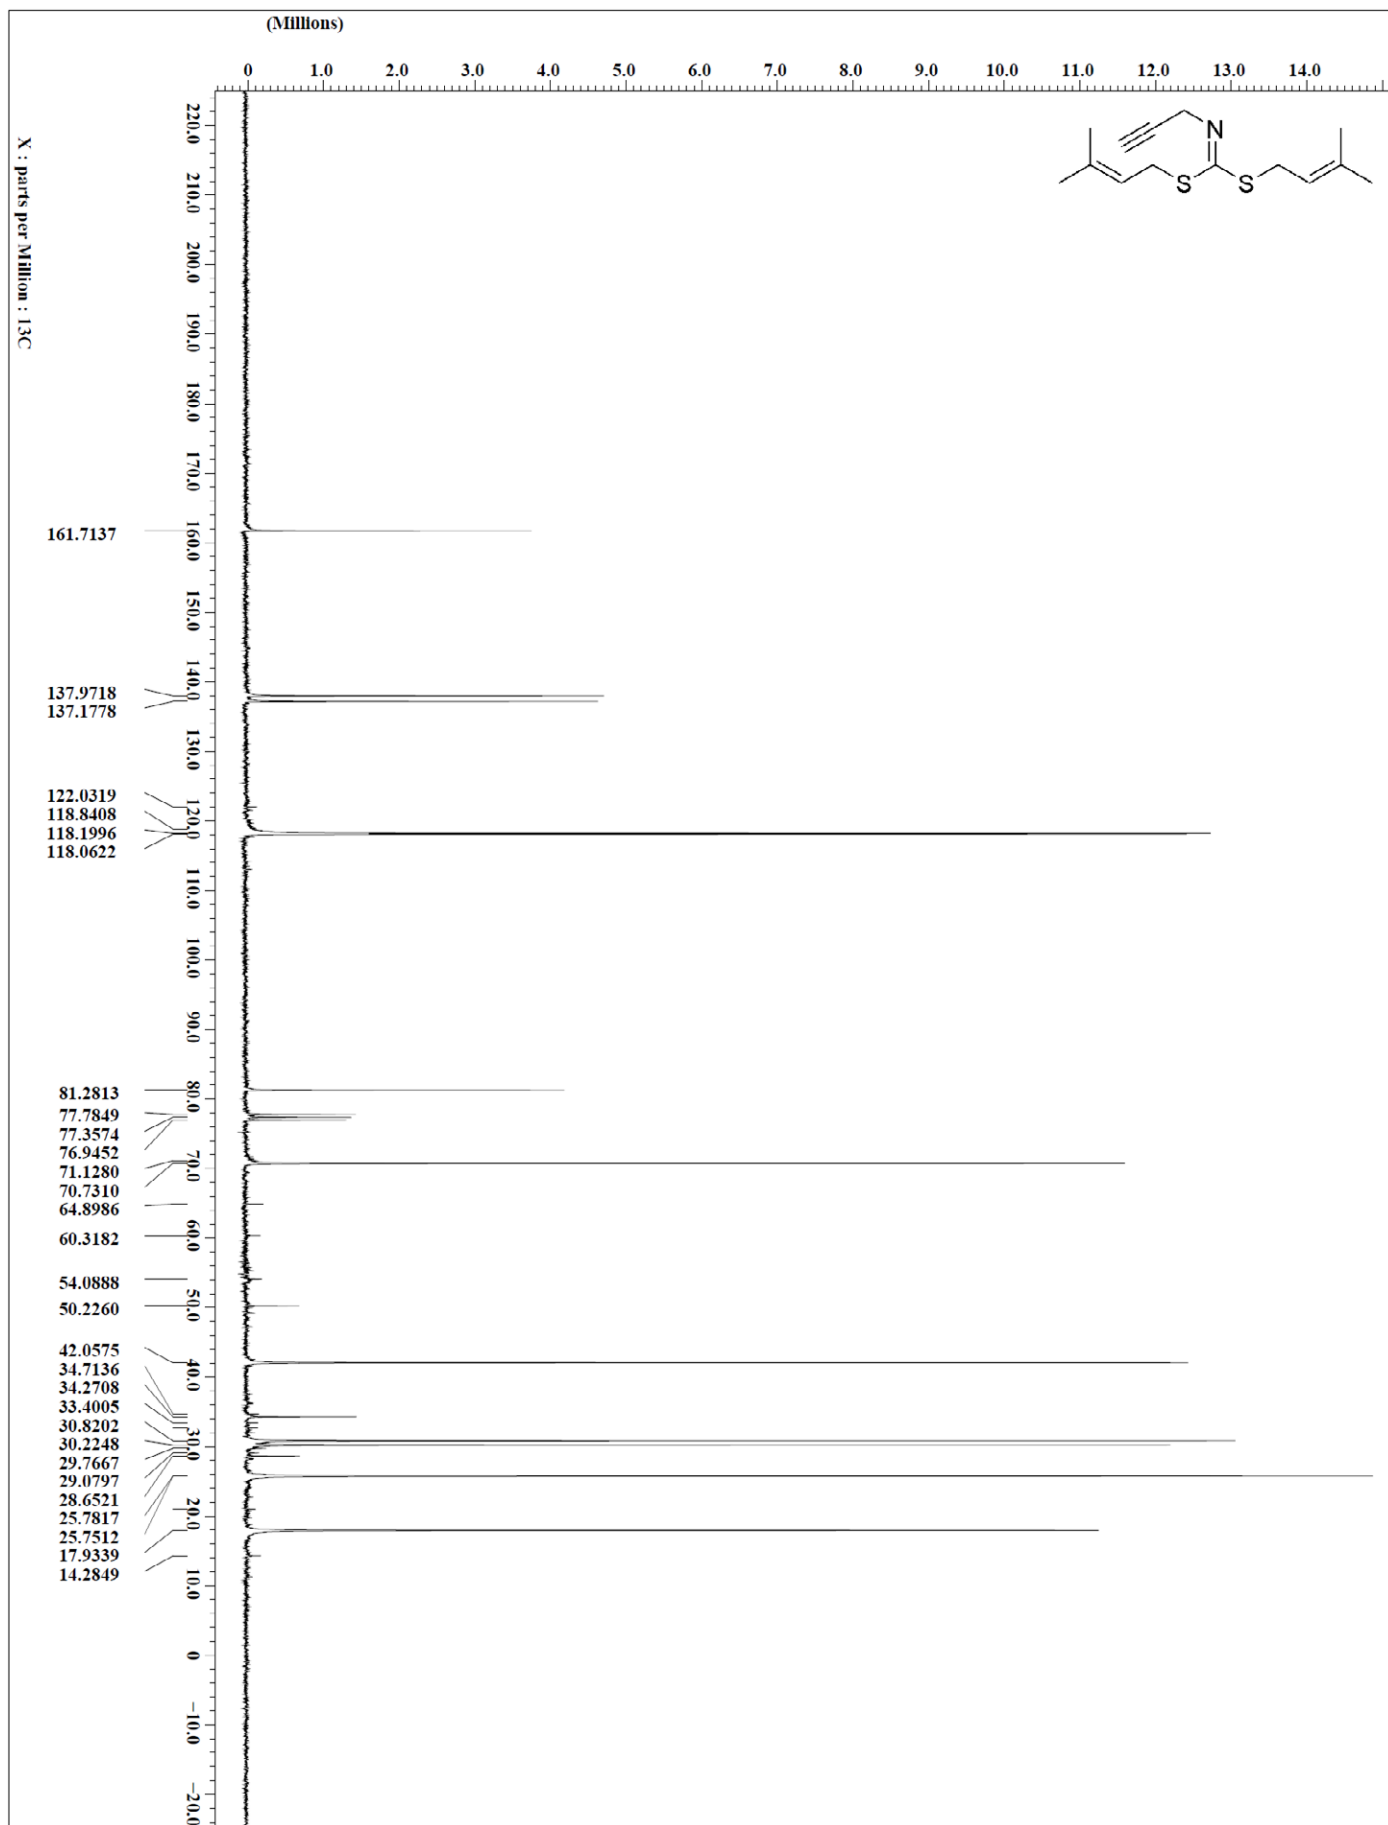

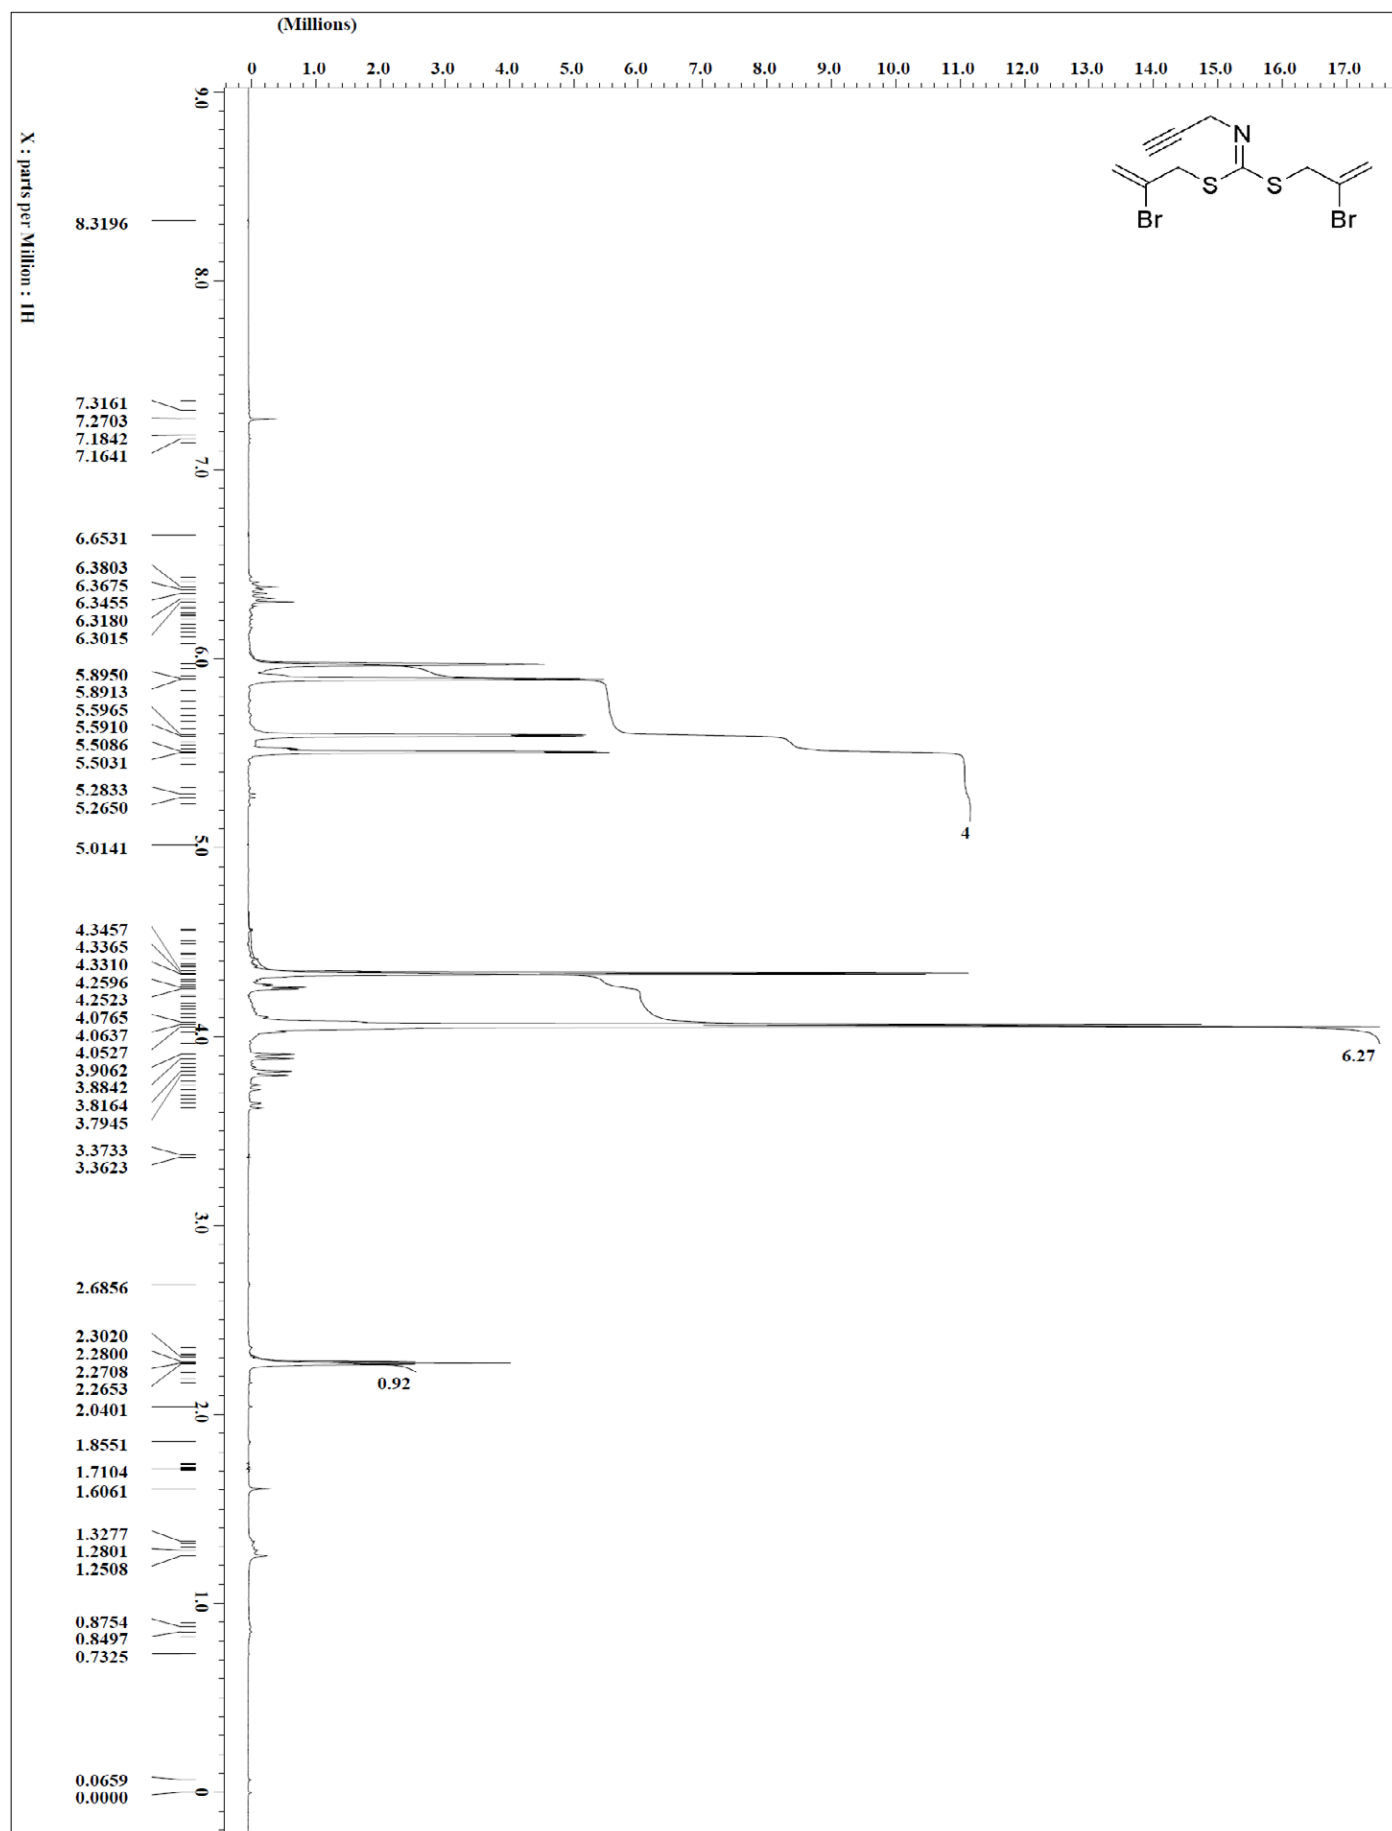

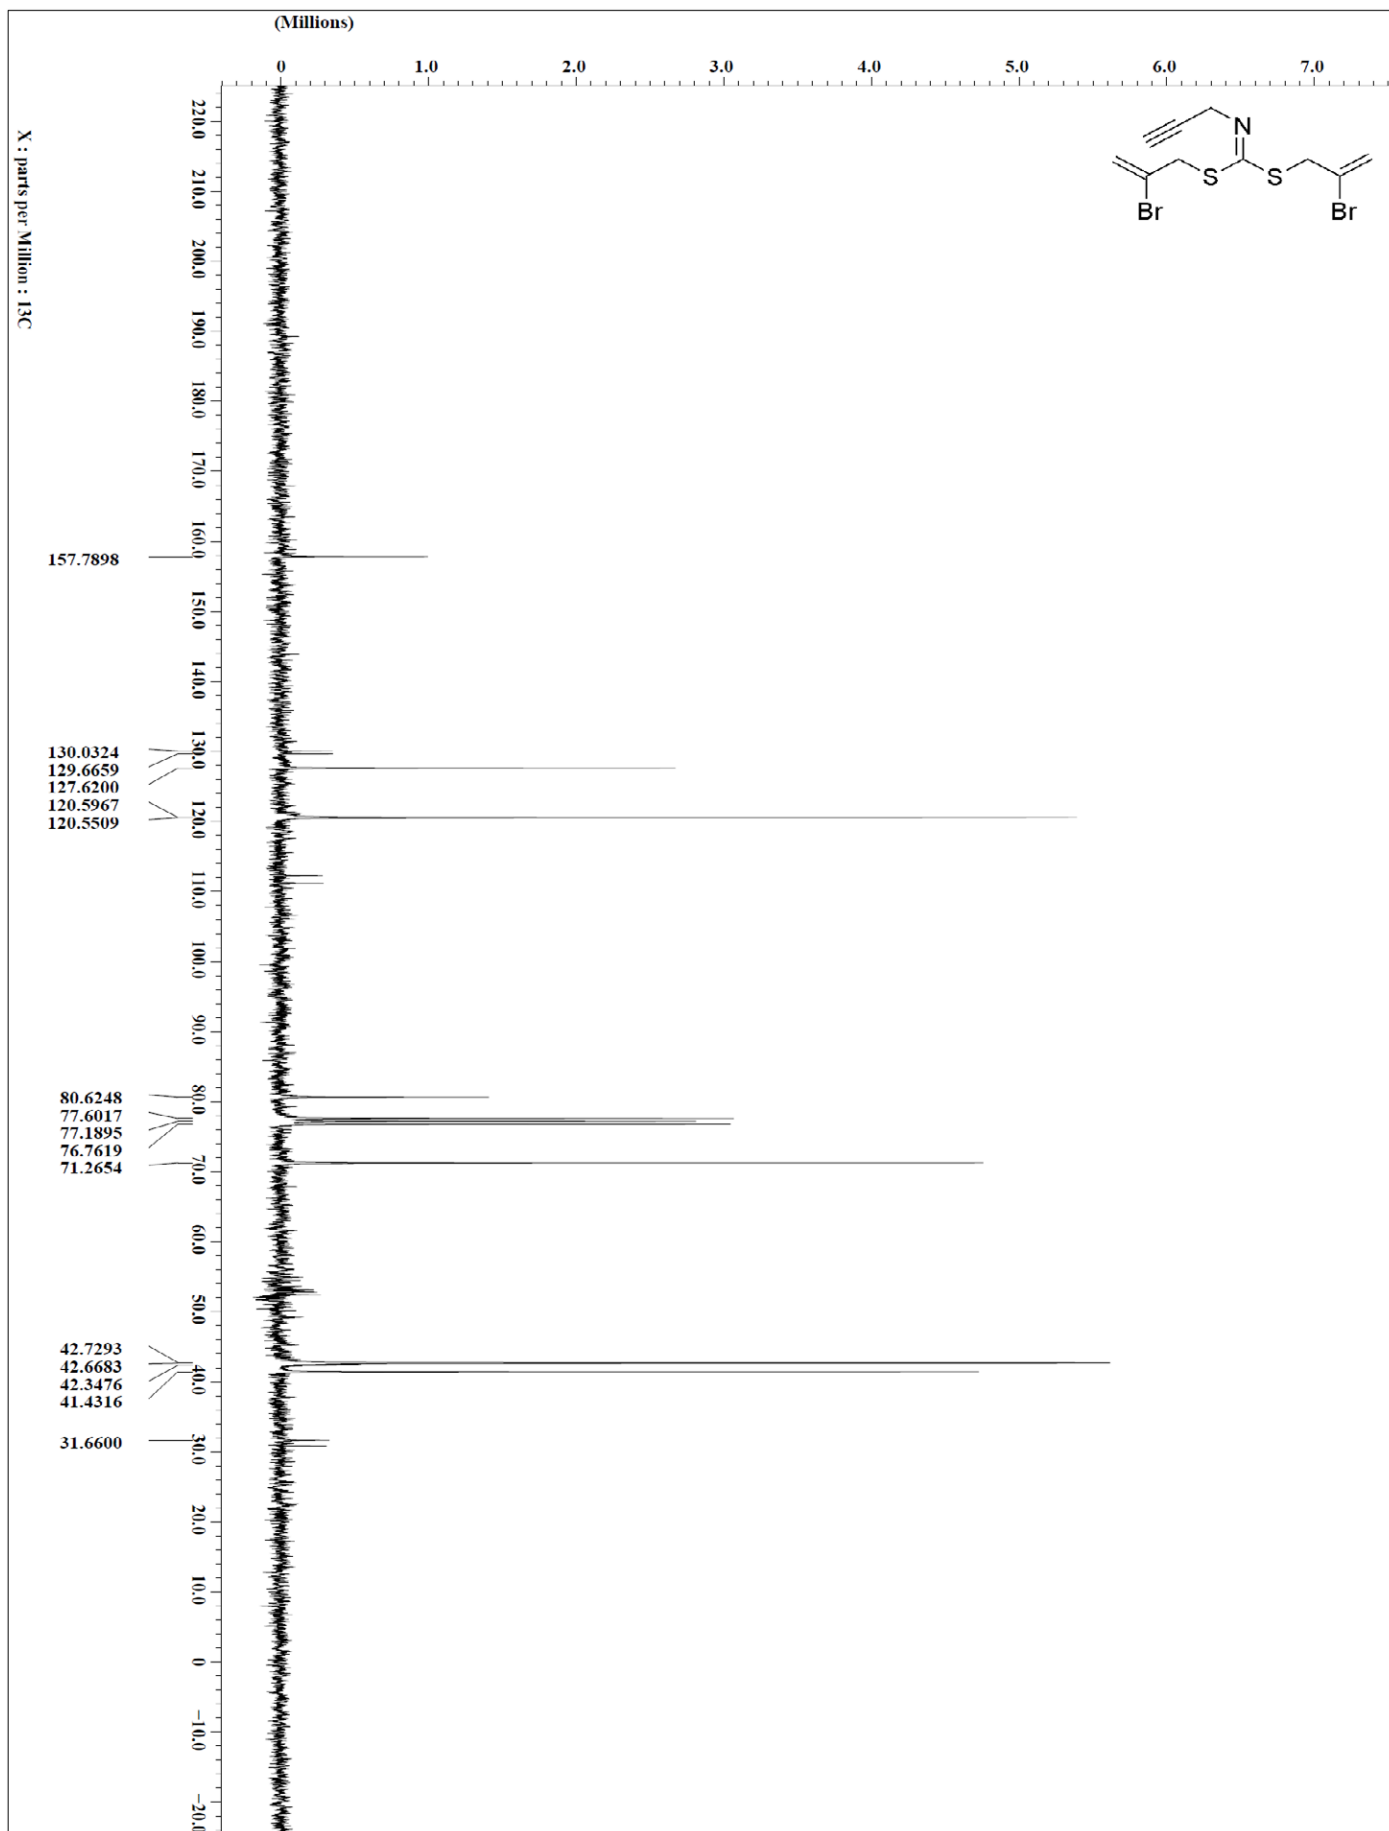



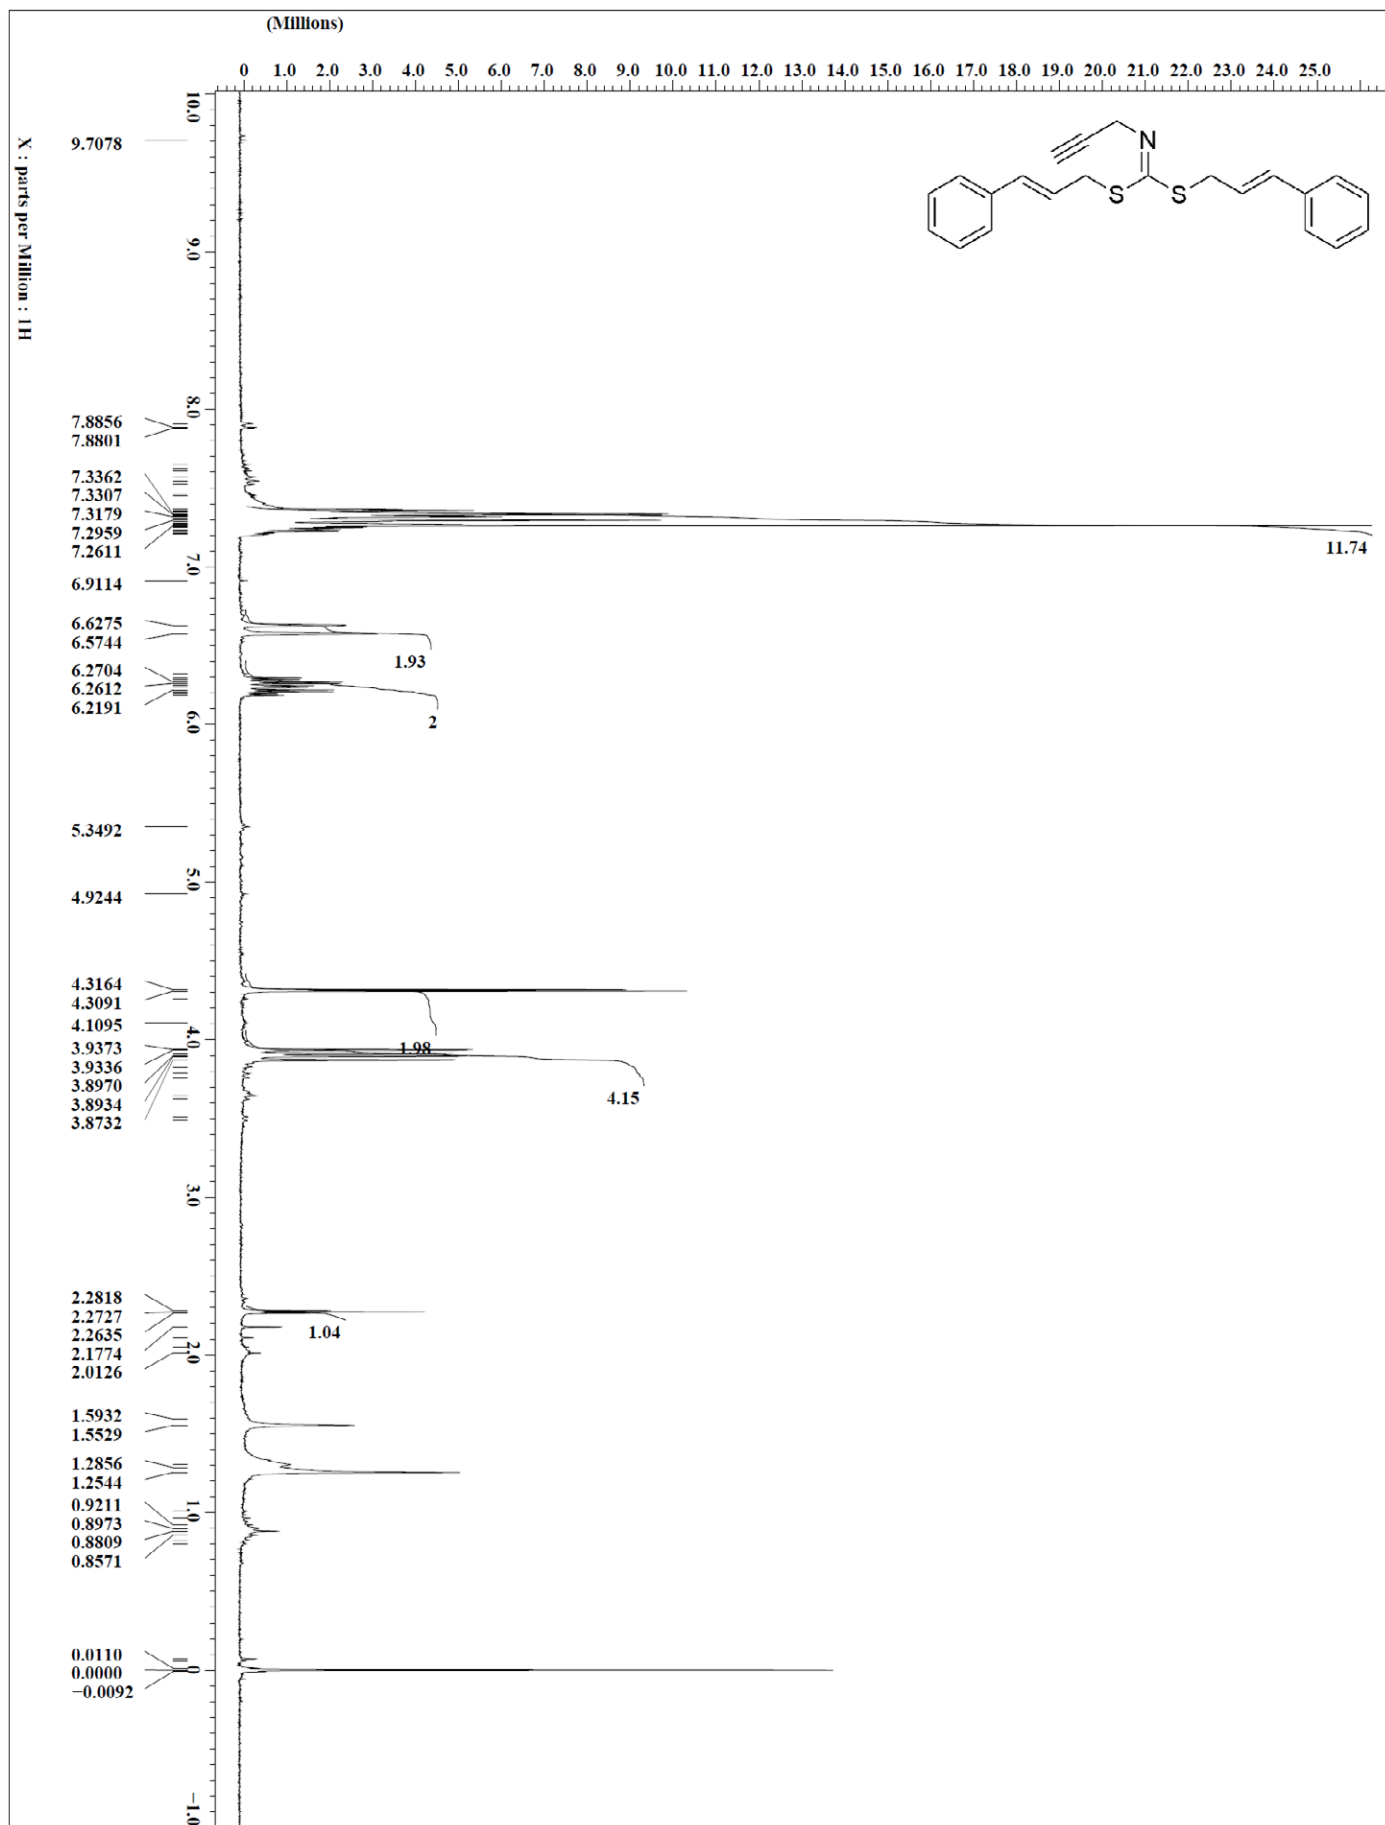

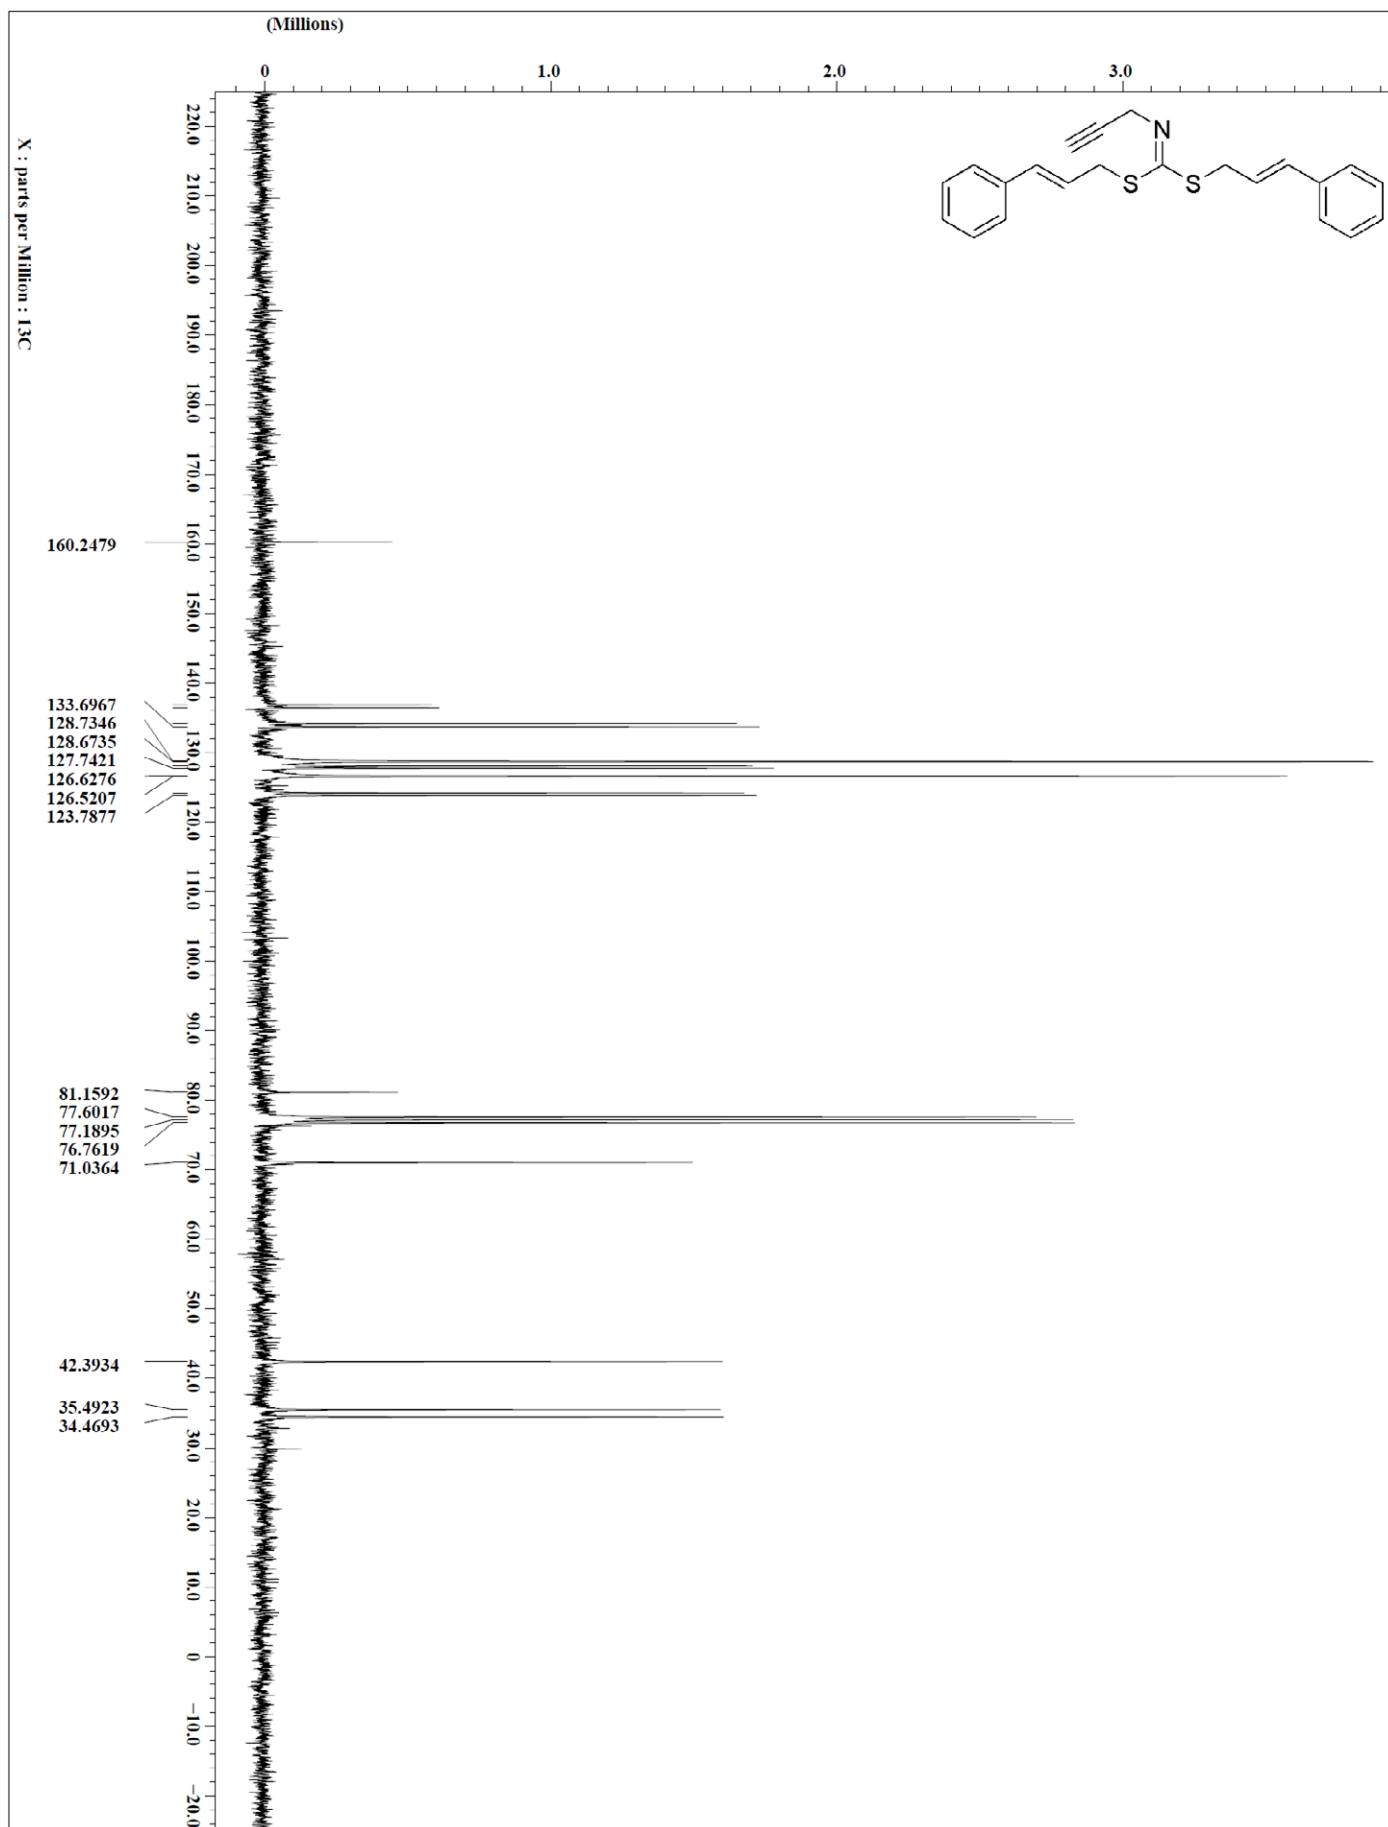

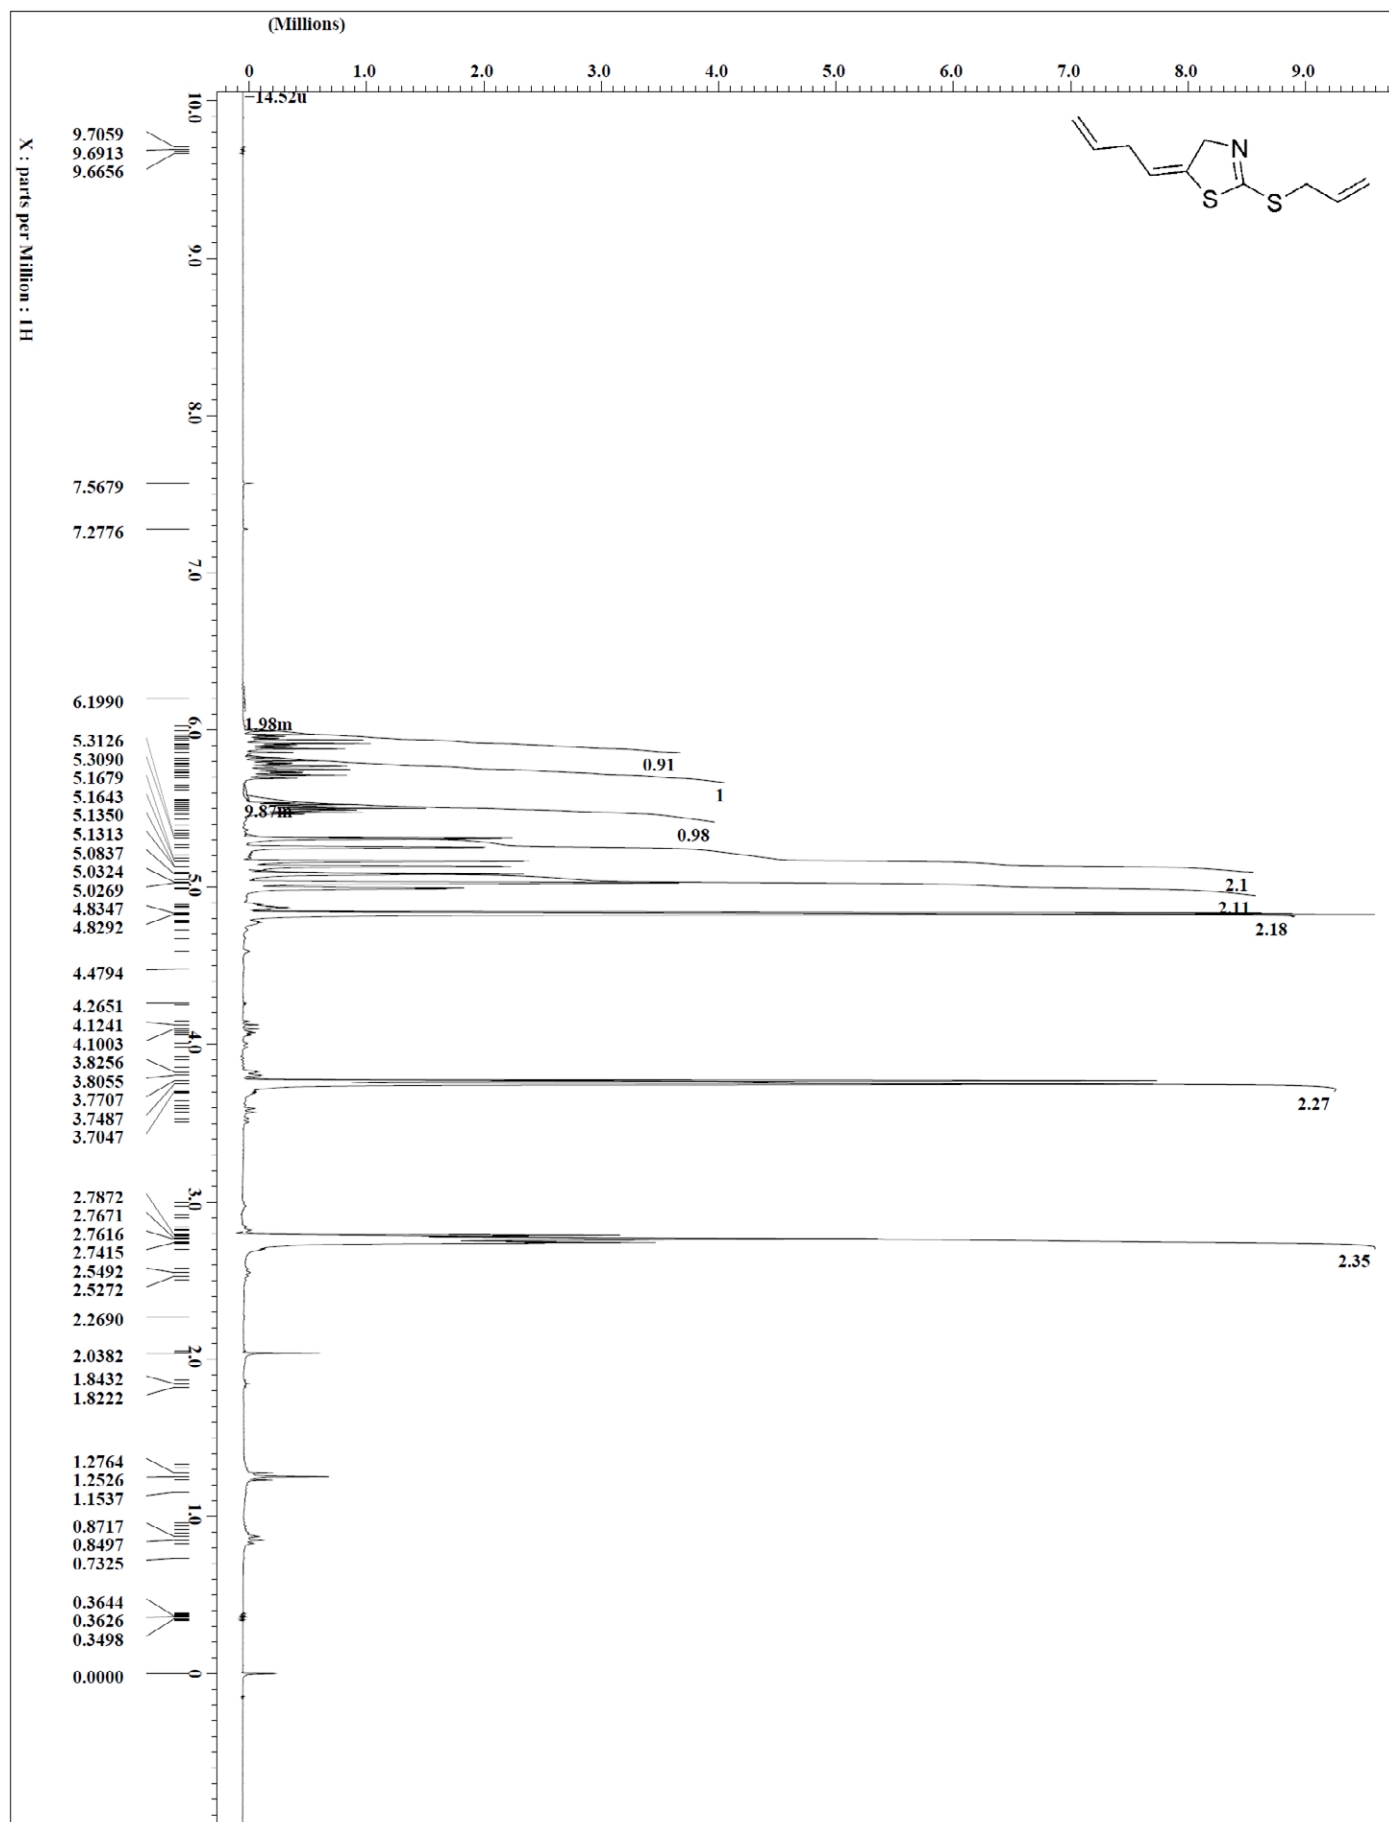

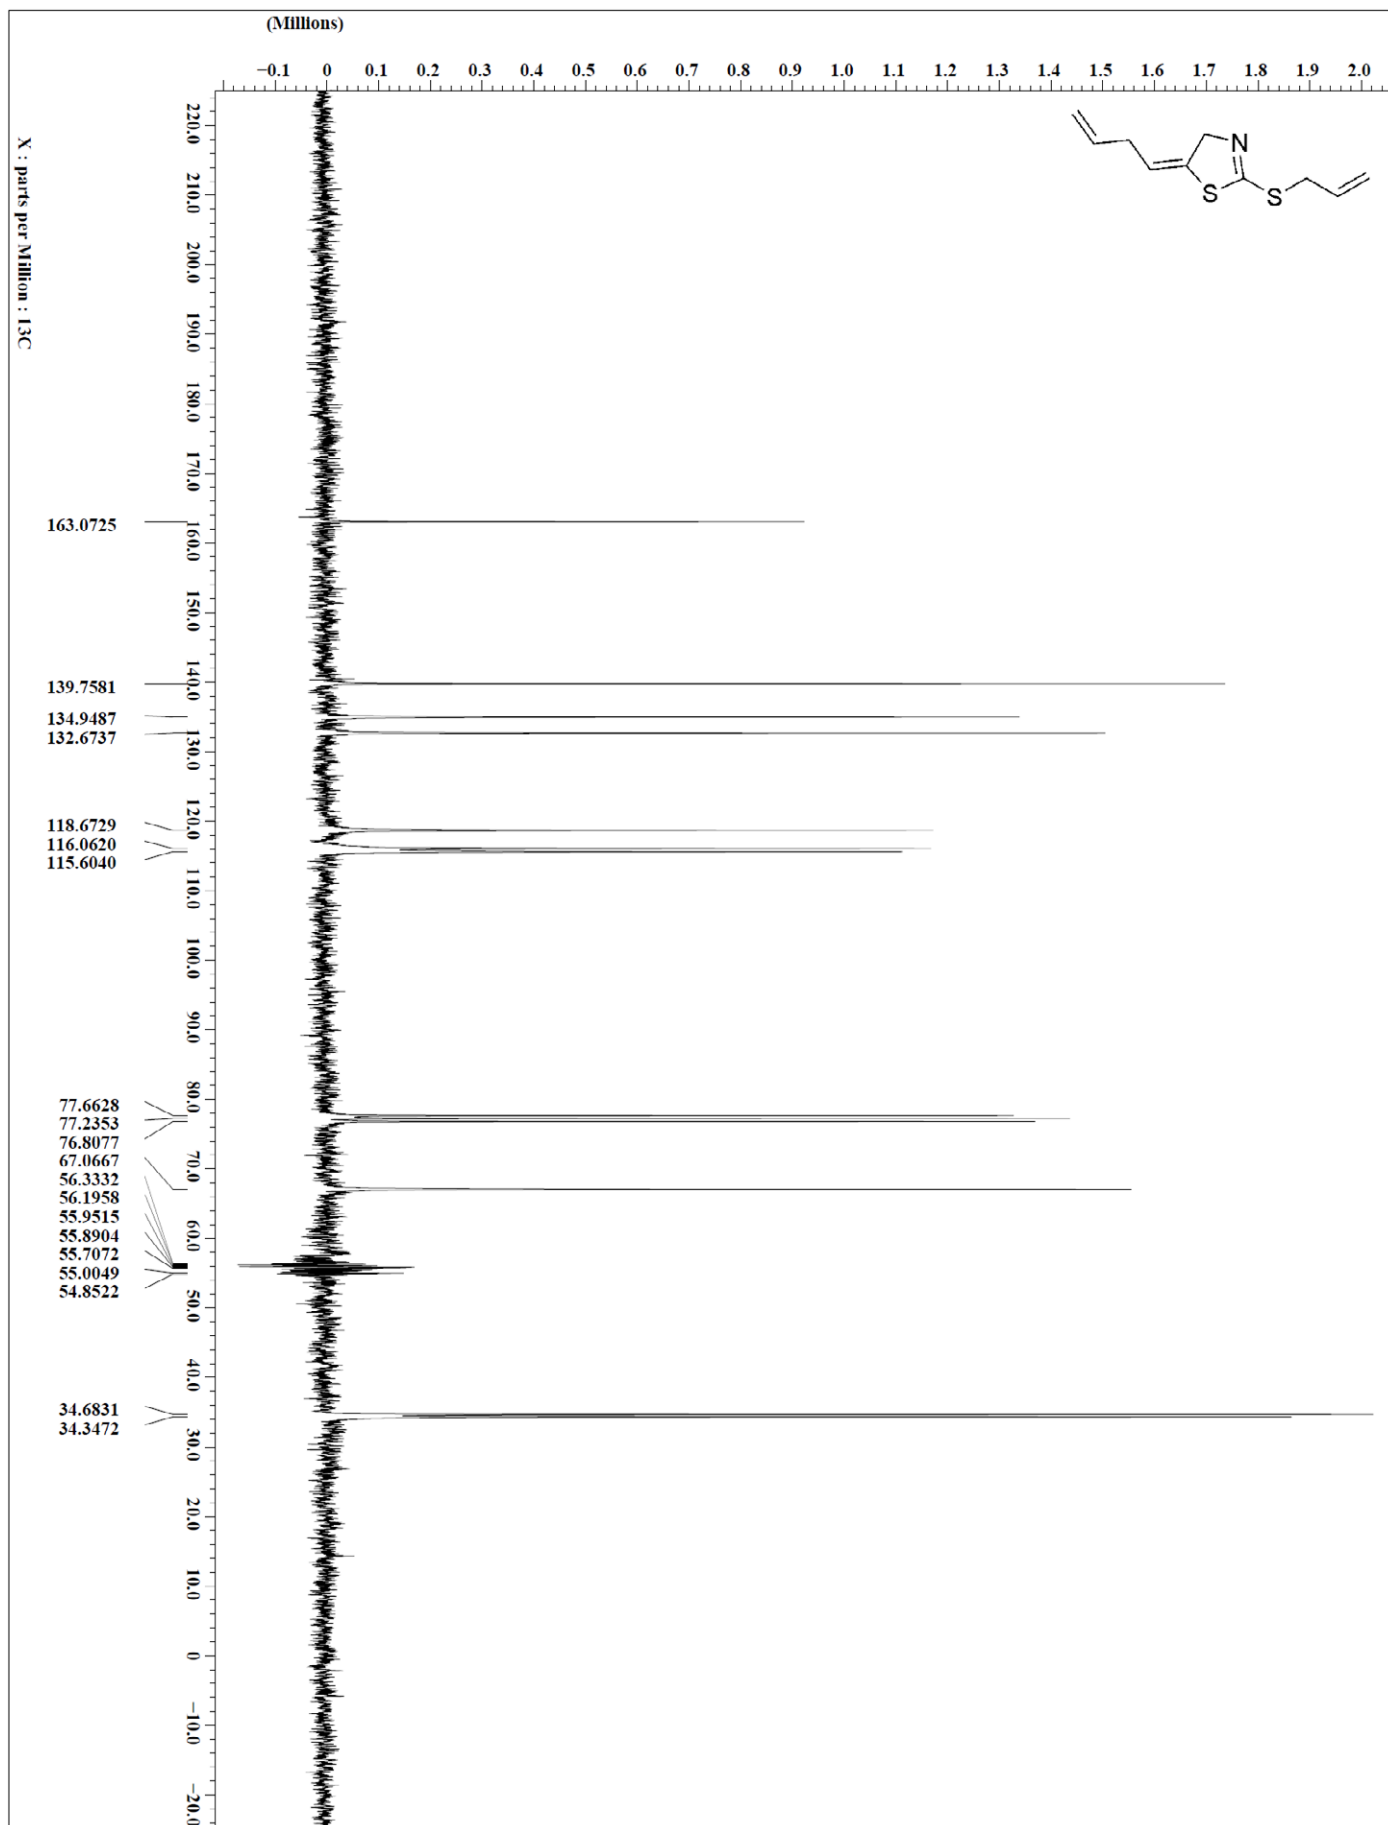

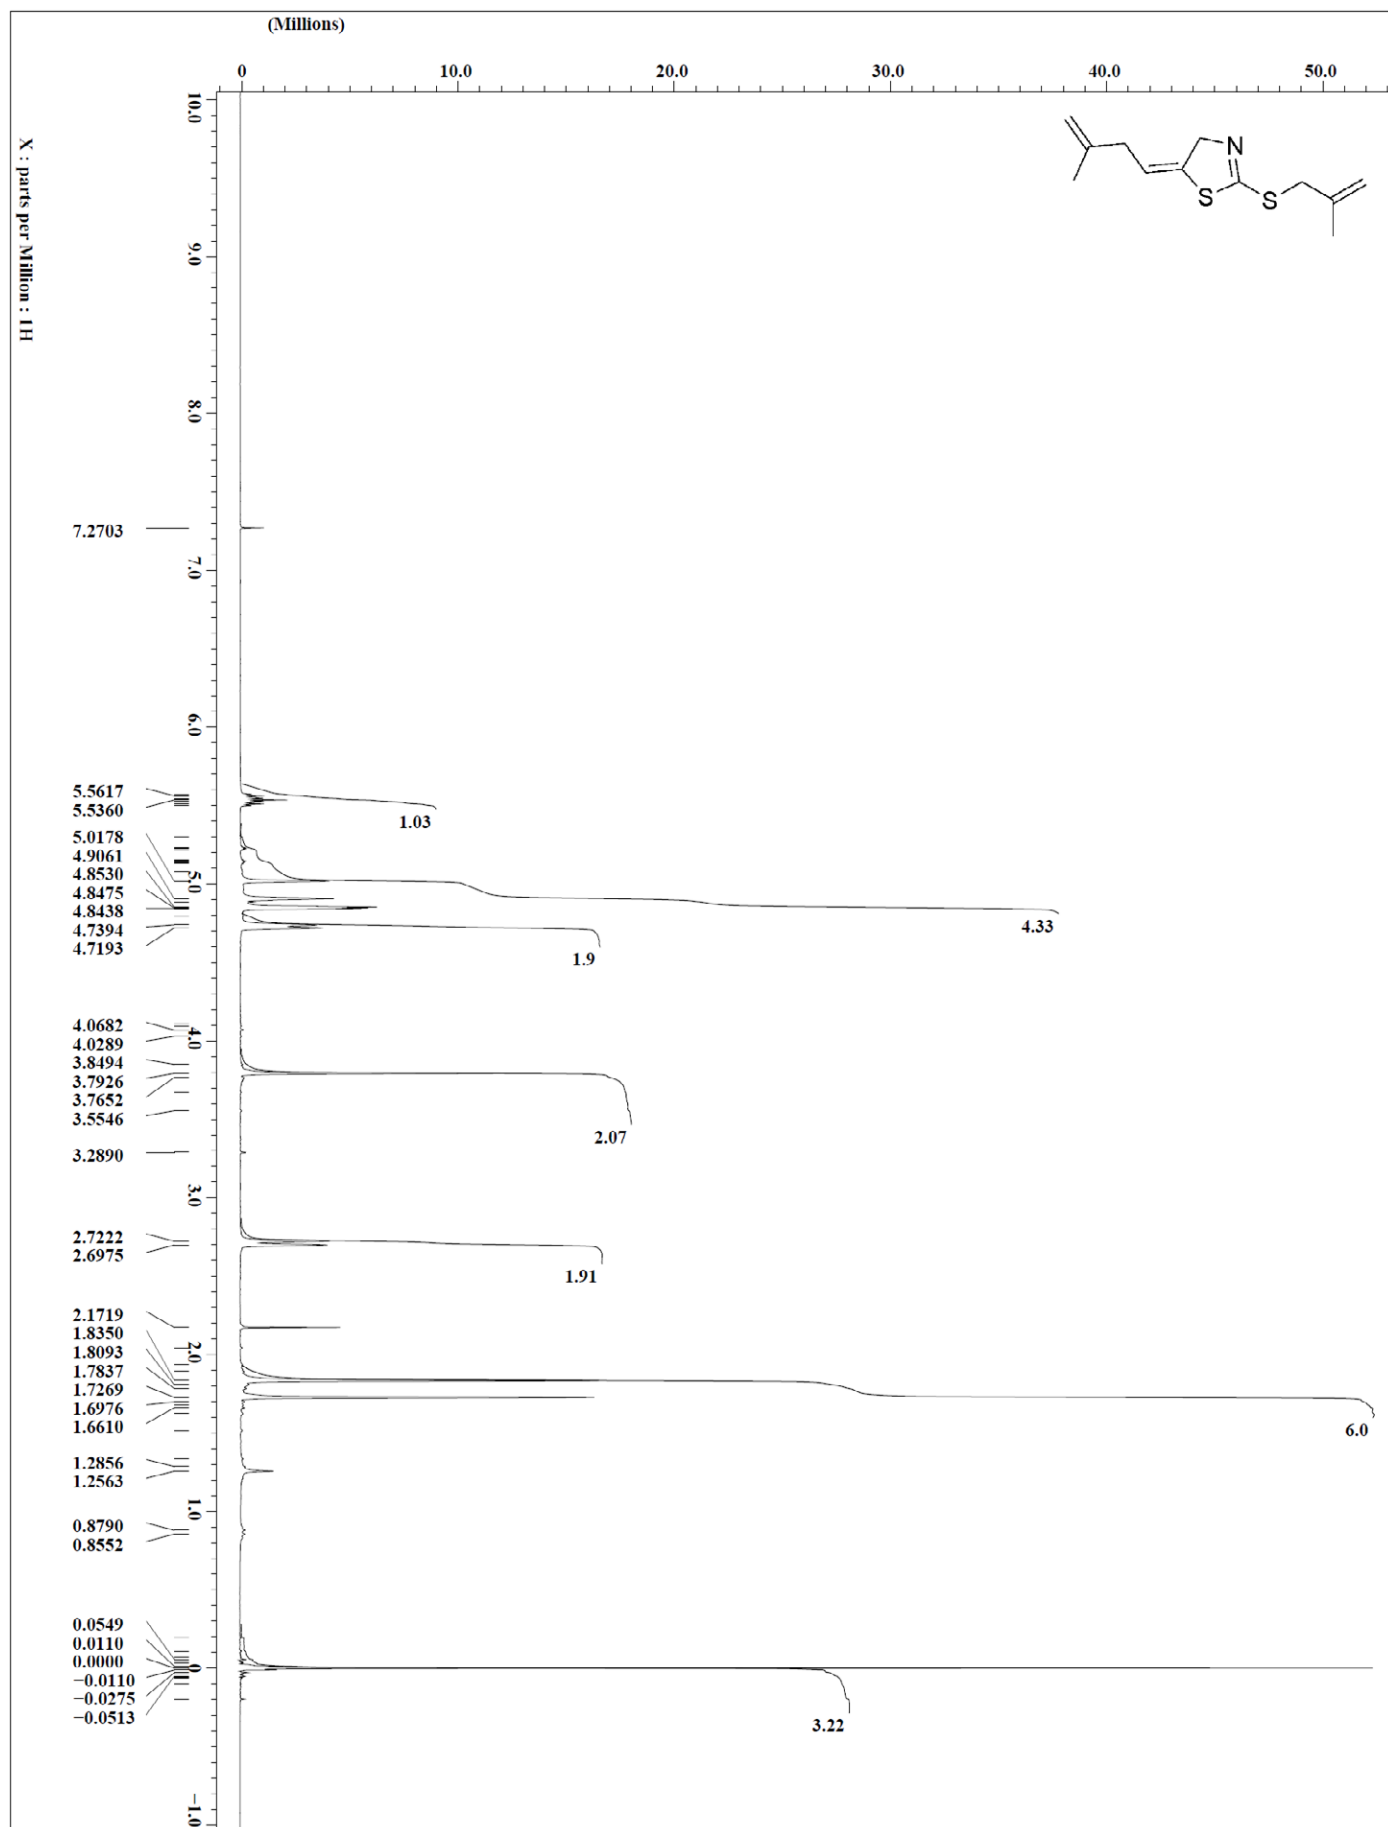

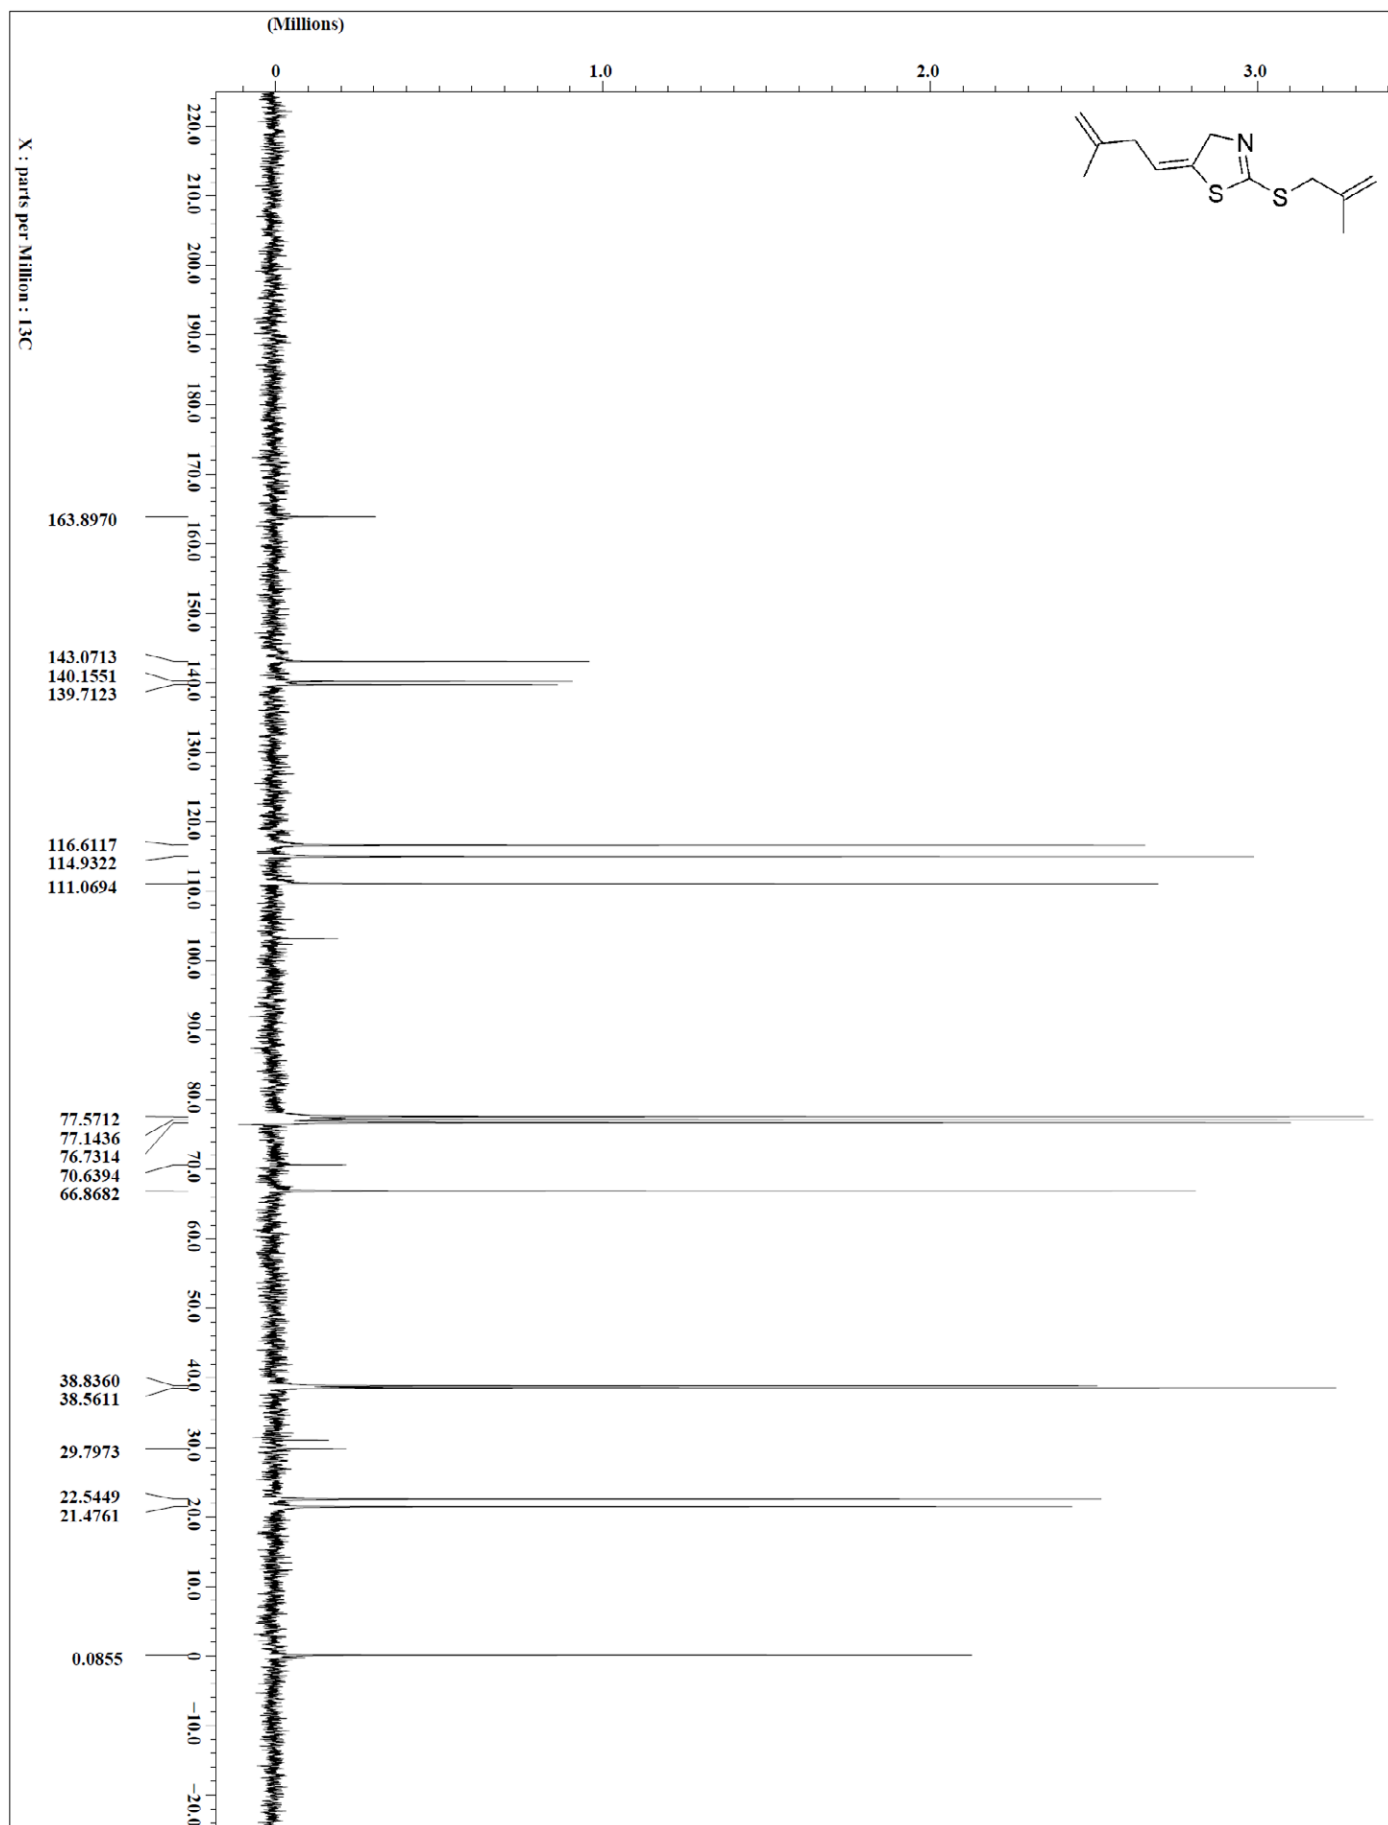

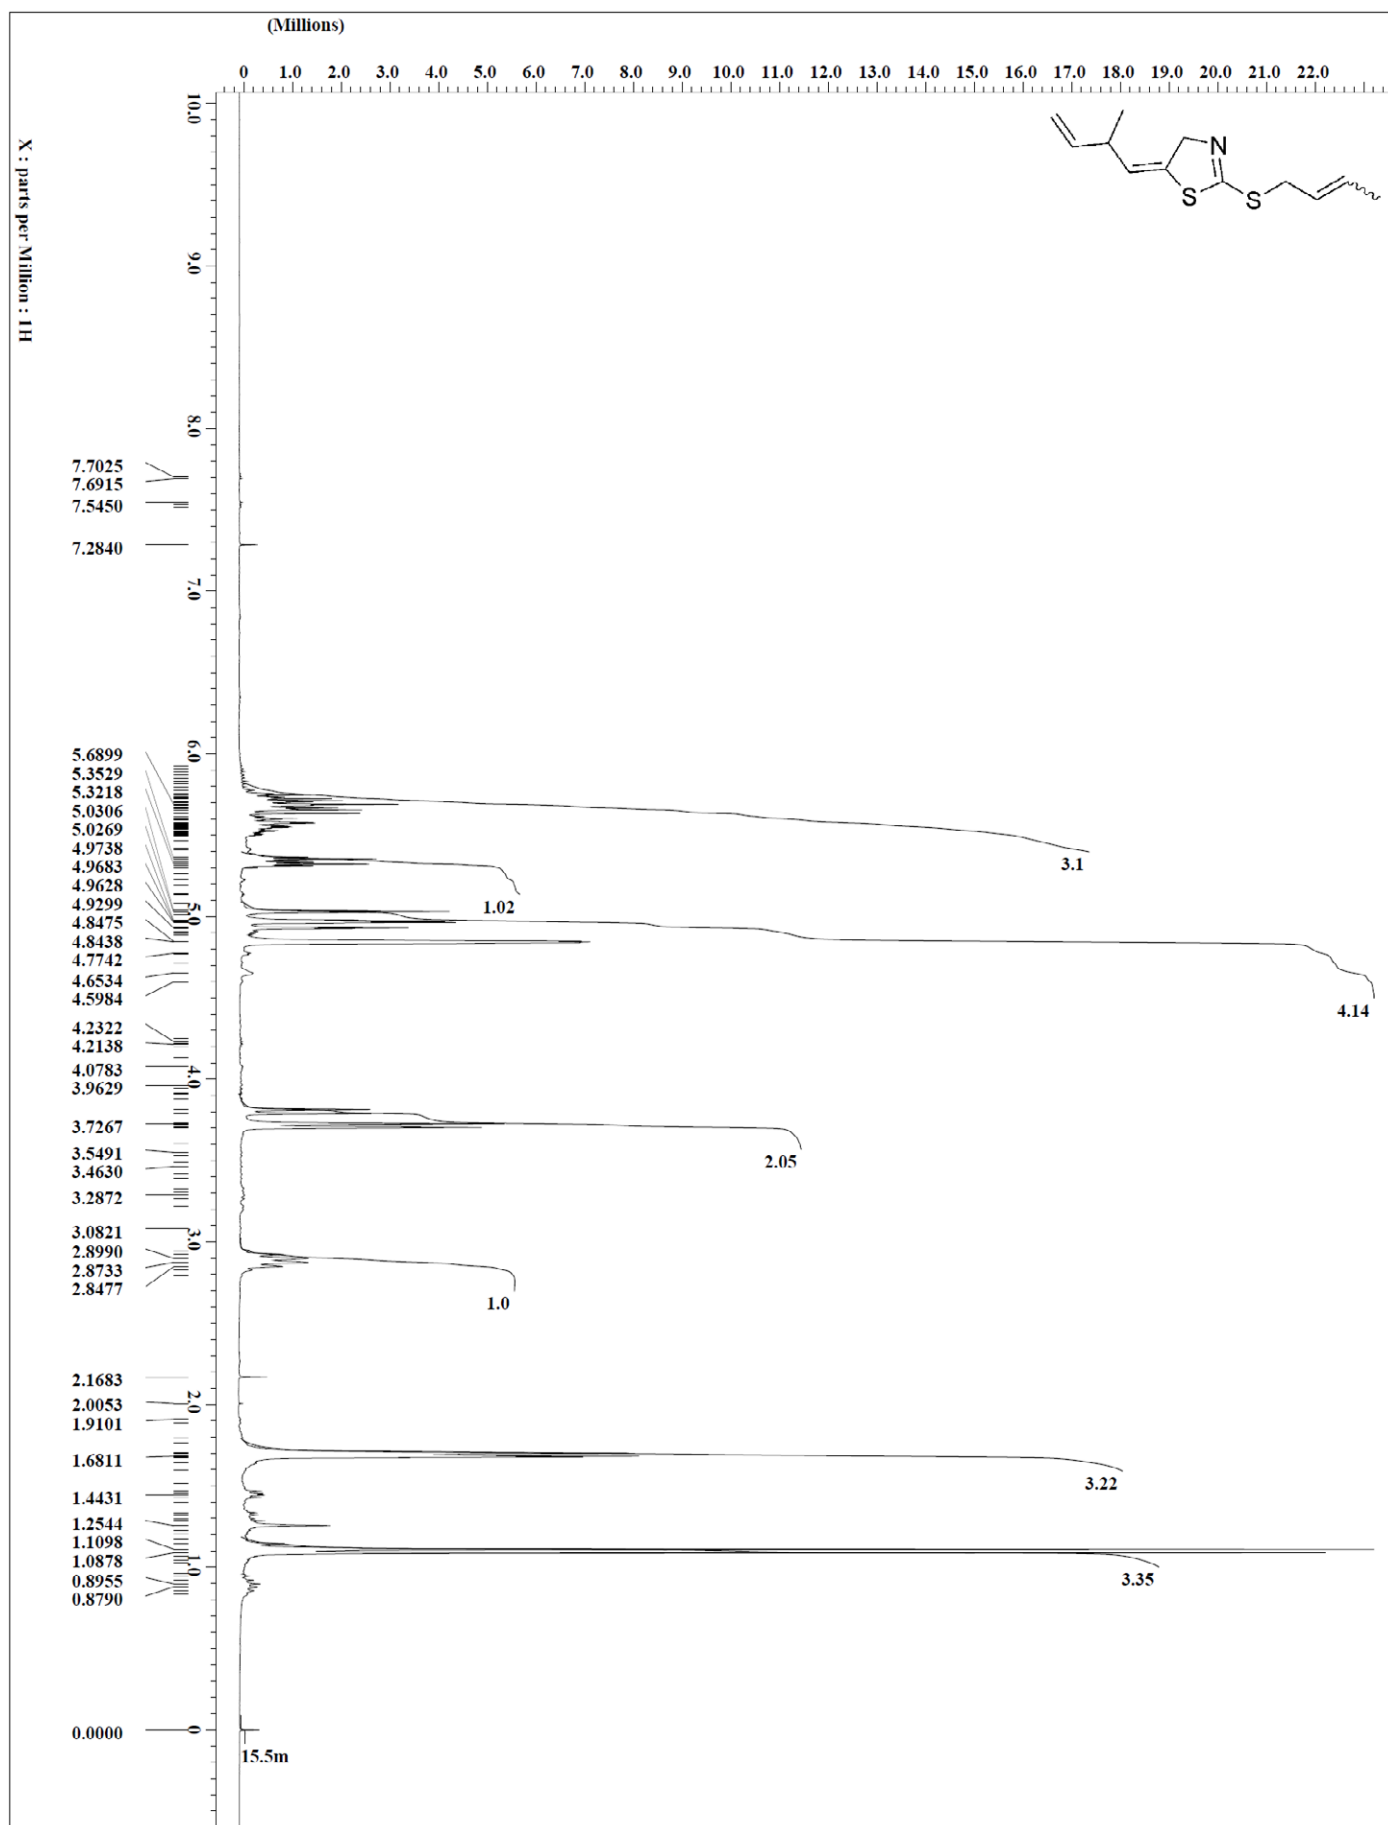

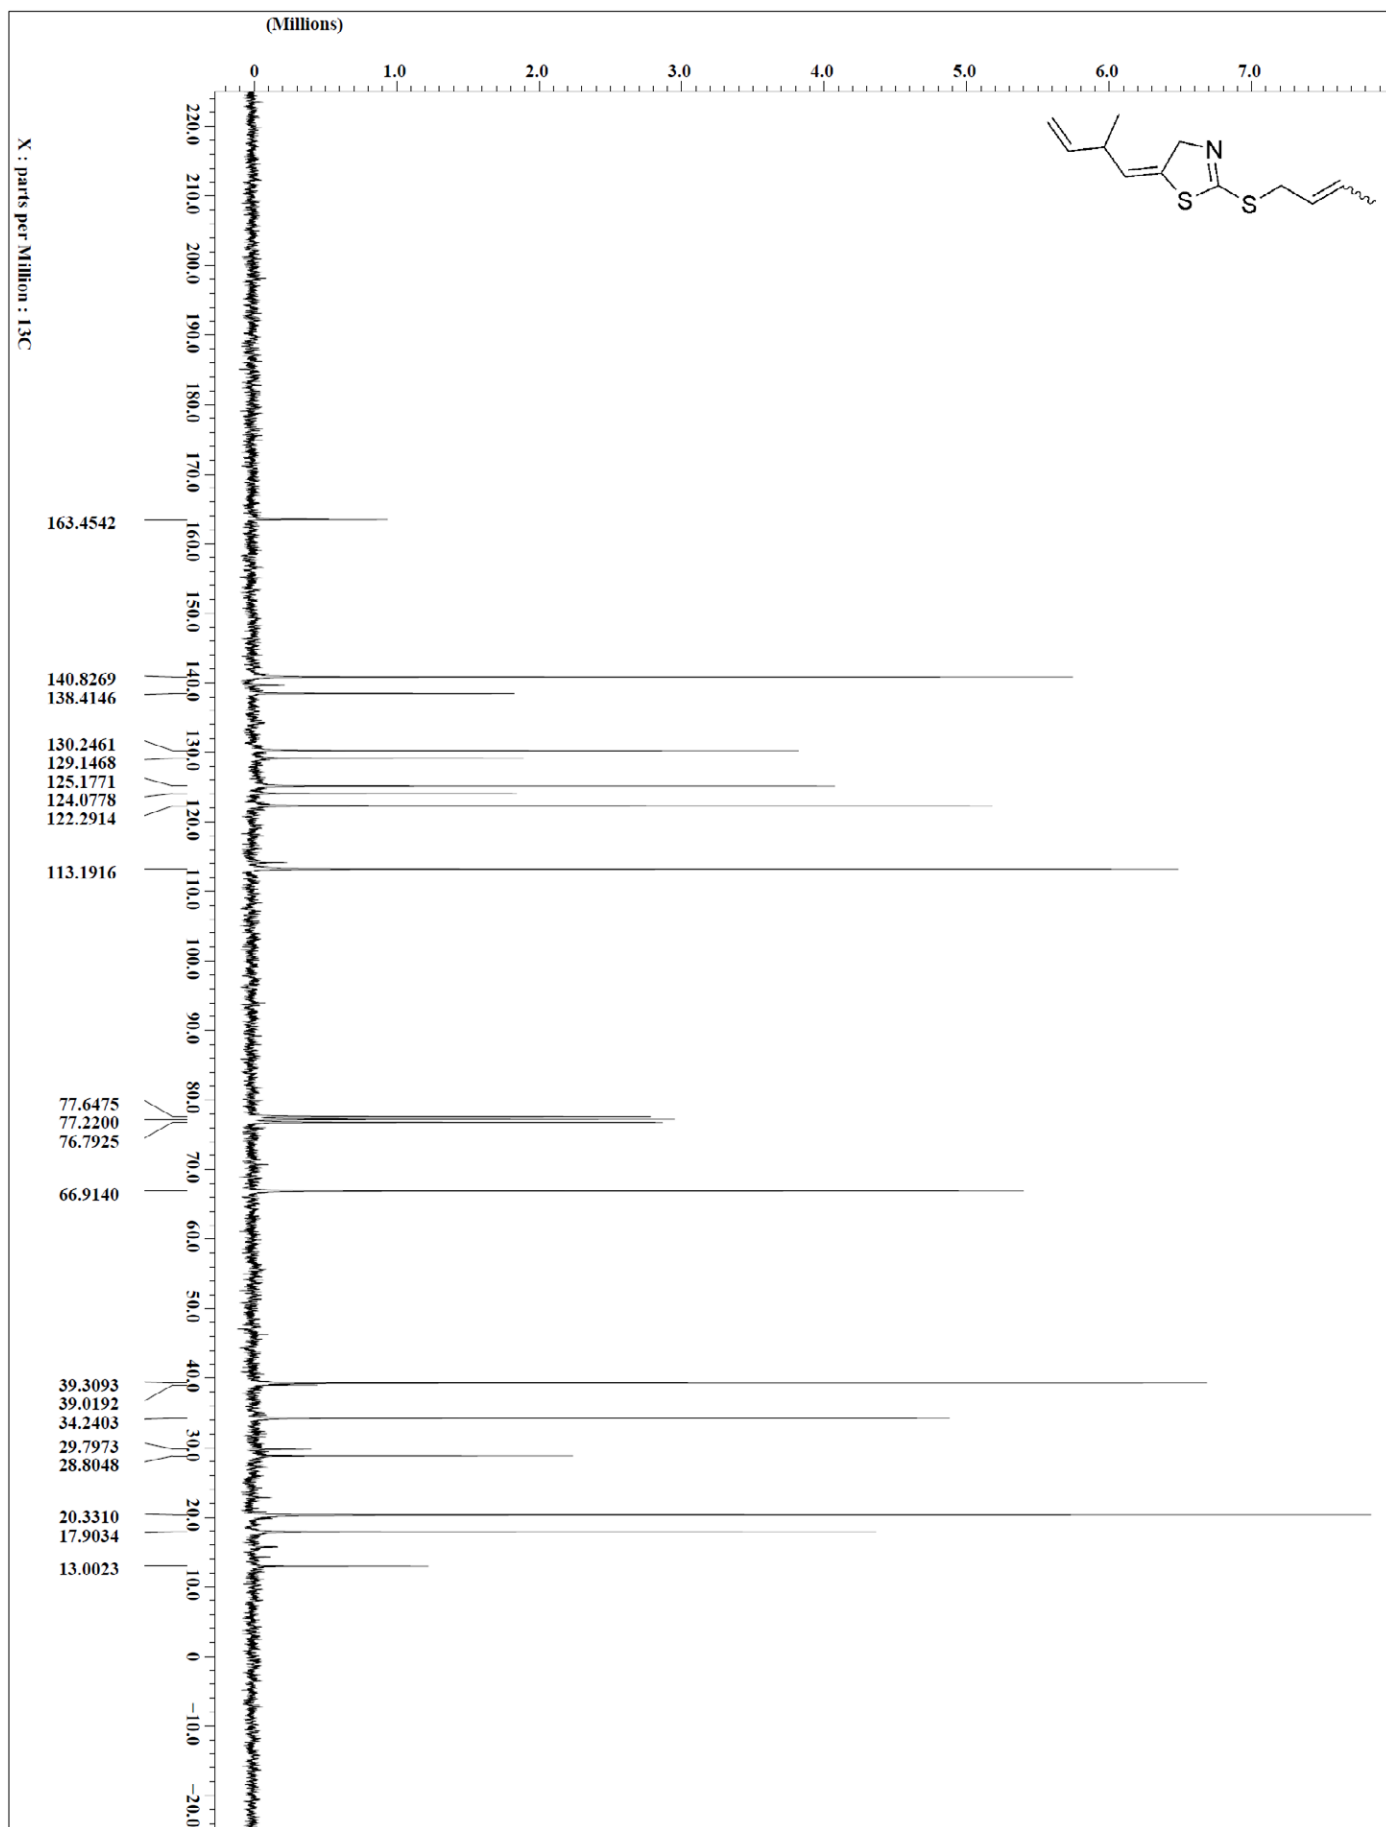



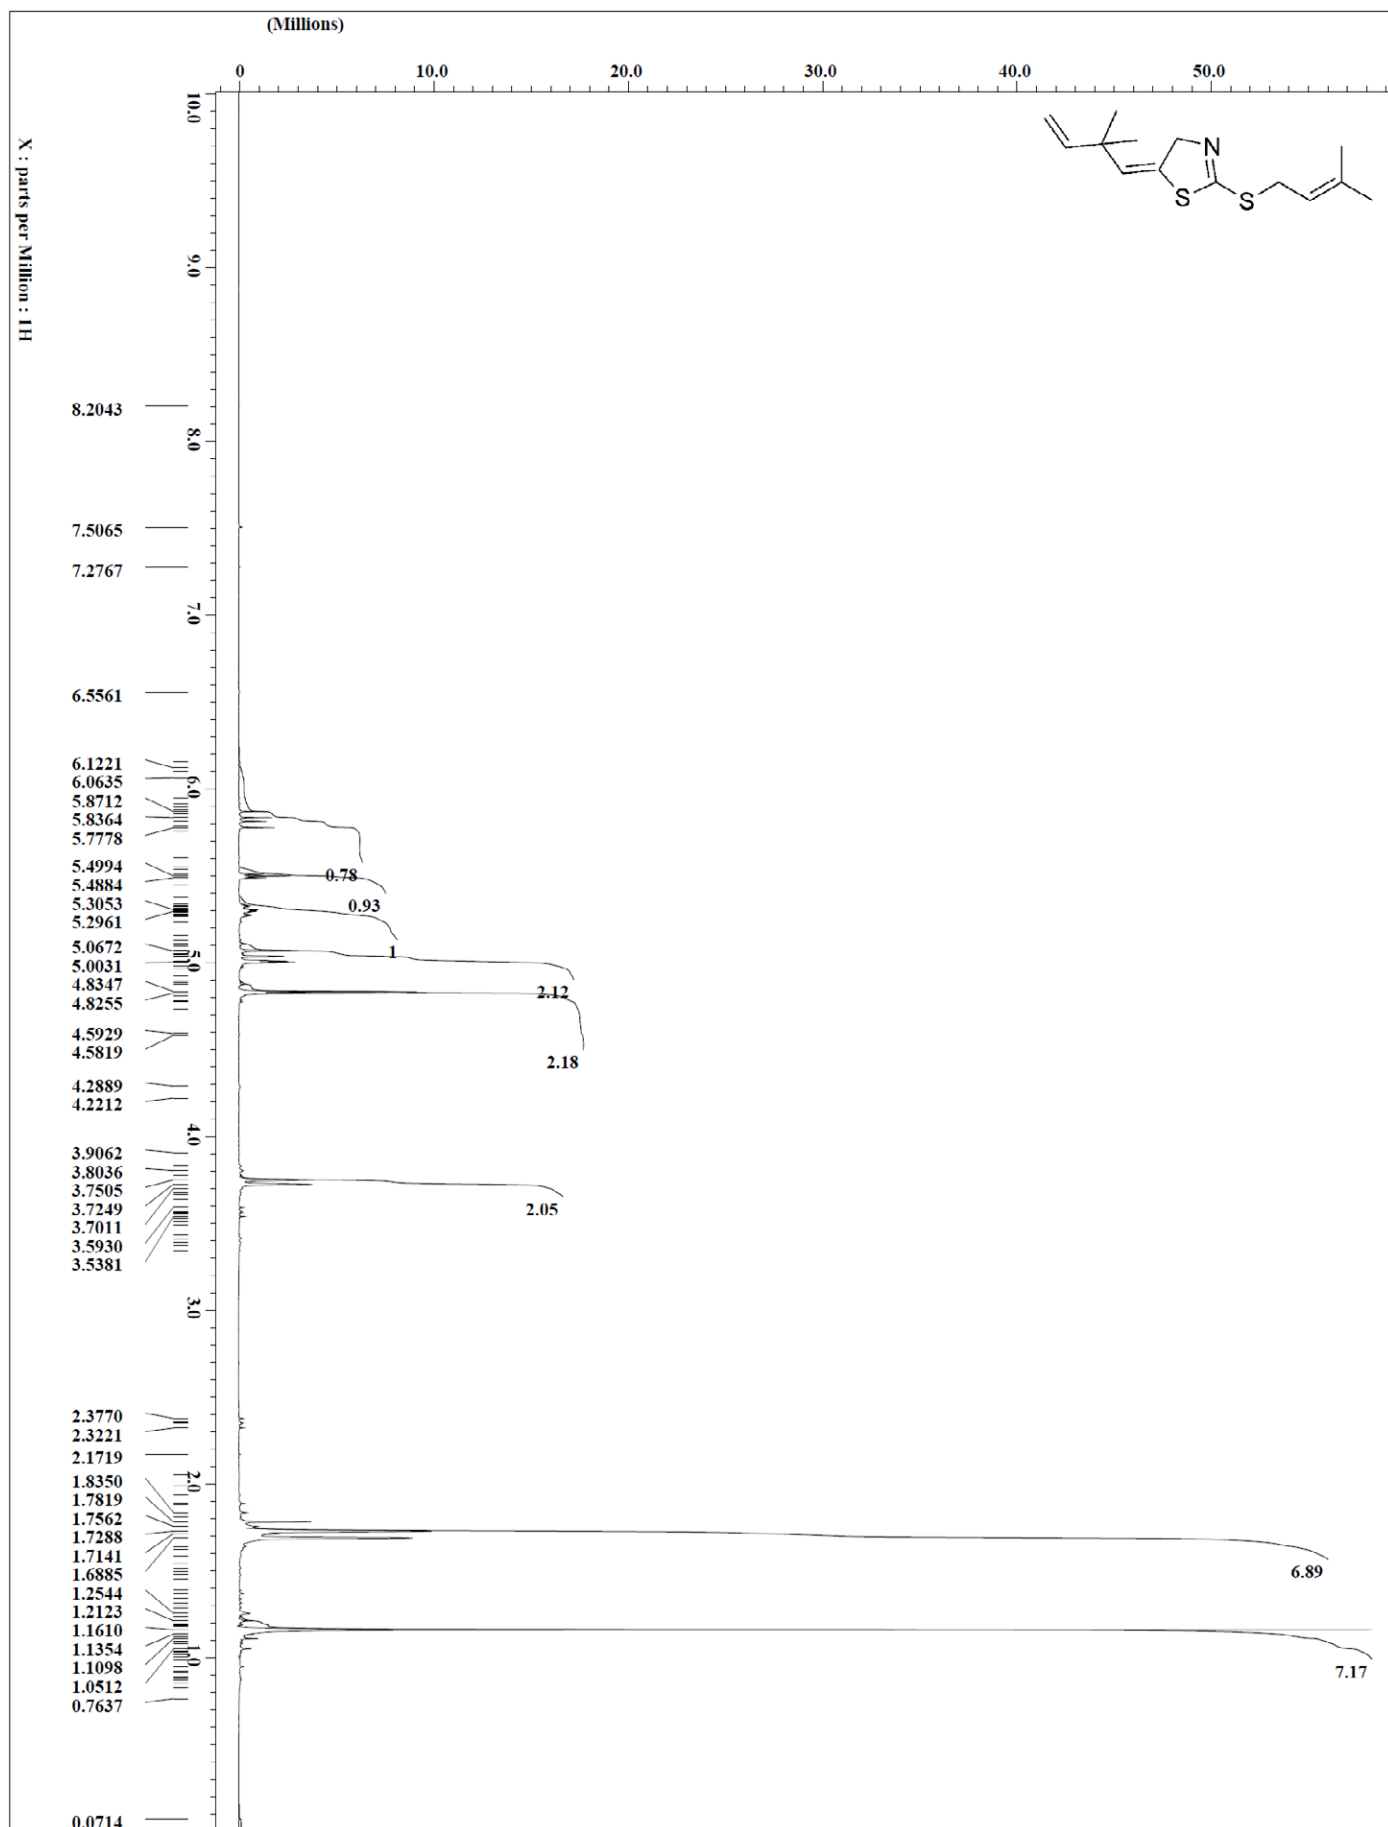

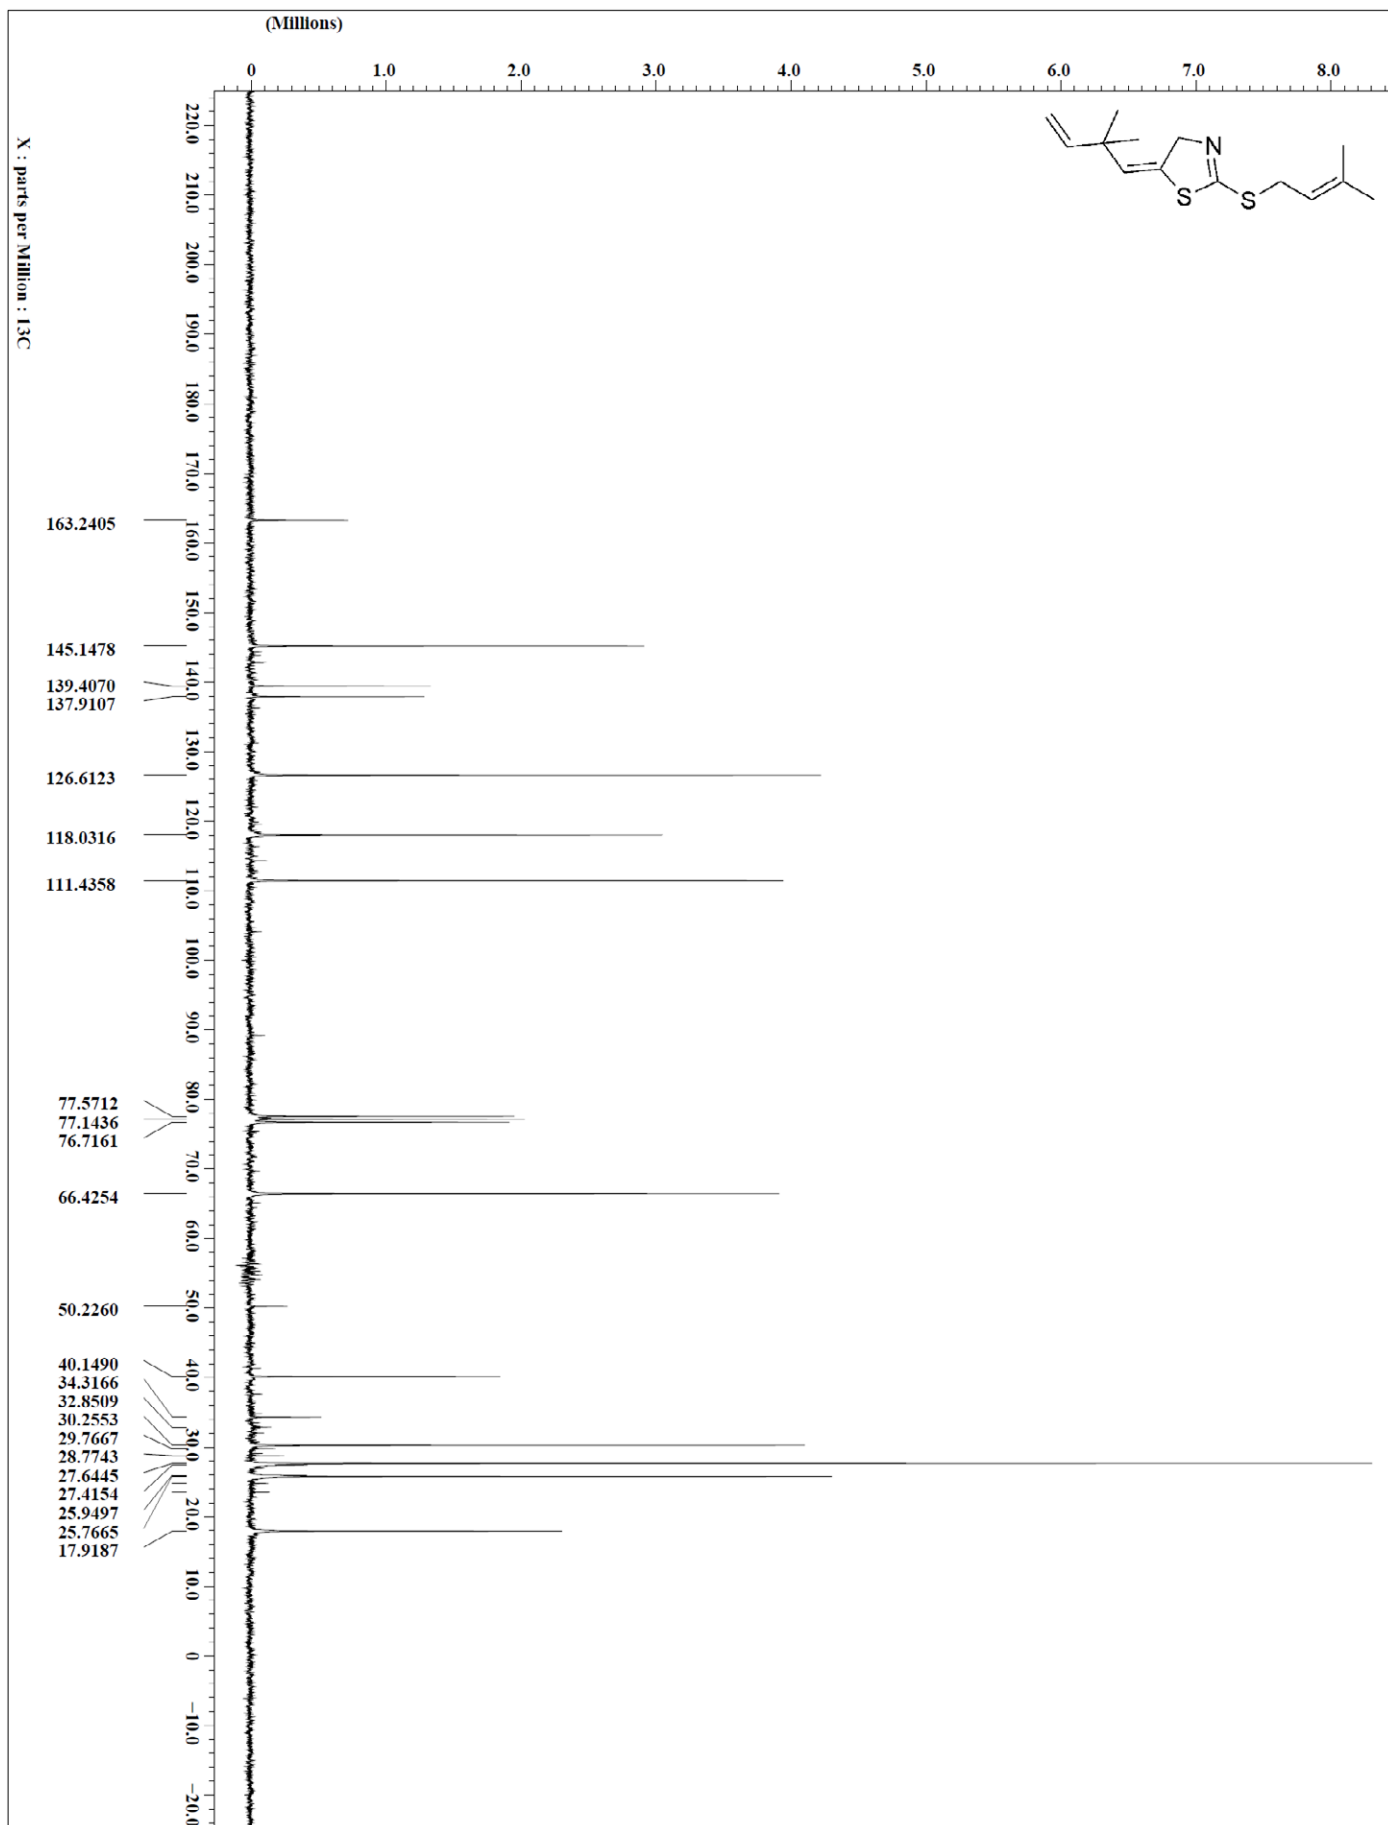

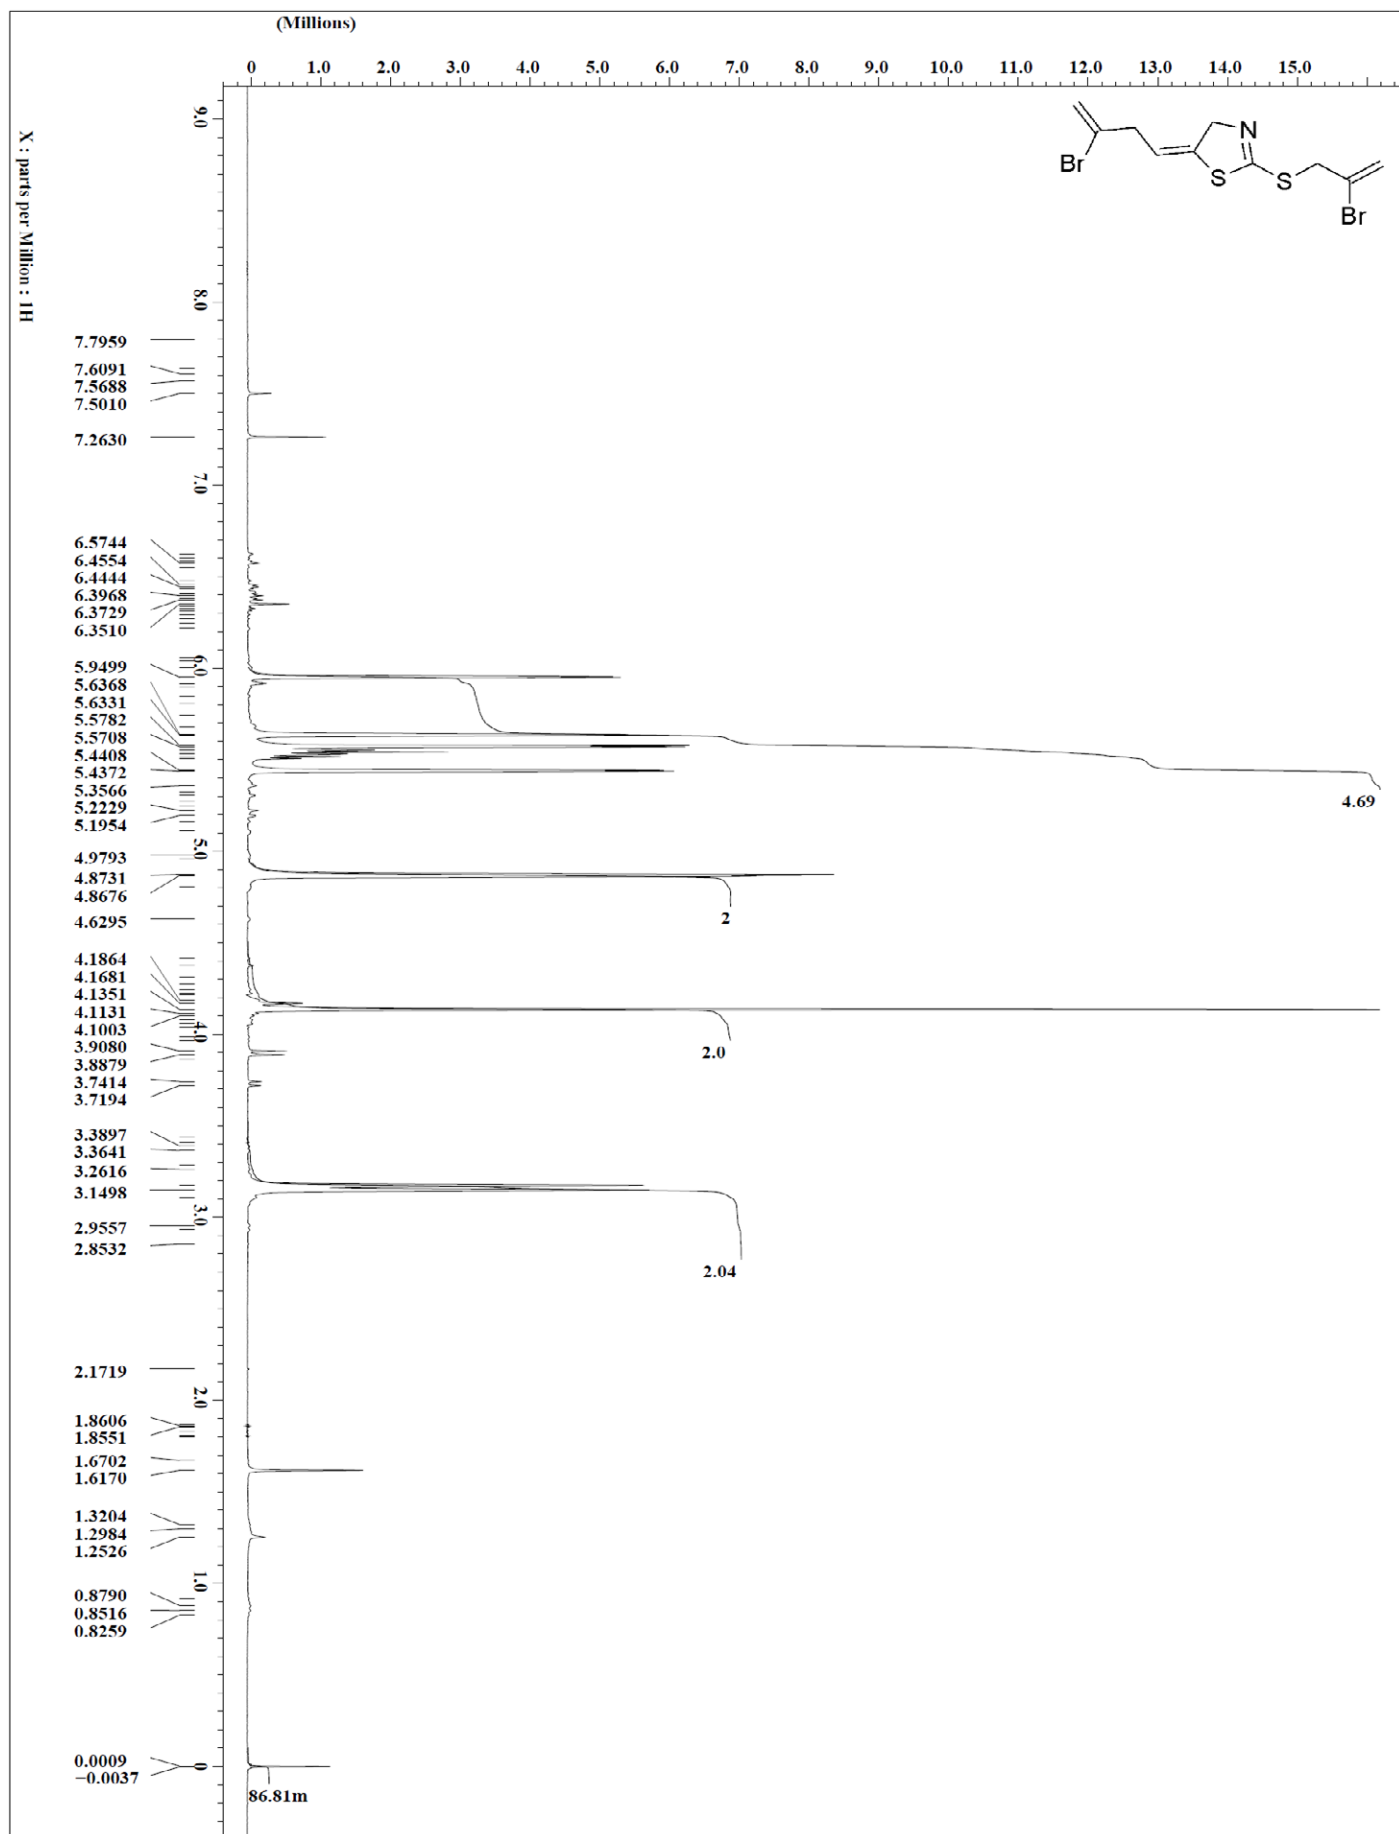

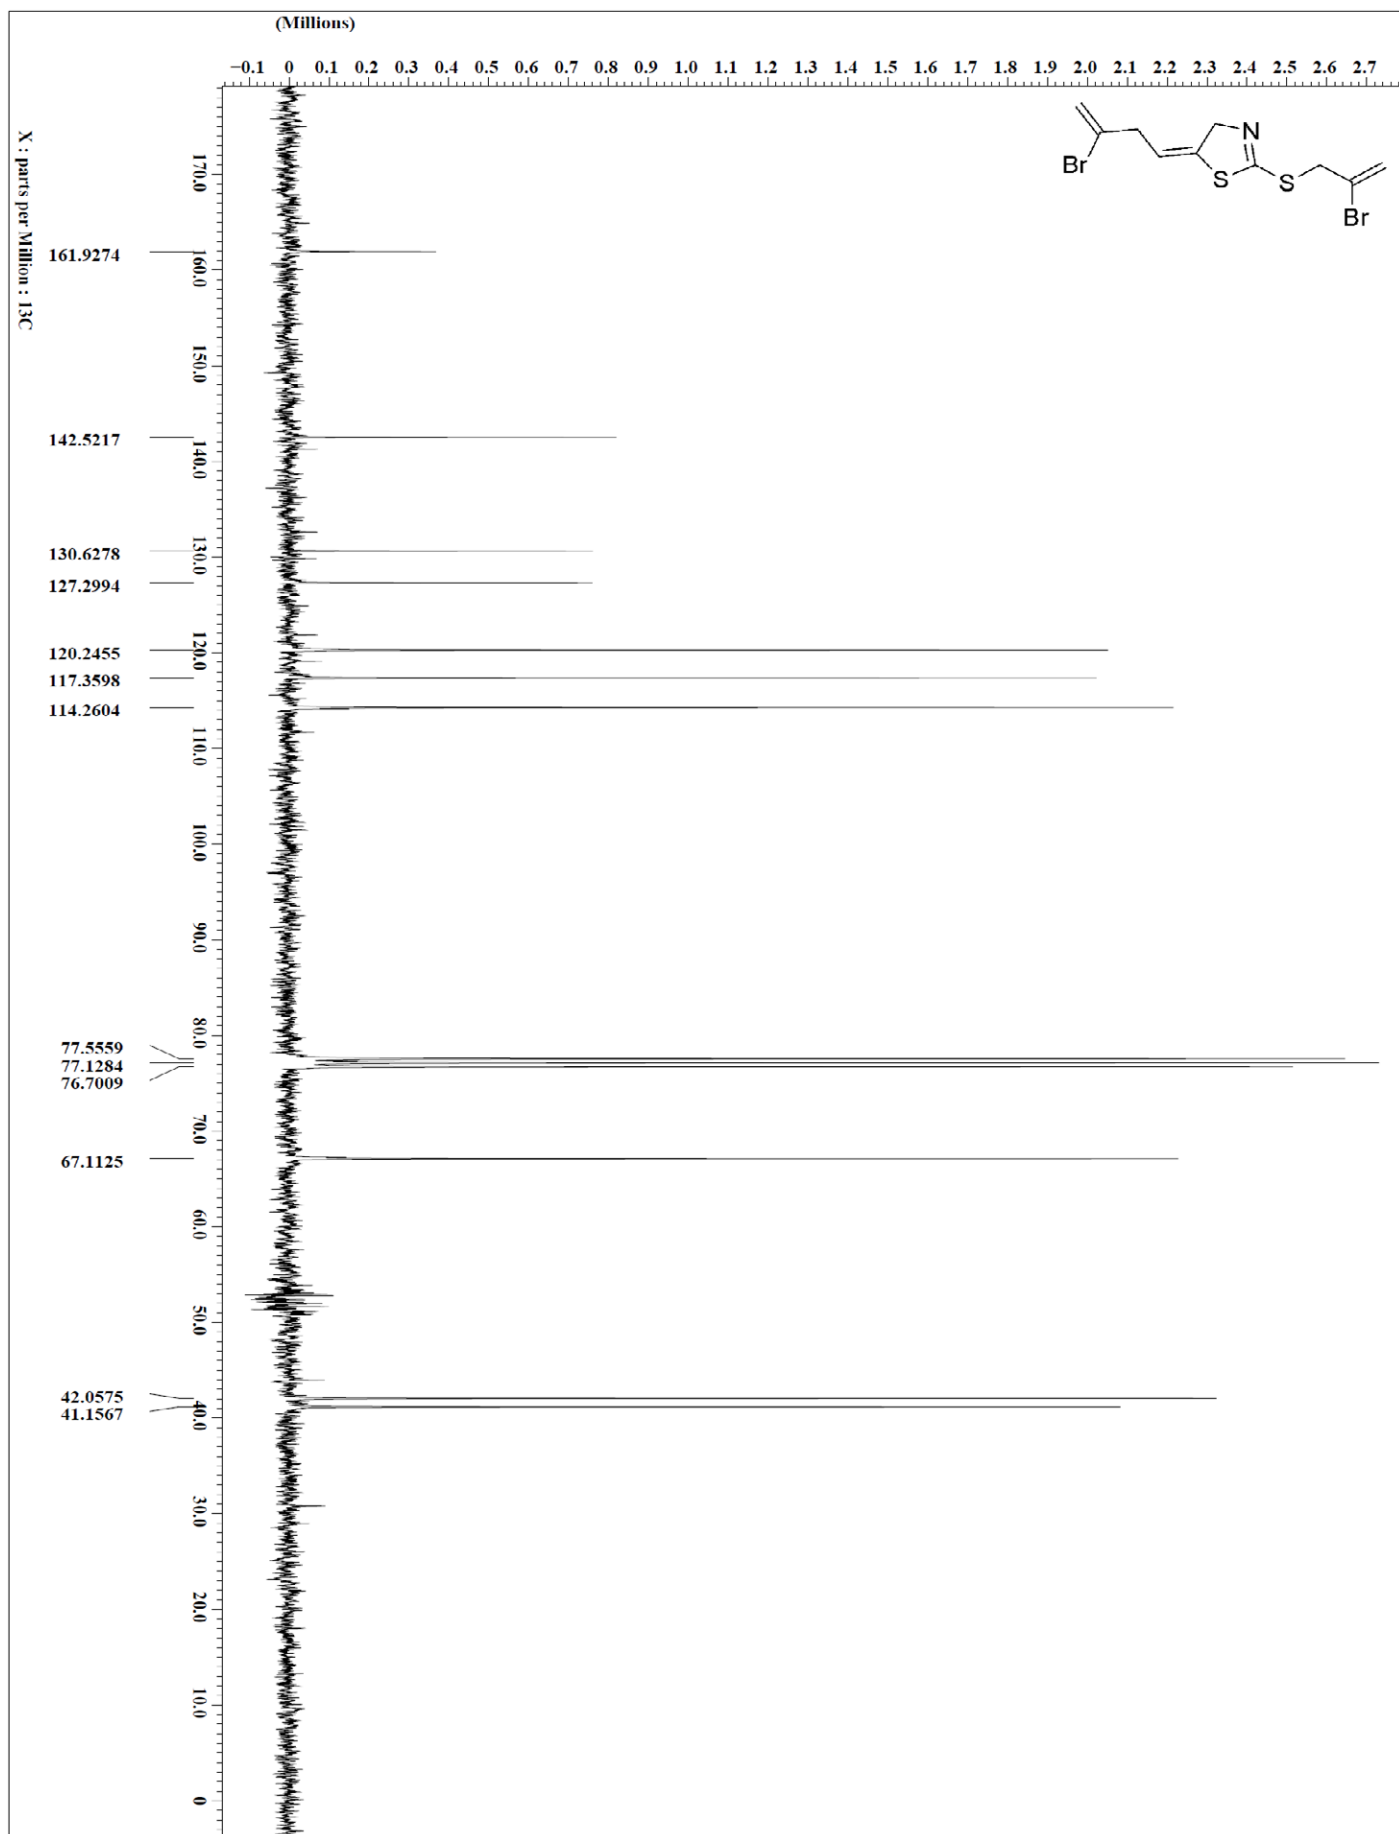

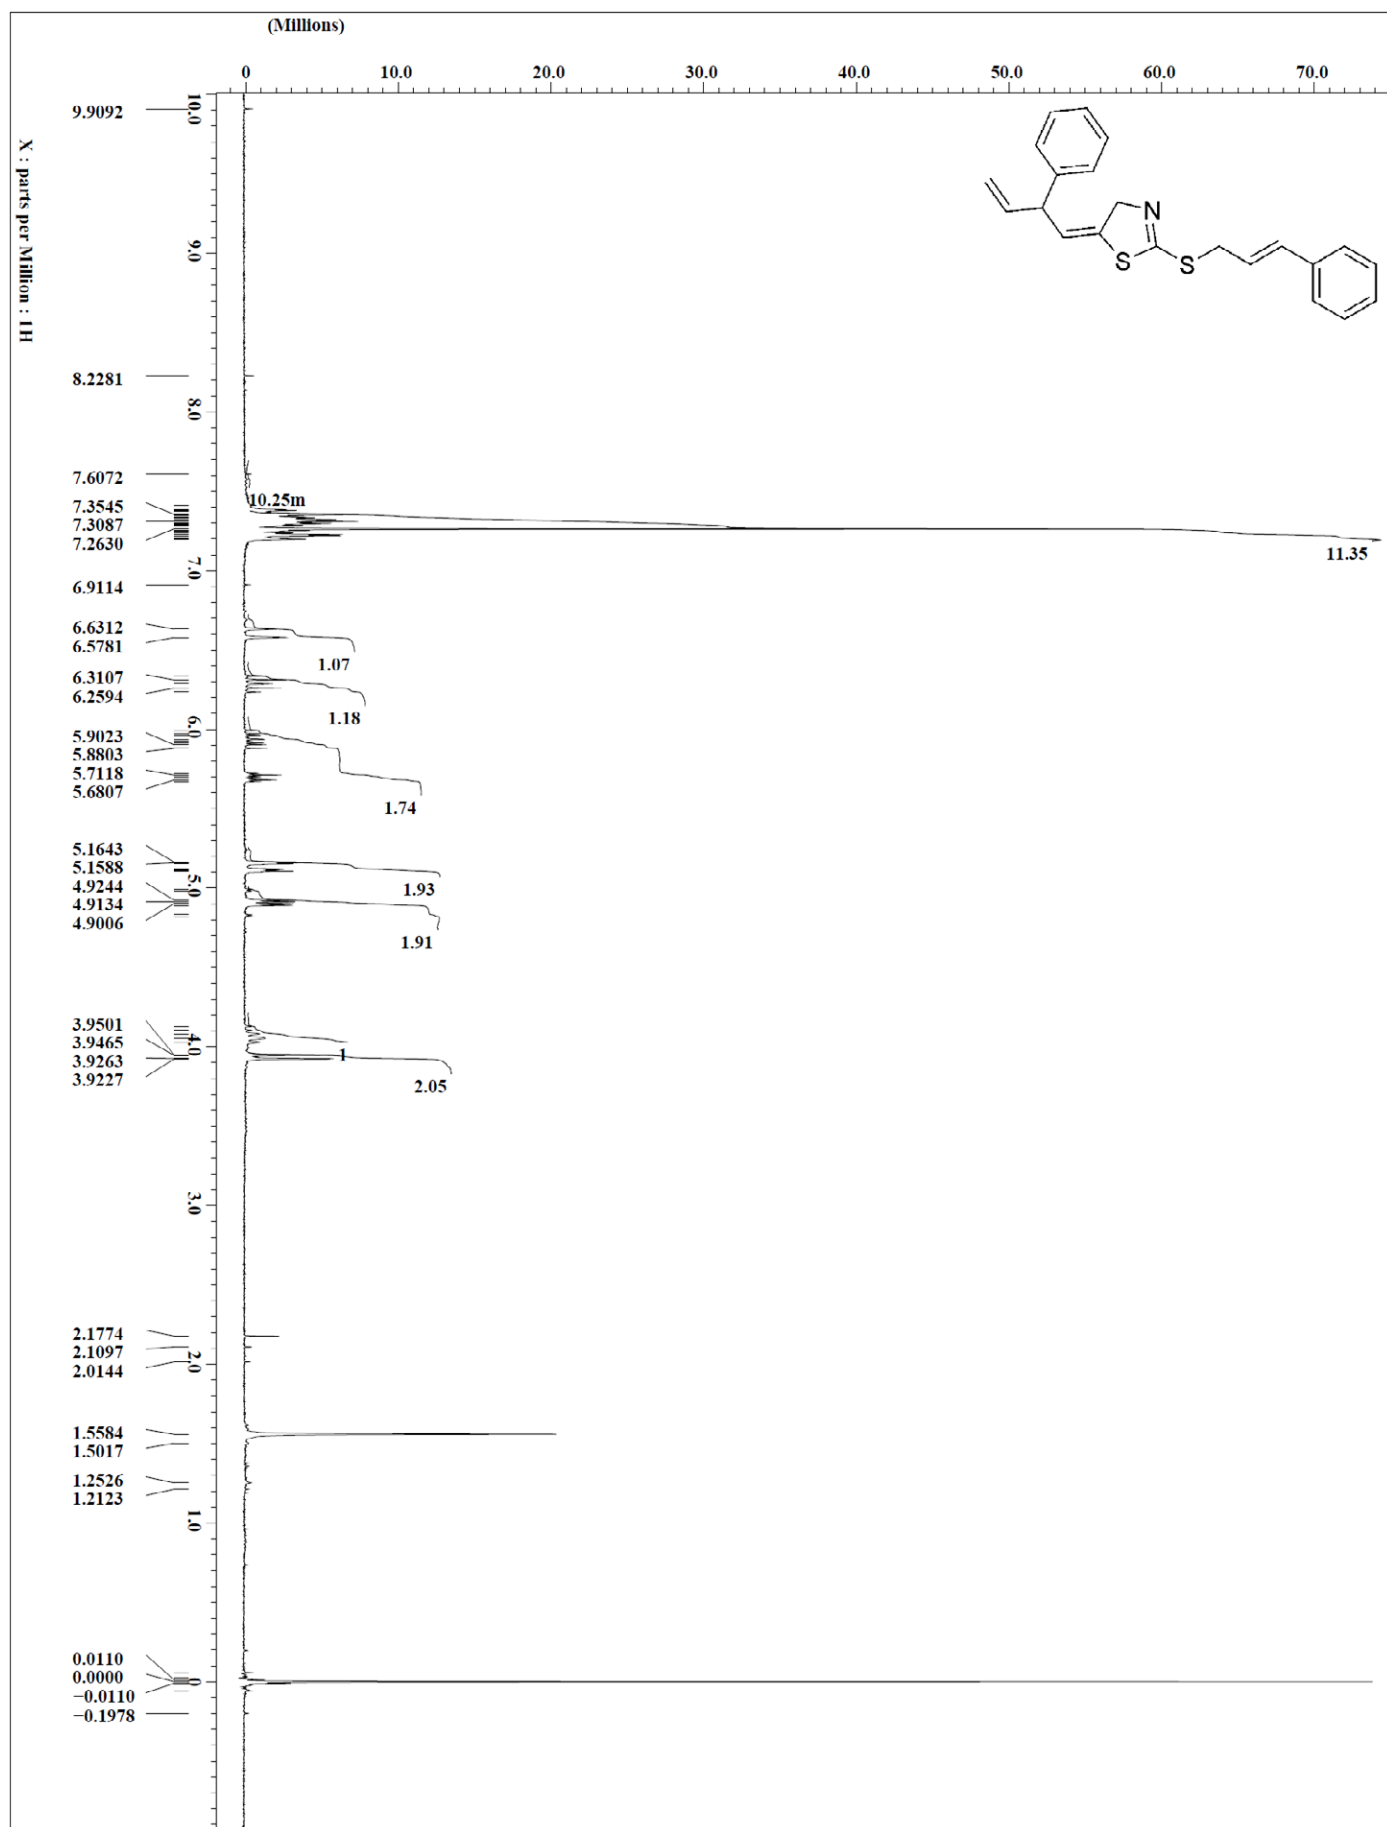

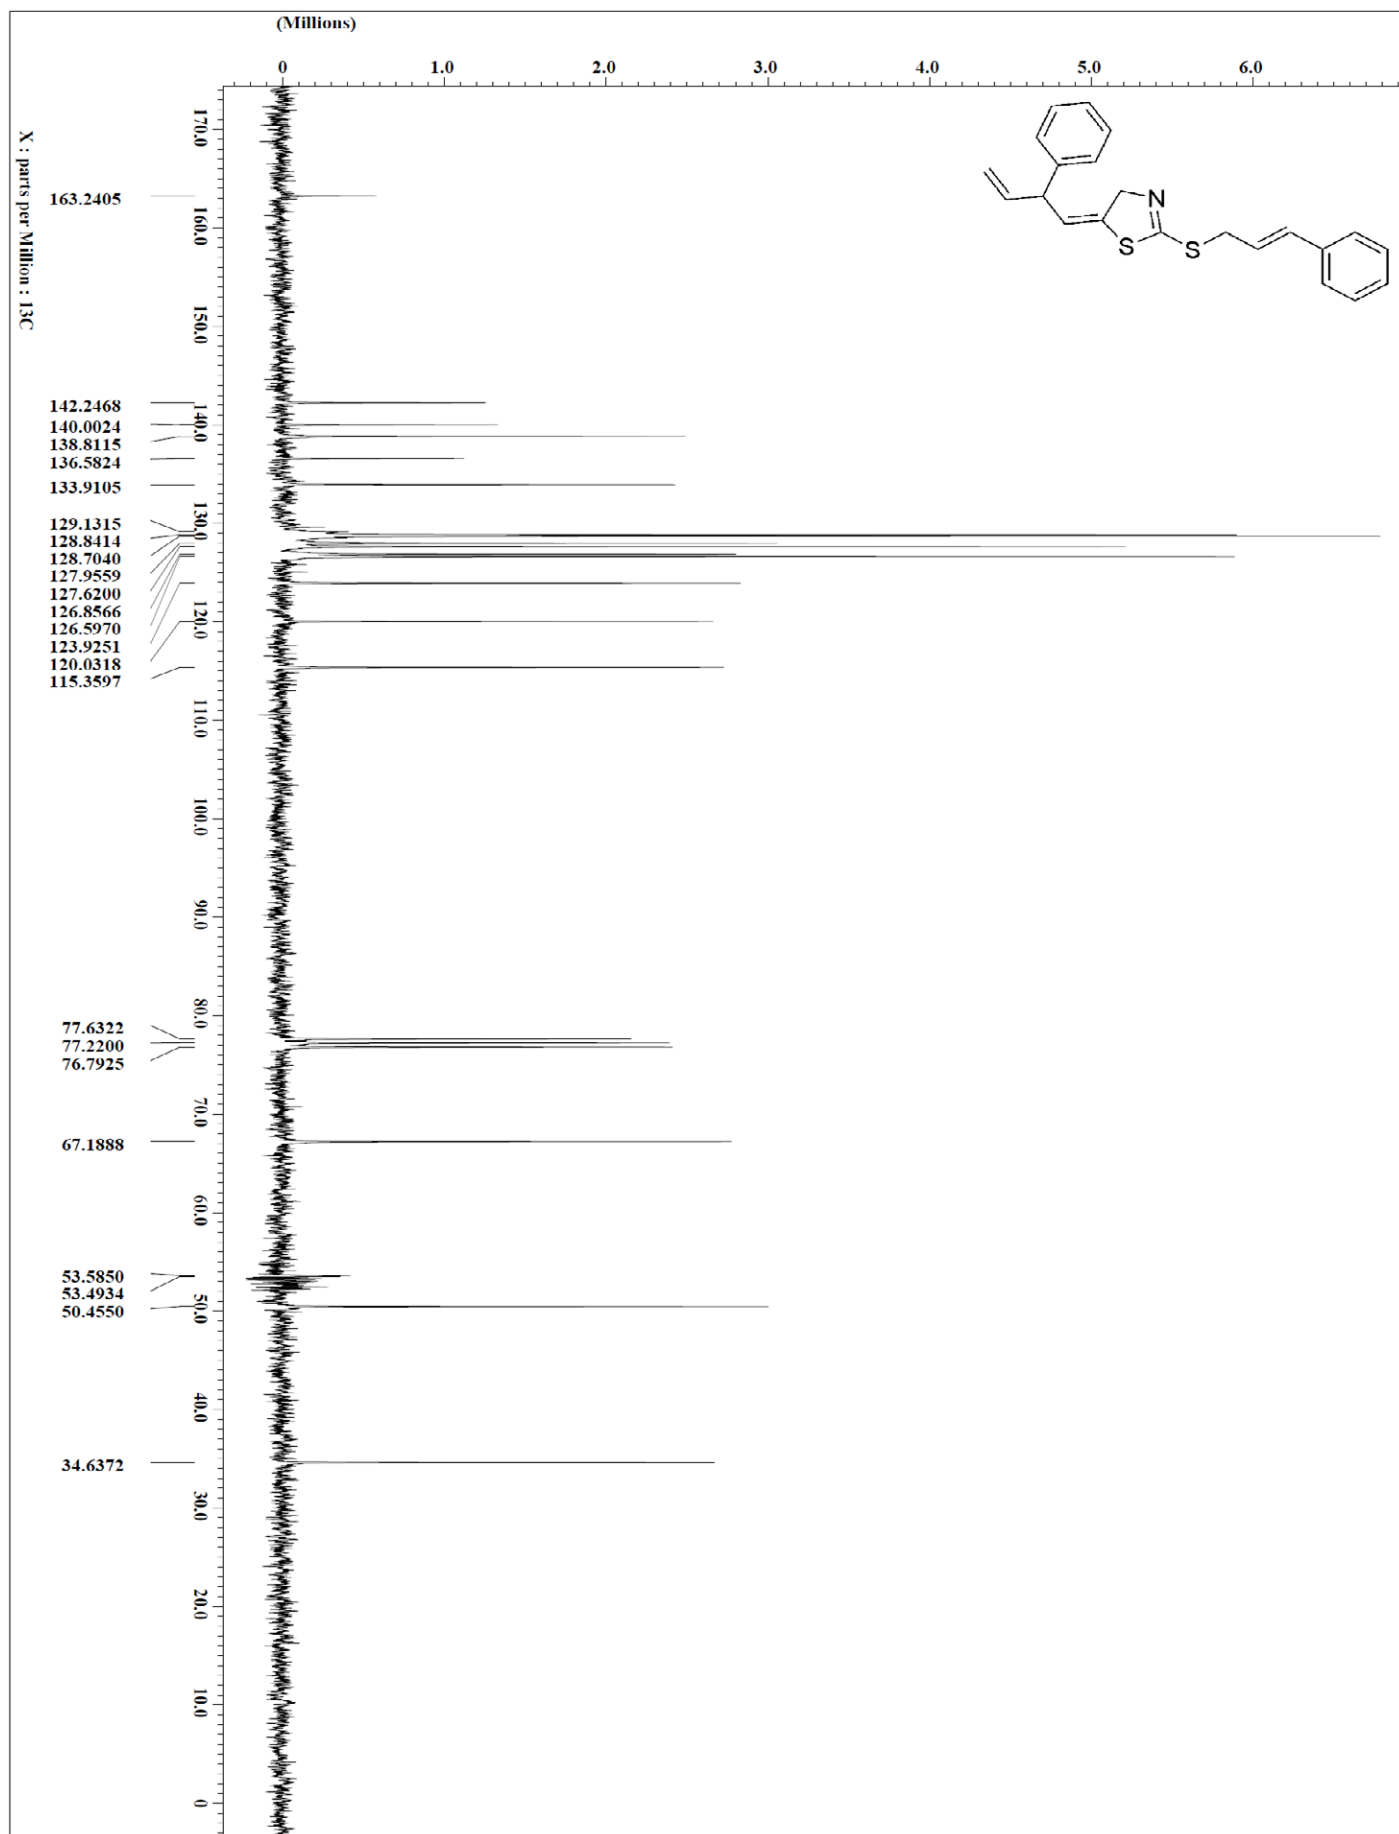

Supplement: c1ob05509g.pdf [file c1ob05509g.pdf]
